# Supplementary material for: Global trends in the application of nanopore sequencing technology in the detection of infectious disease pathogens: a bibliometric analysis from 2014 to 2024
Source: Frontiers journal article supplement (doi:10.3389/fmed.2025.1610063), 2025-07-23
Supplement: Table_1.xls [file Table_1.xls]

## Sheet: savedrecs
Supplementary Table 1.The complete metadata of 729 publications.
Article Title	Authors	Source Title	Language	Document Type	Author Keywords	Keywords Plus	Abstract	Affiliations	Cited Reference Count	Publisher	Publisher City	Journal Abbreviation	Publication Year	Citation Count	IF	DOI	Number of Pages	Research Areas	Pubmed Id	UT (Unique WOS ID)
Real-time, portable genome sequencing for Ebola surveillance	Quick, J; Loman, NJ; Duraffour, S; Simpson, JT; Ettore, S; Cowley, L; Bore, JA; Koundouno, R; Dudas, G; Mikhail, A; Ouédraogo, N; Afrough, B; Bah, A; Baum, JHJ; Becker-Ziaja, B; Boettcher, JP; Cabeza-Cabrerizo, M; Camino-Sánchez, A; Carter, LL; Doerrbecker, J; Enkirch, T; García-Dorival, I; Hetzelt, N; Hinzmann, J; Holm, T; Kafetzopoulou, LE; Koropogui, M; Kosgey, A; Kuisma, E; Logue, CH; Mazzare…	NATURE	English	Article	/	VIRUS; TRANSMISSION; OUTBREAK; EVOLUTION; DYNAMICS	The Ebola virus disease epidemic in West Africa is the largest on record, responsible for over 28,599 cases and more than 11,299 deaths(1). Genome sequencing in viral outbreaks is desirable to characterize the infectious agent and determine its evolutionary rate. Genome sequencing also allows the identification of signatures of host adaptation, identification and monitoring of diagnostic targets,…	University of Birmingham; Leibniz Association; Bernhard Nocht Institut fur Tropenmedizin; Leibniz Association; Bernhard Nocht Institut fur Tropenmedizin; University of Toronto; Ontario Institute for Cancer Research; University of Toronto; European Centre for Disease Prevention & Control; Public Health England; University of Edinburgh; Robert Koch Institute; Public Health England; University of Ba…	33	NATURE PORTFOLIO	BERLIN	NATURE	2016	968	50.5	10.1038/nature16996	17	Science & Technology - Other Topics	26840485	WOS:000369916700041
A complete bacterial genome assembled de novo using only nanopore sequencing data	Loman, NJ; Quick, J; Simpson, JT	NATURE METHODS	English	Article	/	MICROBIAL GENOMES; ALIGNMENT	We have assembled de novo the Escherichia coli K-12 MG1655 chromosome in a single 4.6-Mb contig using only nanopore data. Our method has three stages: (i) overlaps are detected between reads and then corrected by a multiple-alignment process; (ii) corrected reads are assembled using the Celera Assembler; and (iii) the assembly is polished using a probabilistic model of the signal-level data. The …	University of Birmingham; Ontario Institute for Cancer Research; University of Toronto; University of Toronto	21	NATURE PORTFOLIO	BERLIN	NAT METHODS	2015	826	36.1	10.1038/NMETH.3444	4	Biochemistry & Molecular Biology	26076426	WOS:000358736100014
Multiplex PCR method for MinION and Illumina sequencing of Zika and other virus genomes directly from clinical samples	Quick, J; Grubaugh, ND; Pullan, ST; Claro, IM; Smith, AD; Gangavarapu, K; Oliveira, G; Robles-Sikisaka, R; Rogers, TF; Beutler, NA; Burton, DR; Lewis-Ximenez, LL; de Jesus, JG; Giovanetti, M; Hill, SC; Black, A; Bedford, T; Carroll, MW; Nunes, M; Alcantara, LC; Sabino, EC; Baylis, SA; Faria, NR; Loose, M; Simpson, JT; Pybus, OG; Andersen, KG; Loman, NJ	NATURE PROTOCOLS	English	Article	/	SURESELECT TARGET ENRICHMENT; REAL-TIME; EBOLA; SURVEILLANCE; AMPLIFICATION; EVOLUTION; INSIGHTS; PASSAGES; ROBUST; LASSA	Genome sequencing has become a powerful tool for studying emerging infectious diseases; however, genome sequencing directly from clinical samples (i.e., without isolation and culture) remains challenging for viruses such as Zika, for which metagenomic sequencing methods may generate insufficient numbers of viral reads. Here we present a protocol for generating coding-sequence-complete genomes, co…	University of Birmingham; Scripps Research Institute; Public Health England; Universidade de Sao Paulo; Universidade de Sao Paulo; Scripps Research Institute; Harvard University; Harvard University Medical Affiliates; Massachusetts General Hospital; Fundacao Oswaldo Cruz; Fundacao Oswaldo Cruz; University of Rome Tor Vergata; University of Oxford; Fred Hutchinson Cancer Center; University of Wash…	59	NATURE PUBLISHING GROUP	LONDON	NAT PROTOC	2017	726	13.1	10.1038/nprot.2017.066	16	Biochemistry & Molecular Biology	28538739	WOS:000402122900001
Completing bacterial genome assemblies with multiplex MinION sequencing	Wick, RR; Judd, LM; Gorrie, CL; Holt, KE	MICROBIAL GENOMICS	English	Article	genome assembly; hybrid assembly; oxford nanopore; multiplex sequencing; long-read sequencing; Klebsiella pneumoniae	PUBLIC-HEALTH; RESISTANCE; MICROBIOLOGY; DIVERSITY	Illumina sequencing platforms have enabled widespread bacterial whole genome sequencing. While Illumina data is appropriate for many analyses, its short read length limits its ability to resolve genomic structure. This has major implications for tracking the spread of mobile genetic elements, including those which carry antimicrobial resistance determinants. Fully resolving a bacterial genome req…	University of Melbourne	31	MICROBIOLOGY SOC	LONDON	MICROB GENOMICS	2017	636	4	10.1099/mgen.0.000132	7	Genetics & Heredity; Microbiology	29177090	WOS:000431155600005
Rapid pathogen detection by metagenomic next-generation sequencing of infected body fluids	Gu, W; Deng, XD; Lee, M; Sucu, YD; Arevalo, S; Stryke, D; Federman, S; Gopez, A; Reyes, K; Zorn, K; Sample, H; Yu, GX; Ishpuniani, G; Briggs, B; Chow, ED; Berger, A; Wilson, MR; Wang, C; Hsu, E; Miller, S; DeRisi, JL; Chiu, CY	NATURE MEDICINE	English	Article	/	IN-HOSPITAL MORTALITY; CELL-FREE DNA; ANTIMICROBIAL THERAPY; BACTERIAL-MENINGITIS; HUMAN VIROME; REAL-TIME; IDENTIFICATION; DIAGNOSIS; DURATION	We developed a metagenomic next-generation sequencing (mNGS) test using cell-free DNA from body fluids to identify pathogens. The performance of mNGS testing of 182 body fluids from 160 patients with acute illness was evaluated using two sequencing platforms in comparison to microbiological testing using culture, 16S bacterial PCR and/or 28S-internal transcribed ribosomal gene spacer (28S-ITS) fu…	University of California System; University of California San Francisco; University of Leeds; University of California System; University of California San Francisco; University of California System; University of California San Francisco; University of California System; University of California San Francisco; University of California System; University of California San Francisco; Chan Zuckerbe…	65	NATURE PORTFOLIO	BERLIN	NAT MED	2021	420	58.7	10.1038/s41591-020-1105-z	26	Biochemistry & Molecular Biology; Cell Biology; Research & Experimental Medicine	33169017	WOS:000588007500001
Nanopore metagenomics enables rapid clinical diagnosis of bacterial lower respiratory infection	Charalampous, T; Kay, GL; Richardson, H; Aydin, A; Baldan, R; Jeanes, C; Rae, D; Grundy, S; Turner, DJ; Wain, J; Leggett, RM; Livermore, DM; O'Grady, J	NATURE BIOTECHNOLOGY	English	Article	/	REAL-TIME; STREPTOCOCCUS-PNEUMONIAE; HAEMOPHILUS-INFLUENZAE; CLOSTRIDIUM-DIFFICILE; GENETIC ELEMENTS; RESISTANCE; IDENTIFICATION; MICROBIOLOGY; MANAGEMENT; PATHOGENS	The gold standard for clinical diagnosis of bacterial lower respiratory infections (LRIs) is culture, which has poor sensitivity and is too slow to guide early, targeted antimicrobial therapy. Metagenomic sequencing could identify LRI pathogens much faster than culture, but methods are needed to remove the large amount of human DNA present in these samples for this approach to be feasible. We dev…	University of East Anglia; UK Research & Innovation (UKRI); Biotechnology and Biological Sciences Research Council (BBSRC); Quadram Institute; University of London; King's College London; Guy's & St Thomas' NHS Foundation Trust; Oxford Nanopore Technologies; UK Research & Innovation (UKRI); Biotechnology and Biological Sciences Research Council (BBSRC); Earlham Institute; Public Health England	60	NATURE PUBLISHING GROUP	NEW YORK	NAT BIOTECHNOL	2019	406	33.1	10.1038/s41587-019-0156-5	12	Biotechnology & Applied Microbiology	31235920	WOS:000478028700024
Rapid antibiotic-resistance predictions from genome sequence data for Staphylococcus aureus and Mycobacterium tuberculosis	Bradley, P; Gordon, NC; Walker, TM; Dunn, L; Heys, S; Huang, B; Earle, S; Pankhurst, LJ; Anson, L; de Cesare, M; Piazza, P; Votintseva, AA; Golubchik, T; Wilson, DJ; Wyllie, DH; Diel, R; Niemann, S; Feuerriegel, S; Kohl, TA; Ismail, N; Omar, SV; Smith, EG; Buck, D; McVean, G; Walker, AS; Peto, TEA; Crook, DW; Iqbal, Z	NATURE COMMUNICATIONS	English	Article	/	DRUG-RESISTANCE; RPOB MUTATIONS; ANTIMICROBIAL RESISTANCE; RIFAMPIN RESISTANCE; MTBDRPLUS ASSAY; SUSCEPTIBILITY; PERFORMANCE; BLOOD; MICROBIOLOGY; SURVEILLANCE	The rise of antibiotic-resistant bacteria has led to an urgent need for rapid detection of drug resistance in clinical samples, and improvements in global surveillance. Here we show how de Bruijn graph representation of bacterial diversity can be used to identify species and resistance profiles of clinical isolates. We implement this method for Staphylococcus aureus and Mycobacterium tuberculosis…	University of Oxford; Wellcome Centre for Human Genetics; University of Oxford; Leibniz Association; Forschungszentrum Borstel; German Center for Infection Research; National Institute for Communicable Diseases (NICD); University of Pretoria; University of Oxford; Public Health England	62	NATURE PORTFOLIO	BERLIN	NAT COMMUN	2015	374	14.7	10.1038/ncomms10063	14	Science & Technology - Other Topics	26686880	WOS:000367568500003
Rapid metagenomic identification of viral pathogens in clinical samples by real-time nanopore sequencing analysis	Greninger, AL; Naccache, SN; Federman, S; Yu, GX; Mbala, P; Bres, V; Stryke, D; Bouquet, J; Somasekar, S; Linnen, JM; Dodd, R; Mulembakani, P; Schneider, BS; Muyembe-Tamfum, JJ; Stramer, SL; Chiu, CY	GENOME MEDICINE	English	Article	/	BACTERIAL; VIRUS; PERFORMANCE; DIAGNOSIS; OUTBREAK; ASSAYS	We report unbiased metagenomic detection of chikungunya virus (CHIKV), Ebola virus (EBOV), and hepatitis C virus (HCV) from four human blood samples by MinION nanopore sequencing coupled to a newly developed, web-based pipeline for real-time bioinformatics analysis on a computational server or laptop (MetaPORE). At titers ranging from 10(7)-10(8) copies per milliliter, reads to EBOV from two pati…	University of California System; University of California San Francisco; University of California System; University of California San Francisco; Institute Nacional de Recherche Biomedical; Hologic, Inc.; American Red Cross; University of California System; University of California San Francisco	39	BMC	LONDON	GENOME MED	2015	362	10.4	10.1186/s13073-015-0220-9	13	Genetics & Heredity	26416663	WOS:000361870000001
MinION nanopore sequencing identifies the position and structure of a bacterial antibiotic resistance island	Ashton, PM; Nair, S; Dallman, T; Rubino, S; Rabsch, W; Mwaigwisya, S; Wain, J; O'Grady, J	NATURE BIOTECHNOLOGY	English	Article	/	TYPHI	Short-read, high-throughput sequencing technology cannot identify the chromosomal position of repetitive insertion sequences that typically flank horizontally acquired genes such as bacterial virulence genes and antibiotic resistance genes. The MinION nanopore sequencer can produce long sequencing reads on a device similar in size to a USB memory stick. Here we apply a MinION sequencer to resolve…	Public Health England; University of Sassari; King Faisal Specialist Hospital & Research Center; Robert Koch Institute; University of East Anglia	31	NATURE PUBLISHING GROUP	NEW YORK	NAT BIOTECHNOL	2015	319	33.1	10.1038/nbt.3103	7	Biotechnology & Applied Microbiology	25485618	WOS:000350766900027
Identification of bacterial pathogens and antimicrobial resistance directly from clinical urines by nanopore-based metagenomic sequencing	Schmidt, K; Mwaigwisya, S; Crossman, LC; Doumith, M; Munroe, D; Pires, C; Khan, AM; Woodford, N; Saunders, NJ; Wain, J; O'Grady, J; Livermore, DM	JOURNAL OF ANTIMICROBIAL CHEMOTHERAPY	English	Article	/	STAPHYLOCOCCUS-AUREUS; REAL-TIME; GENOME; ALIGNMENT; ARTEMIS; SAMPLES	Objectives: The introduction of metagenomic sequencing to diagnostic microbiology has been hampered by slowness, cost and complexity. We explored whether MinION nanopore sequencing could accelerate diagnosis and resistance profiling, using complicated urinary tract infections as an exemplar. Methods: Bacterial DNA was enriched from clinical urines (n=10) and from healthy urines 'spiked' with mult…	University of East Anglia; Public Health England; Norfolk & Norwich University Hospitals NHS Foundation Trust; Norfolk & Norwich University Hospital; Brunel University	40	OXFORD UNIV PRESS	OXFORD	J ANTIMICROB CHEMOTH	2017	215	3.9	10.1093/jac/dkw397	11	Infectious Diseases; Microbiology; Pharmacology & Pharmacy	27667325	WOS:000394038700015
Complete, closed bacterial genomes from microbiomes using nanopore sequencing	Moss, EL; Maghini, DG; Bhatt, AS	NATURE BIOTECHNOLOGY	English	Article	/	/	Microbial genomes can be assembled from short-read sequencing data, but the assembly contiguity of these metagenome-assembled genomes is constrained by repeat elements. Correct assignment of genomic positions of repeats is crucial for understanding the effect of genome structure on genome function. We applied nanopore sequencing and our workflow, named Lathe, which incorporates long-read assembly…	Stanford University; Stanford University	42	NATURE PORTFOLIO	BERLIN	NAT BIOTECHNOL	2020	205	33.1	10.1038/s41587-020-0422-6	12	Biotechnology & Applied Microbiology	32042169	WOS:000512528600002
Analytical validity of nanopore sequencing for rapid SARS-CoV-2 genome analysis	Bull, RA; Adikari, TN; Ferguson, JM; Hammond, JM; Stevanovski, I; Beukers, AG; Naing, Z; Yeang, M; Verich, A; Gamaarachchi, H; Kim, KW; Luciani, F; Stelzer-Braid, S; Eden, JS; Rawlinson, WD; van Hal, SJ; Deveson, IW	NATURE COMMUNICATIONS	English	Article	/	REAL-TIME; TRANSMISSION; DISCOVERY; MUTATION	Viral whole-genome sequencing (WGS) provides critical insight into the transmission and evolution of Severe Acute Respiratory Syndrome Coronavirus 2 (SARS-CoV-2). Long-read sequencing devices from Oxford Nanopore Technologies (ONT) promise significant improvements in turnaround time, portability and cost, compared to established short-read sequencing platforms for viral WGS (e.g., Illumina). Howe…	University of New South Wales Sydney; Kirby Institute; University of New South Wales Sydney; Garvan Institute of Medical Research; NSW Health; Royal Prince Alfred Hospital; University of Sydney; University of New South Wales Sydney; Prince of Wales Hospital (POWH); University of New South Wales Sydney; University of New South Wales Sydney; University of Sydney; University of Sydney; University of…	45	NATURE PORTFOLIO	BERLIN	NAT COMMUN	2020	188	14.7	10.1038/s41467-020-20075-6	8	Science & Technology - Other Topics	33298935	WOS:000600148500001
Genomic epidemiology of the UK outbreak of the emerging human fungal pathogen Candida auris	Rhodes, J; Abdolrasouli, A; Farrer, RA; Cuomo, CA; Aanensen, DM; Armstrong-James, D; Fisher, MC; Schelenz, S	EMERGING MICROBES & INFECTIONS	English	Article	/	FLUCYTOSINE RESISTANCE; POPULATION GENOMICS; NOSOCOMIAL FUNGEMIA; REAL-TIME; MECHANISMS; PROTEIN; GENES; MENINGITIS; MUTATIONS; EMERGENCE	Candida auris was first described in 2009, and it has since caused nosocomial outbreaks, invasive infections, and fungaemia across at least 19 countries on five continents. An outbreak of C. auris occurred in a specialized cardiothoracic London hospital between April 2015 and November 2016, which to date has been the largest outbreak in the UK, involving a total of 72 patients. To understand the …	Imperial College London; Imperial College London; Imperial College London; Harvard University; Massachusetts Institute of Technology (MIT); Broad Institute; Wellcome Trust Sanger Institute	60	TAYLOR & FRANCIS LTD	ABINGDON	EMERG MICROBES INFEC	2018	187	8.4	10.1038/s41426-018-0045-x	12	Immunology; Infectious Diseases; Microbiology	29593275	WOS:000429080400002
Evaluation of Oxford Nanopore's MinION Sequencing Device for Microbial Whole Genome Sequencing Applications	Tyler, AD; Mataseje, L; Urfano, CJ; Schmidt, L; Antonation, KS; Mulvey, MR; Corbett, CR	SCIENTIFIC REPORTS	English	Article	/	AMPLIFICATION; METHYLATION	The MinION sequencer (Oxford Nanopore Technologies) is a paradigm shifting device allowing rapid, real time long read sequencing of nucleic acids. Yet external benchmarking of this technologies' capabilities has not been extensively reported, nor has thorough evaluation of its utility for field-based analysis with sub-optimal sample types been described. The aim of this study was to evaluate the …	Public Health Agency of Canada; University of Manitoba	32	NATURE PORTFOLIO	BERLIN	SCI REP-UK	2018	187	3.8	10.1038/s41598-018-29334-5	12	Science & Technology - Other Topics	30026559	WOS:000439101600030
Rapid implementation of SARS-CoV-2 sequencing to investigate cases of health-care associated COVID-19: a prospective genomic surveillance study	Meredith, LW; Hamilton, WL; Warne, B; Houldcroft, CJ; Hosmillo, M; Jahun, AS; Curran, MD; Parmar, S; Caller, LG; Caddy, SL; Khokhar, FA; Yakovleva, A; Hall, G; Feltwell, T; Forrest, S; Sridhar, S; Weekes, MP; Baker, S; Brown, N; Moore, E; Popay, A; Roddick, I; Reacher, M; Gouliouris, T; Peacock, SJ; Dougan, G; Török, ME; Goodfellow, I	LANCET INFECTIOUS DISEASES	English	Article	/	REAL-TIME; VIRUS; OUTBREAKS; ZIKA	Background The burden and influence of health-care associated severe acute respiratory syndrome coronavirus 2 (SARS-CoV-2) infections is unknown. We aimed to examine the use of rapid SARS-CoV-2 sequencing combined with detailed epidemiological analysis to investigate health-care associated SARS-CoV-2 infections and inform infection control measures. Methods In this prospective surveillance study,…	University of Cambridge; University of Cambridge; Francis Crick Institute; Wellcome Trust Sanger Institute; Public Health England; Public Health England	29	ELSEVIER SCI LTD	London	LANCET INFECT DIS	2020	185	36.4	10.1016/S1473-3099(20)30562-4	10	Infectious Diseases	/	WOS:000582185500040
Metagenomic sequencing at the epicenter of the Nigeria 2018 Lassa fever outbreak	Kafetzopoulou, LE; Pullan, ST; Lemey, P; Suchard, MA; Ehichioya, DU; Pahlmann, M; Thielebein, A; Hinzmann, J; Oestereich, L; Wozniak, DM; Efthymiadis, K; Schachten, D; Koenig, F; Matjeschk, J; Lorenzen, S; Lumley, S; Ighodalo, Y; Adomeh, DI; Olokor, T; Omomoh, E; Omiunu, R; Agbukor, J; Ebo, B; Aiyepada, J; Ebhodaghe, P; Osiemi, B; Ehikhametalor, S; Akhilomen, P; Airende, M; Esumeh, R; Muoebonam, …	SCIENCE	English	Article	/	REAL-TIME; VIRUS; ZIKA	The 2018 Nigerian Lassa fever season saw the largest ever recorded upsurge of cases, raising concerns over the emergence of a strain with increased transmission rate. To understand the molecular epidemiology of this upsurge, we performed, for the first time at the epicenter of an unfolding outbreak, metagenomic nanopore sequencing directly from patient samples, an approach dictated by the highly …	Public Health England; University of Liverpool; Leibniz Association; Bernhard Nocht Institut fur Tropenmedizin; KU Leuven; University of California System; University of California Los Angeles; University of California System; University of California Los Angeles; University of California System; University of California Los Angeles; German Center for Infection Research; Vrije Universiteit Brusse…	28	AMER ASSOC ADVANCEMENT SCIENCE	WASHINGTON	SCIENCE	2019	184	44.8	10.1126/science.aau9343	27	Science & Technology - Other Topics	30606844	WOS:000455315800063
Full-length 16S rRNA gene amplicon analysis of human gut microbiota using MinION™ nanopore sequencing confers species-level resolution	Matsuo, Y; Komiya, S; Yasumizu, Y; Yasuoka, Y; Mizushima, K; Takagi, T; Kryukov, K; Fukuda, A; Morimoto, Y; Naito, Y; Okada, H; Bono, H; Nakagawa, S; Hirota, K	BMC MICROBIOLOGY	English	Article	16S rRNA; Gut microbiota; MinION (TM); Nanopore sequencing	CLINICAL MICROBIOLOGY	Background: Species-level genetic characterization of complex bacterial communities has important clinical applications in both diagnosis and treatment. Amplicon sequencing of the 16S ribosomal RNA (rRNA) gene has proven to be a powerful strategy for the taxonomic classification of bacteria. This study aims to improve the method for full-length 16S rRNA gene analysis using the nanopore long-read …	Kansai Medical University; Kansai Medical University; The University of Osaka; The University of Osaka; Kyoto Prefectural University of Medicine; Tokai University; Research Organization of Information & Systems (ROIS); National Institute of Genetics (NIG) - Japan; Research Organization of Information & Systems (ROIS); Hiroshima University	45	BMC	LONDON	BMC MICROBIOL	2021	181	4	10.1186/s12866-021-02094-5	13	Microbiology	33499799	WOS:000611978600001
Successive Emergence of Ceftazidime-Avibactam Resistance through Distinct Genomic Adaptations in blaKPC-2-Harboring Klebsiella pneumoniae Sequence Type 307 Isolates	Giddins, MJ; Macesic, N; Annavajhala, MK; Stump, S; Khan, S; McConville, TH; Mehta, M; Gomez-Simmonds, A; Uhlemann, AC	ANTIMICROBIAL AGENTS AND CHEMOTHERAPY	English	Article	ceftazidime-avibactam; carbapenem-resistant Enterobacteriaceae; Klebsiella pneumoniae; long-read sequencing; antimicrobial resistance; bacterial genomics	ENTEROBACTERIACEAE	Ceftazidime-avibactam (CAZ-AVI) is a promising novel treatment for infections caused by carbapenem-resistant Enterobacteriaceae (CRE). Despite improved treatment outcomes compared to those achieved with aminoglycoside-and colistin-based regimens, the rapid evolution of CAZ-AVI resistance during treatment has previously been reported in Klebsiella pneumoniae sequence type 258 (ST258) bla(KPC-3)-ha…	Columbia University; Columbia University; Austin Research Institute; Florey Institute of Neuroscience & Mental Health; Howard Florey Institute Affiliates; NewYork-Presbyterian Hospital	26	AMER SOC MICROBIOLOGY	WASHINGTON	ANTIMICROB AGENTS CH	2018	173	4.1	10.1128/AAC.02101-17	8	Microbiology; Pharmacology & Pharmacy	29263067	WOS:000427121800019
Third-Generation Sequencing in the Clinical Laboratory: Exploring the Advantages and Challenges of Nanopore Sequencing	Petersen, LM; Martin, IW; Moschetti, WE; Kershaw, CM; Tsongalis, GJ	JOURNAL OF CLINICAL MICROBIOLOGY	English	Review	nanopore sequencing; third-generation sequencing; infectious disease diagnostics	BACTERIAL IDENTIFICATION; GENOME; MINION; MICROBIOME; VALIDATION; DIAGNOSIS; STRAIN	Metagenomic sequencing for infectious disease diagnostics is an important tool that holds promise for use in the clinical laboratory. Challenges for implementation so far include high cost, the length of time to results, and the need for technical and bioinformatics expertise. However, the recent technological innovation of nanopore sequencing from Oxford Nanopore Technologies (ONT) has the poten…	Dartmouth College; Dartmouth College; Dartmouth College	69	AMER SOC MICROBIOLOGY	WASHINGTON	J CLIN MICROBIOL	2020	170	6.1	10.1128/JCM.01315-19	10	Microbiology	31619531	WOS:000505473500024
Nanopore Targeted Sequencing for the Accurate and Comprehensive Detection of SARS-CoV-2 and Other Respiratory Viruses	Wang, M; Fu, AS; Hu, B; Tong, YQ; Liu, R; Liu, Z; Gu, JS; Xiang, B; Liu, JH; Jiang, W; Shen, GG; Zhao, WX; Men, D; Deng, ZX; Yu, LL; Wei, W; Li, Y; Liu, TG	SMALL	English	Article	COVID-19; nanopore sequencing; respiratory virus; SARS-CoV-2; targeted amplification	ZIKA VIRUS; MINION; TRANSMISSION; DIAGNOSIS; SPREAD	The ongoing global novel coronavirus pneumonia COVID-19 outbreak has engendered numerous cases of infection and death. COVID-19 diagnosis relies upon nucleic acid detection; however, currently recommended methods exhibit high false-negative rates and are unable to identify other respiratory virus infections, thereby resulting in patient misdiagnosis and impeding epidemic containment. Combining th…	Wuhan University; Ministry of Education - China; Chinese Academy of Sciences; University of Chinese Academy of Sciences, CAS; Shanghai Institute of Nutrition & Health, CAS; Max Planck Society; Chinese Academy of Sciences; Wuhan Institute of Virology, CAS; Wuhan University; Shanghai Jiao Tong University	46	WILEY-V C H VERLAG GMBH	WEINHEIM	SMALL	2020	160	13	10.1002/smll.202002169	15	Chemistry; Science & Technology - Other Topics; Materials Science; Physics	32578378	WOS:000542158100001
Nanopore Sequencing as a Rapidly Deployable Ebola Outbreak Tool	Hoenen, T; Groseth, A; Rosenke, K; Fischer, RJ; Hoenen, A; Judson, SD; Martellaro, C; Falzarano, D; Marzi, A; Squires, RB; Wollenberg, KR; de Wit, E; Prescott, J; Safronetz, D; van Doremalen, N; Bushmaker, T; Feldmann, F; McNally, K; Bolay, FK; Fields, B; Sealy, T; Rayfield, M; Nichol, ST; Zoon, KC; Massaquoi, M; Munster, VJ; Feldmann, H	EMERGING INFECTIOUS DISEASES	English	Article	/	VIRUS; TRANSMISSION; LIBERIA	Rapid sequencing of RNA/DNA from pathogen samples obtained during disease outbreaks provides critical scientific and public health information. However, challenges exist for exporting samples to laboratories or establishing conventional sequencers in remote outbreak regions. We successfully used a novel, pocket-sized nanopore sequencer at a field diagnostic laboratory in Liberia during the curren…	Friedrich Loeffler Institute; National Institutes of Health (NIH) - USA; University of Saskatchewan; National Institutes of Health (NIH) - USA; Centers for Disease Control & Prevention - USA	15	CENTERS DISEASE CONTROL	ATLANTA	EMERG INFECT DIS	2016	158	7.2	10.3201/eid2202.151796	4	Immunology; Infectious Diseases	26812583	WOS:000368968500032
Metagenomic Next-Generation Sequencing of Nasopharyngeal Specimens Collected from Confirmed and Suspect COVID-19 Patients	Mostafa, HH; Fissel, JA; Fanelli, B; Bergman, Y; Gniazdowski, V; Dadlani, M; Carroll, KC; Colwell, RR; Simner, PJ	MBIO	English	Article	COVID-19; nasopharyngeal; SARS-CoV-2; metagenomic next-generation sequencing; metagenomics	HAEMOPHILUS-INFLUENZAE; LUNG MICROBIOTA; PATHOGENS; OUTCOMES	Metagenomic next-generation sequencing (mNGS) offers an agnostic approach for emerging pathogen detection directly from clinical specimens. In contrast to targeted methods, mNGS also provides valuable information on the composition of the microbiome and might uncover coinfections that may associate with disease progression and impact prognosis. To evaluate the use of mNGS for detecting severe acu…	Johns Hopkins University; University System of Maryland; University of Maryland College Park	53	AMER SOC MICROBIOLOGY	WASHINGTON	MBIO	2020	125	5.1	10.1128/mBio.01969-20	13	Microbiology	33219095	WOS:000613614600015
Nanopore Technology and Its Applications in Gene Sequencing	Lin, B; Hui, JA; Mao, HJ	BIOSENSORS-BASEL	English	Review	nanopore technology; nanopore sequencing; diagnosis of cancer; biosensor	REAL-TIME; TRANSCRIPTION FACTORS; DNA METHYLATION; G-QUADRUPLEXES; GENOME; GENERATION; MICRORNAS; DISEASE; TARGETS; ASSAY	In recent years, nanopore technology has become increasingly important in the field of life science and biomedical research. By embedding a nano-scale hole in a thin membrane and measuring the electrochemical signal, nanopore technology can be used to investigate the nucleic acids and other biomacromolecules. One of the most successful applications of nanopore technology, the Oxford Nanopore Tech…	Chinese Academy of Sciences; Shanghai Institute of Microsystem & Information Technology, CAS; Chinese Academy of Sciences; University of Chinese Academy of Sciences, CAS	115	MDPI	BASEL	BIOSENSORS-BASEL	2021	121	4.9	10.3390/bios11070214	17	Chemistry; Science & Technology - Other Topics; Instruments & Instrumentation	34208844	WOS:000676245100001
Nanopore sequencing and its application to the study of microbial communities	Ciuffreda, L; Rodríguez-Pérez, H; Flores, C	COMPUTATIONAL AND STRUCTURAL BIOTECHNOLOGY JOURNAL	English	Review	Nanopore sequencing; Targeted sequencing; Metagenomics; Metatranscriptomics; Bioinformatics	RNA GENE DATABASE; RIBOSOMAL-RNA; CLINICAL MICROBIOLOGY; READ ALIGNMENT; VIRUS GENOMES; IDENTIFICATION; METAGENOMICS; MINION; CLASSIFICATION; OPPORTUNITIES	Since its introduction, nanopore sequencing has enhanced our ability to study complex microbial samples through the possibility to sequence long reads in real time using inexpensive and portable technologies. The use of long reads has allowed to address several previously unsolved issues in the field, such as the resolution of complex genomic structures, and facilitated the access to metagenome a…	Universidad de la Laguna; Instituto de Salud Carlos III; CIBER - Centro de Investigacion Biomedica en Red; CIBERES; Universidad de la Laguna	145	ELSEVIER	AMSTERDAM	COMPUT STRUCT BIOTEC	2021	121	4.5	10.1016/j.csbj.2021.02.020	15	Biochemistry & Molecular Biology; Biotechnology & Applied Microbiology	33815688	WOS:000684840700021
Rapid MinION profiling of preterm microbiota and antimicrobial-resistant pathogens	Leggett, RM; Alcon-Giner, C; Heavens, D; Caim, S; Brook, TC; Kujawska, M; Martin, S; Peel, N; Acford-Palmer, H; Hoyles, L; Clarke, P; Hall, LJ; Clark, MD	NATURE MICROBIOLOGY	English	Article	/	ENTEROBACTER-CLOACAE; NANOPORE; ALIGNMENT; IDENTIFICATION	The MinION sequencing platform offers near real-time analysis of DNA sequence; this makes the tool attractive for deployment in fieldwork or clinical settings. We used the MinION platform coupled to the NanoOK RT software package to perform shotgun metagenomic sequencing and profile mock communities and faecal samples from healthy and ill preterm infants. Using Nanopore data, we reliably classifi…	UK Research & Innovation (UKRI); Biotechnology and Biological Sciences Research Council (BBSRC); Earlham Institute; UK Research & Innovation (UKRI); Biotechnology and Biological Sciences Research Council (BBSRC); Quadram Institute; University of Westminster; Nottingham Trent University; Norfolk & Norwich University Hospitals NHS Foundation Trust; Norfolk & Norwich University Hospital; University …	55	NATURE PUBLISHING GROUP	LONDON	NAT MICROBIOL	2020	111	20.5	10.1038/s41564-019-0626-z	28	Microbiology	31844297	WOS:000516654000006
Evaluation of NGS-based approaches for SARS-CoV-2 whole genome characterisation	Charre, C; Ginevra, C; Sabatier, M; Regue, H; Destras, G; Brun, S; Burfin, G; Scholtes, C; Morfin, F; Valette, M; Lina, B; Bal, A; Josset, L	VIRUS EVOLUTION	English	Article	whole-genome sequencing; next generation sequencing; SARS-CoV-2; COVID-19; genomic surveillance	/	Since the beginning of the COVID-19 outbreak, SARS-CoV-2 whole-genome sequencing (WGS) has been performed at unprecedented rate worldwide with the use of very diverse Next-Generation Sequencing (NGS) methods. Herein, we compare the performance of four NGS-based approaches for SARS-CoV-2 WGS. Twenty-four clinical respiratory samples with a large scale of Ct values (from 10.7 to 33.9) were sequence…	CHU Lyon; Universite Claude Bernard Lyon 1; Universite Claude Bernard Lyon 1; Institut National de la Sante et de la Recherche Medicale (Inserm); Institut National de la Sante et de la Recherche Medicale (Inserm); Centre National de la Recherche Scientifique (CNRS); CNRS - National Institute for Biology (INSB); Ecole Normale Superieure de Lyon (ENS de LYON); Universite Claude Bernard Lyon 1; CHU …	29	OXFORD UNIV PRESS	OXFORD	VIRUS EVOL	2020	104	5.5	10.1093/ve/veaa075	8	Virology	33318859	WOS:000610104700033
Metagenomic Nanopore Sequencing of Influenza Virus Direct from Clinical Respiratory Samples	Lewandowski, K; Xu, YF; Pullan, ST; Lumley, SF; Foster, D; Sanderson, N; Vaughan, A; Morgan, M; Bright, N; Kavanagh, J; Vipond, R; Carroll, MW; Marriott, AC; Gooch, KE; Andersson, M; Jeffery, K; Peto, TEA; Crook, DW; Walker, AS; Matthews, PC	JOURNAL OF CLINICAL MICROBIOLOGY	English	Article	influenza; Nanopore; metagenomic; diagnosis; epidemiology; sequencing; DNA sequencing; diagnostics; metagenomics; molecular epidemiology	TRANSMISSION; ALIGNMENT; MINION	Influenza is a major global public health threat as a result of its highly pathogenic variants, large zoonotic reservoir, and pandemic potential. Metagenomic viral sequencing offers the potential for a diagnostic test for influenza virus which also provides insights on transmission, evolution, and drug resistance and simultaneously detects other viruses. We therefore set out to apply the Oxford N…	Public Health England; University of Oxford; University of Oxford; Oxford University Hospitals NHS Foundation Trust; University of Oxford; University of Oxford	55	AMER SOC MICROBIOLOGY	WASHINGTON	J CLIN MICROBIOL	2020	103	6.1	10.1128/JCM.00963-19	15	Microbiology	31666364	WOS:000505473500008
Real-time analysis of nanopore-based metagenomic sequencing from infected orthopaedic devices	Sanderson, ND; Street, TL; Foster, D; Swann, J; Atkins, BL; Brent, AJ; McNally, MA; Oakley, S; Taylor, A; Peto, TEA; Crook, DW; Eyre, DW	BMC GENOMICS	English	Article	Nanopore; Prosthetic joint infection; Metagenomics; Real-time; Clinical; Device-related infection	PROSTHETIC-JOINT INFECTION; DIAGNOSIS; REVISION; IDENTIFICATION; PATHOGENS; HIP	Background: Prosthetic joint infections are clinically difficult to diagnose and treat. Previously, we demonstrated metagenomic sequencing on an Illumina MiSeq replicates the findings of current gold standard microbiological diagnostic techniques. Nanopore sequencing offers advantages in speed of detection over MiSeq. Here, we report a real-time analytical pathway for Nanopore sequence data, desi…	University of Oxford; University of Oxford; Oxford University Hospitals NHS Foundation Trust; Nuffield Orthopaedic Centre; University of Oxford; Oxford University Hospitals NHS Foundation Trust	37	BMC	LONDON	BMC GENOMICS	2018	98	3.5	10.1186/s12864-018-5094-y	11	Biotechnology & Applied Microbiology; Genetics & Heredity	30261842	WOS:000445962500002
Convergence of virulence and MDR in a single plasmid vector in MDR Klebsiella pneumoniae ST15	Lam, MMC; Wyres, KL; Wick, RR; Judd, LM; Fostervold, A; Holt, KE; Löhr, IH	JOURNAL OF ANTIMICROBIAL CHEMOTHERAPY	English	Article	/	RESISTANCE	Background: MDR and hypervirulence (hv) are typically observed in separate Klebsiella pneumoniae populations. However, convergent strains with both properties have been documented and potentially pose a high risk to public health in the form of invasive infections with limited treatment options. Objectives: Our aim was to characterize the genetic determinants of virulence and antimicrobial resist…	University of Melbourne; Stavanger University Hospital; University of Bergen; University of London; London School of Hygiene & Tropical Medicine	22	OXFORD UNIV PRESS	OXFORD	J ANTIMICROB CHEMOTH	2019	96	3.9	10.1093/jac/dkz028	5	Infectious Diseases; Microbiology; Pharmacology & Pharmacy	30770708	WOS:000482043300009
Virulence genes in isolates of Klebsiella pneumoniae from the UK during 2016, including among carbapenemase gene-positive hypervirulent K1-ST23 and 'non-hypervirulent' types ST147, ST15 and ST383	Turton, JF; Payne, Z; Coward, A; Hopkins, KL; Turton, JA; Doumith, M; Woodford, N	JOURNAL OF MEDICAL MICROBIOLOGY	English	Article	Klebsiella pneumoniae; hypervirulence; carbapenemase; rmpA; aerobactin; yersiniabactin; virulence plasmid	SEQUENCE TYPE 23; LIVER-ABSCESS; MULTIPLEX PCR; SEROTYPE K1; RESISTANCE; EMERGENCE; HYPERMUCOVISCOSITY; EXPANSION; REPEAT; OXA-48	Purpose. Klebsiella pneumoniae is a concern because of its multidrug resistance and the ability of hypervirulent types, especially capsular type K1-clonal complex 23 (K1-CC23), to cause community-acquired, life-threatening infections. Hypervirulent types carry an array of virulence genes including rmpA/rmpA2, coding for capsule up-regulation. We sought to identify isolates carrying these elements…	Public Health England	41	MICROBIOLOGY SOC	LONDON	J MED MICROBIOL	2018	96	2.4	10.1099/jmm.0.000653	11	Microbiology	29205138	WOS:000425273400014
MinION-based long-read sequencing and assembly extends the &ITCaenorhabditis elegans&IT reference genome	Tyson, JR; O'Neil, NJ; Jain, M; Olsen, HE; Hieter, P; Snutch, TP	GENOME RESEARCH	English	Article	/	CAENORHABDITIS-ELEGANS	Advances in long-read single molecule sequencing have opened new possibilities for 'benchtop' whole-genome sequencing. The Oxford Nanopore Technologies MinION is a portable device that uses nanopore technology that can directly sequence DNA molecules. MinION single molecule long sequence reads are well suited for de novo assembly of complex genomes as they facilitate the construction of highly co…	University of British Columbia; University of British Columbia; University of California System; University of California Santa Cruz; University of California System; University of California Santa Cruz; University of British Columbia	26	COLD SPRING HARBOR LAB PRESS, PUBLICATIONS DEPT	COLD SPRING HARBOR	GENOME RES	2018	95	6.2	10.1101/gr.221184.117	9	Biochemistry & Molecular Biology; Biotechnology & Applied Microbiology; Genetics & Heredity	29273626	WOS:000424537000012
Antimicrobial-Resistant Klebsiella pneumoniae Carriage and Infection in Specialized Geriatric Care Wards Linked to Acquisition in the Referring Hospital	Gorrie, CL; Mirceta, M; Wick, RR; Judd, LM; Wyres, KL; Thomson, NR; Strugnell, RA; Pratt, NF; Garlick, JS; Watson, KM; Hunter, PC; McGloughlin, SA; Spelman, DW; Jenney, AWJ; Holt, KE	CLINICAL INFECTIOUS DISEASES	English	Article	Klebsiella pneumoniae; genomic epidemiology; geriatric care; multidrug resistance; asymptomatic carriage	PUBLIC-HEALTH; RISK-FACTORS; PLASMIDS; ENTEROBACTERIACEAE; DISSEMINATION; BACTERIA; EPIDEMIOLOGY; SURVEILLANCE; PREVALENCE; FACILITIES	Background. Klebsiella pneumoniae is a leading cause of extended-spectrum beta-lactamase (ESBL)-producing hospital-associated infections, for which elderly patients are at increased risk. Methods. We conducted a 1-year prospective cohort study, in which a third of patients admitted to 2 geriatric wards in a specialized hospital were recruited and screened for carriage of K. pneumoniae by microbio…	University of Melbourne; University of Melbourne; Peter Doherty Institute; Alfred Health; Wellcome Trust Sanger Institute; Florey Institute of Neuroscience & Mental Health; Howard Florey Institute Affiliates; Alfred Health; Caulfield Hospital; Florey Institute of Neuroscience & Mental Health; Howard Florey Institute Affiliates; Florey Institute of Neuroscience & Mental Health; Howard Florey Insti…	39	OXFORD UNIV PRESS INC	CARY	CLIN INFECT DIS	2018	94	8.2	10.1093/cid/ciy027	10	Immunology; Infectious Diseases; Microbiology	29340588	WOS:000438504800005
Rapid, Sensitive, Full-Genome Sequencing of Severe Acute Respiratory Syndrome Coronavirus 2	Paden, CR; Tao, Y; Queen, K; Zhang, J; Li, Y; Uehara, A; Tong, SX	EMERGING INFECTIOUS DISEASES	English	Article	/	OUTBREAK	We describe validated protocols for generating high-quality, full-length severe acute respiratory syndrome coronavirus 2 genomes from primary samples. One protocol uses multiplex reverse transcription PCR, followed by MinION or MiSeq sequencing; the other uses singleplex, nested reverse transcription PCR and Sanger sequencing. These protocols enable sensitive virus sequencing in different laborat…	Centers for Disease Control & Prevention - USA; IHRC, Inc.; Oak Ridge Associated Universities; United States Department of Energy (DOE); Oak Ridge Institute for Science & Education	11	CENTERS DISEASE CONTROL & PREVENTION	ATLANTA	EMERG INFECT DIS	2020	93	7.2	10.3201/eid2610.20.1800	5	Immunology; Infectious Diseases	32610037	WOS:000572522100012
Hybrid Resistance and Virulence Plasmids in High-Risk Clones of Klebsiella pneumoniae, Including Those Carrying blaNDM-5	Turton, J; Davies, F; Turton, J; Perry, C; Payne, Z; Pike, R	MICROORGANISMS	English	Article	virulence plasmid; rmpA/rmpA2; carbapenemase; high-risk clone; Klebsiella pneumoniae; nanopore sequencing	ANTIMICROBIAL RESISTANCE; EVOLUTION	Virulence plasmids are associated with hypervirulent types of Klebsiella pneumoniae, which generally do not carry antibiotic resistance genes. In contrast, nosocomial isolates are often associated with resistance, but rarely with virulence plasmids. Here, we describe virulence plasmids in nosocomial isolates of high-risk clones of sequence types (STs) 15, 48, 101, 147 and 383 carrying carbapenema…	Public Health England; Imperial College London; Public Health England	22	MDPI	BASEL	MICROORGANISMS	2019	89	4.1	10.3390/microorganisms7090326	11	Microbiology	31500105	WOS:000489131300053
Rapid bacterial identification by direct PCR amplification of 16S rRNA genes using the MinION nanopore sequencer	Kai, S; Matsuo, Y; Nakagawa, S; Kryukov, K; Matsukawa, S; Tanaka, H; Iwai, T; Imanishi, T; Hirota, K	FEBS OPEN BIO	English	Article	16S rRNA; bacterial identification; direct PCR; MinION; nanopore sequencer	ENVIRONMENTAL-SAMPLES; CLINICAL MICROBIOLOGY; PHYLOGENETIC ANALYSIS; PATHOGENS; DIVERSITY	Rapid identification of bacterial pathogens is crucial for appropriate and adequate antibiotic treatment, which significantly improves patient outcomes. 16S ribosomal RNA (rRNA) gene amplicon sequencing has proven to be a powerful strategy for diagnosing bacterial infections. We have recently established a sequencing method and bioinformatics pipeline for 16S rRNA gene analysis utilizing the Oxfo…	Kyoto University; Kansai Medical University; Tokai University	38	WILEY	HOBOKEN	FEBS OPEN BIO	2019	86	2.8	10.1002/2211-5463.12590	10	Biochemistry & Molecular Biology	30868063	WOS:000461584100015
MinION nanopore sequencing of an influenza genome	Wang, J; Moore, NE; Deng, YM; Eccles, DA; Hall, RJ	FRONTIERS IN MICROBIOLOGY	English	Article	influenza; virus; nanopore sequencing; MinION; whole genome sequencing	SINGLE-MOLECULE; BACTERIAL; AMPLIFICATION; RESISTANCE	Influenza epidemics and pandemics have significant impacts on economies, morbidity and mortality worldwide. The ability to rapidly and accurately sequence influenza viruses is instrumental in the prevention and mitigation of influenza. All eight influenza genes from an influenza A virus were amplified by PCR simultaneously and then subjected to sequencing on a MinION nanopore sequencer. A complet…	Institute of Environmental Science & Research (ESR) - New Zealand; World Health Organization; Victorian Infectious Diseases Reference Laboratory; University of Melbourne; Peter Doherty Institute	31	FRONTIERS MEDIA SA	LAUSANNE	FRONT MICROBIOL	2015	79	4	10.3389/fmicb.2015.00766	7	Microbiology	26347715	WOS:000360023500001
Rapid Nanopore Sequencing of Plasmids and Resistance Gene Detection in Clinical Isolates	Lemon, JK; Khil, PP; Frank, KM; Dekker, JP	JOURNAL OF CLINICAL MICROBIOLOGY	English	Article	MinION; nanopore; antibiotic resistance; genomics; plasmids	REAL-TIME; ANTIMICROBIAL RESISTANCE; IDENTIFICATION; PATHOGENS; MINION; SURVEILLANCE; MECHANISMS; GENOMES; VIRUS; ZIKA	Recent advances in nanopore sequencing technology have led to a substantial increase in throughput and sequence quality. Together, these improvements may permit real-time benchtop genomic sequencing and antimicrobial resistance gene detection in clinical isolates. In this study, we evaluated workflows and turnaround times for a benchtop long-read sequencing approach in the clinical microbiology l…	National Institutes of Health (NIH) - USA; NIH Clinical Center (CC)	43	AMER SOC MICROBIOLOGY	WASHINGTON	J CLIN MICROBIOL	2017	79	6.1	10.1128/JCM.01069-17	14	Microbiology	29021151	WOS:000416225200024
Carriage of blaKPC-2 by a virulence plasmid in hypervirulent Klebsiella pneumoniae	Dong, N; Lin, DC; Zhang, R; Chan, EWC; Chen, S	JOURNAL OF ANTIMICROBIAL CHEMOTHERAPY	English	Article	/	ESCHERICHIA-COLI; SEROTYPE K1; STRAINS; MODEL	Objectives: To characterize a plasmid in a K1 hypervirulent Klebsiella pneumoniae (HvKP) strain encoding both hypervirulence and carbapenem resistance phenotypes. Methods: Plasmids from HvKP strain KP70-2 were subjected to whole-plasmid sequencing using both the Illumina NextSeq 500 sequencing platform and Nanopore MinION sequencer platforms. Results: A hybrid virulence- and resistance-encoding p…	Hong Kong Polytechnic University; Hong Kong Polytechnic University; Zhejiang University	21	OXFORD UNIV PRESS	OXFORD	J ANTIMICROB CHEMOTH	2018	77	3.9	10.1093/jac/dky358	5	Infectious Diseases; Microbiology; Pharmacology & Pharmacy	30239821	WOS:000452916600013
Recent and emerging technologies for the rapid diagnosis of infection and antimicrobial resistance	Trotter, AJ; Aydin, A; Strinden, MJ; O'Grady, J	CURRENT OPINION IN MICROBIOLOGY	English	Review	/	POSITIVE BLOOD CULTURES; MULTICENTER EVALUATION; PANEL; IDENTIFICATION; SYSTEM; IMPACT; BACTERIA; GENOME; ENCEPHALITIS; PNEUMONIA	The rise in antimicrobial resistance (AMR) is predicted to cause 10 million deaths per year by 2050 unless steps are taken to prevent this looming crisis. Microbiological culture is the gold standard for the diagnosis of bacterial/fungal pathogens and antimicrobial resistance and takes 48 hours or longer. Hence, antibiotic prescriptions are rarely based on a definitive diagnosis and patients ofte…	University of East Anglia; UK Research & Innovation (UKRI); Biotechnology and Biological Sciences Research Council (BBSRC); Quadram Institute	64	CURRENT BIOLOGY LTD	LONDON	CURR OPIN MICROBIOL	2019	75	5.9	10.1016/j.mib.2019.03.001	7	Microbiology	31077935	WOS:000504780400007
Comprehensive subspecies identification of 175 nontuberculous mycobacteria species based on 7547 genomic profiles	Matsumoto, Y; Kinjo, T; Motooka, D; Nabeya, D; Jung, N; Uechi, K; Horii, T; Iida, T; Fujita, J; Nakamura, S	EMERGING MICROBES & INFECTIONS	English	Article	Nontuberculous mycobacteria; multi-locus sequence typing; next-generation sequencing; comparative genomics; pulmonary diseases	MASS-SPECTROMETRY; ABSCESSUS; EPIDEMIOLOGY; ALIGNMENT; TUBERCULOSIS	The prevalence of nontuberculous mycobacteria (NTM) pulmonary diseases has been increasing worldwide. NTM consist of approximately 200 species and distinguishing between them at the subspecies level is critical to treatment. In this study, we sequenced 63 NTM genomes, 27 of which were newly determined, by hybrid assembly using sequencers from Illumina and Oxford Nanopore Technologies (ONT). This …	The University of Osaka; University of the Ryukyus; The University of Osaka; University of the Ryukyus; The University of Osaka	47	TAYLOR & FRANCIS LTD	ABINGDON	EMERG MICROBES INFEC	2019	74	8.4	10.1080/22221751.2019.1637702	11	Immunology; Infectious Diseases; Microbiology	31287781	WOS:000474709700003
Rapid identification of pathogens, antibiotic resistance genes and plasmids in blood cultures by nanopore sequencing	Taxt, AM; Avershina, E; Frye, SA; Naseer, U; Ahmad, R	SCIENTIFIC REPORTS	English	Article	/	STREAM INFECTIONS; THERAPY; SEPSIS; TIME	Bloodstream infections (BSI) and sepsis are major causes of morbidity and mortality worldwide. Blood culture-based diagnostics usually requires 1-2 days for identification of bacterial agent and an additional 2-3 days for phenotypic determination of antibiotic susceptibility pattern. With the escalating burden of antimicrobial resistance (AMR) rapid diagnostics becomes increasingly important to s…	University of Oslo; Inland Norway University of Applied Sciences; Norwegian Institute of Public Health (NIPH); UiT The Arctic University of Tromso	32	NATURE PORTFOLIO	BERLIN	SCI REP-UK	2020	73	3.8	10.1038/s41598-020-64616-x	11	Science & Technology - Other Topics	32376847	WOS:000534022100015
Genetic Biomonitoring and Biodiversity Assessment Using Portable Sequencing Technologies: Current Uses and Future Directions	Krehenwinkel, H; Pomerantz, A; Prost, S	GENES	English	Review	portable sequencing; nanopore sequencing; biodiversity monitoring; local capacity building; MinION; DNA barcoding; long read sequencing	INTERNAL TRANSCRIBED SPACER; ENVIRONMENTAL DNA; CONSERVATION; GENOMICS; ECOLOGY; BARCODE; MINION; SYSTEM; COST	We live in an era of unprecedented biodiversity loss, affecting the taxonomic composition of ecosystems worldwide. The immense task of quantifying human imprints on global ecosystems has been greatly simplified by developments in high-throughput DNA sequencing technology (HTS). Approaches like DNA metabarcoding enable the study of biological communities at unparalleled detail. However, current pr…	Universitat Trier; University of California System; University of California Berkeley; Marine Biological Laboratory - Woods Hole; Leibniz Association; Senckenberg Gesellschaft fur Naturforschung (SGN); South African National Biodiversity Institute	93	MDPI	BASEL	GENES-BASEL	2019	70	2.8	10.3390/genes10110858	16	Genetics & Heredity	31671909	WOS:000502296000024
Illumina and Nanopore methods for whole genome sequencing of hepatitis B virus (HBV)	McNaughton, AL; Roberts, HE; Bonsall, D; de Cesare, M; Mokaya, J; Lumley, SF; Golubchik, T; Piazza, P; Martin, JB; de Lara, C; Brown, A; Ansari, MA; Bowden, R; Barnes, E; Matthews, PC	SCIENTIFIC REPORTS	English	Article	/	ROLLING CIRCLE AMPLIFICATION; QUASI-SPECIES EVOLUTION; REAL-TIME; TOOL; DNA	Advancing interventions to tackle the huge global burden of hepatitis B virus (HBV) infection depends on improved insights into virus epidemiology, transmission, within-host diversity, drug resistance and pathogenesis, all of which can be advanced through the large-scale generation of full-length virus genome data. Here we describe advances to a protocol that exploits the circular HBV genome stru…	University of Oxford; University of Oxford; Wellcome Centre for Human Genetics; Oxford University Hospitals NHS Foundation Trust; University of Oxford; Imperial College London; University of Oxford; Oxford University Hospitals NHS Foundation Trust; University of Oxford; Oxford University Hospitals NHS Foundation Trust; Oxford University Hospitals NHS Foundation Trust; University of Oxford	37	NATURE PORTFOLIO	BERLIN	SCI REP-UK	2019	70	3.8	10.1038/s41598-019-43524-9	14	Science & Technology - Other Topics	31068626	WOS:000467369200019
A portable system for rapid bacterial composition analysis using a nanopore-based sequencer and laptop computer	Mitsuhashi, S; Kryukov, K; Nakagawa, S; Takeuchi, JS; Shiraishi, Y; Asano, K; Imanishi, T	SCIENTIFIC REPORTS	English	Article	/	/	We developed a portable system for 16S rDNA analyses consisting of a nanopore technology-based sequencer, the MinION, and laptop computers, and assessed its potential ability to determine bacterial compositions rapidly. We tested our protocols using a mock bacterial community that contained equimolar 16S rDNA and a pleural effusion from a patient with empyema, for time effectiveness and accuracy.…	Tokai University; Tokai University	17	NATURE PORTFOLIO	BERLIN	SCI REP-UK	2017	70	3.8	10.1038/s41598-017-05772-5	9	Science & Technology - Other Topics	28720805	WOS:000405745900008
Challenges and opportunities for whole-genome sequencing- based surveillance of antibiotic resistance	Schürch, AC; van Schaik, W	ANNALS OF THE NEW YORK ACADEMY OF SCIENCES	English	Article	antibiotic resistance; genomics; bioinformatics; Klebsiella pneumoniae; mcr-1	KLEBSIELLA-PNEUMONIAE; ANTIMICROBIAL RESISTANCE; COLISTIN-RESISTANCE; ESCHERICHIA-COLI; MYCOBACTERIUM-TUBERCULOSIS; REAL-TIME; STAPHYLOCOCCUS-AUREUS; GLOBAL DISSEMINATION; MICROBIAL GENOMES; PUBLIC-HEALTH	Infections caused by drug-resistant bacteria are increasingly reported across the planet, and drug-resistant bacteria are recognized to be a major threat to public health and modern medicine. In this review, we discuss how whole-genome sequencing (WGS)-based approaches can contribute to the surveillance of the emergence and spread of antibiotic resistance. We outline the characteristics of sequen…	Utrecht University; Utrecht University Medical Center	113	WILEY	HOBOKEN	ANN NY ACAD SCI	2017	69	4.1	10.1111/nyas.13310	13	Science & Technology - Other Topics	28134443	WOS:000398801100008
Improved high-molecular-weight DNA extraction, nanopore sequencing and metagenomic assembly from the human gut microbiome	Maghini, DG; Moss, EL; Vance, SE; Bhatt, AS	NATURE PROTOCOLS	English	Article	/	/	Short-read metagenomic sequencing and de novo genome assembly of the human gut microbiome can yield draft bacterial genomes without isolation and culture. However, bacterial genomes assembled from short-read sequencing are often fragmented. Furthermore, these metagenome-assembled genomes often exclude repeated genomic elements, such as mobile genetic elements, compromising our understanding of th…	Stanford University; Stanford University; Stanford University	31	NATURE RESEARCH	BERLIN	NAT PROTOC	2021	69	13.1	10.1038/s41596-020-00424-x	14	Biochemistry & Molecular Biology	33277629	WOS:000599028300001
Comparison of Illumina versus Nanopore 16S rRNA Gene Sequencing of the Human Nasal Microbiota	Heikema, AP; Horst-Kreft, D; Boers, SA; Jansen, R; Hiltemann, SD; de Koning, W; Kraaij, R; de Ridder, MAJ; van Houten, CB; Bont, LJ; Stubbs, AP; Hays, JP	GENES	English	Article	nasal microbiota; Illumina sequencing; nanopore sequencing; 16S rRNA gene; bacterial species; Corynebacterium	STAPHYLOCOCCUS-EPIDERMIDIS; IDENTIFICATION; RISK	Illumina and nanopore sequencing technologies are powerful tools that can be used to determine the bacterial composition of complex microbial communities. In this study, we compared nasal microbiota results at genus level using both Illumina and nanopore 16S rRNA gene sequencing. We also monitored the progression of nanopore sequencing in the accurate identification of species, using pure, single…	Erasmus University Rotterdam; Erasmus MC; Leiden University; Leiden University Medical Center (LUMC); Erasmus University Rotterdam; Erasmus MC; Erasmus University Rotterdam; Erasmus MC; Erasmus University Rotterdam; Erasmus MC; Utrecht University; Utrecht University Medical Center	36	MDPI	BASEL	GENES-BASEL	2020	68	2.8	10.3390/genes11091105	17	Genetics & Heredity	32967250	WOS:000581862900001
Tracking microevolution events among ST11 carbapenemase-producing hypervirulent Klebsiella pneumoniae outbreak strains	Dong, N; Yang, XM; Zhang, R; Chan, EWC; Chen, S	EMERGING MICROBES & INFECTIONS	English	Article	/	COLISTIN RESISTANCE; EMERGENCE; SEQUENCE; ISOLATE; IDENTIFICATION; INACTIVATION; VIRULENCE; GENES; CLONE	The recent convergence of genetic elements encoding phenotypic carbapenem-resistance and hypervirulence within a single Klebsiella pneumoniae host strain represents a major public concern. To obtain a better understanding of the genetic characteristic of this emerging 'superbug', the complete genomes of 3 isolates of ST11 carbapenemase-producing hypervirulent K. pneumoniae were generated using th…	Hong Kong Polytechnic University; Hong Kong Polytechnic University; Zhejiang University	34	TAYLOR & FRANCIS LTD	ABINGDON	EMERG MICROBES INFEC	2018	66	8.4	10.1038/s41426-018-0146-6	8	Immunology; Infectious Diseases; Microbiology	30100608	WOS:000441817800001
Early insights into the potential of the Oxford Nanopore MinION for the detection of antimicrobial resistance genes	Judge, K; Harris, SR; Reuter, S; Parkhill, J; Peacock, SJ	JOURNAL OF ANTIMICROBIAL CHEMOTHERAPY	English	Article	/	/	Objectives: Genome sequencing will be increasingly used in the clinical setting to tailor antimicrobial prescribing and inform infection control outbreaks. A recent technological innovation that could reduce the delay between pathogen sampling and data generation is single molecule sequencing. An example of this technology, which is undergoing evaluation through an early access programme, is the …	University of Cambridge; Wellcome Trust Sanger Institute; Public Health England	11	OXFORD UNIV PRESS	OXFORD	J ANTIMICROB CHEMOTH	2015	66	3.9	10.1093/jac/dkv206	4	Infectious Diseases; Microbiology; Pharmacology & Pharmacy	26221019	WOS:000363249800014
Metagenomic identification of severe pneumonia pathogens in mechanically-ventilated patients: a feasibility and clinical validity study	Yang, LB; Haidar, G; Zia, H; Nettles, R; Qin, SL; Wang, XH; Shah, F; Rapport, SF; Charalampous, T; Methé, B; Fitch, A; Morris, A; McVerry, BJ; O'Grady, J; Kitsios, GD	RESPIRATORY RESEARCH	English	Article	Nanopore; Metagenomics sequencing; Pneumonia; Pathogen detection; Mechanical ventilation	COMMUNITY-ACQUIRED PNEUMONIA; REAL-TIME; BACTERIAL; DIAGNOSTICS; LAVAGE	Background Metagenomic sequencing of respiratory microbial communities for pathogen identification in pneumonia may help overcome the limitations of culture-based methods. We examined the feasibility and clinical validity of rapid-turnaround metagenomics with Nanopore (TM) sequencing of clinical respiratory specimens. Methods We conducted a case-control study of mechanically-ventilated patients w…	Pennsylvania Commonwealth System of Higher Education (PCSHE); University of Pittsburgh; Pennsylvania Commonwealth System of Higher Education (PCSHE); University of Pittsburgh; Pennsylvania Commonwealth System of Higher Education (PCSHE); University of Pittsburgh; UPMC Presbyterian; Pennsylvania Commonwealth System of Higher Education (PCSHE); University of Pittsburgh; Pennsylvania Commonwealth Sy…	41	BMC	LONDON	RESP RES	2019	66	/	10.1186/s12931-019-1218-4	12	Respiratory System	31775777	WOS:000499410400002
Assessment of metagenomic Nanopore and Illumina sequencing for recovering whole genome sequences of chikungunya and dengue viruses directly from clinical samples	Kafetzopoulou, LE; Efthymiadis, K; Lewandowski, K; Crook, A; Carter, D; Osborne, J; Aarons, E; Hewson, R; Hiscox, JA; Carroll, MW; Vipond, R; Pullan, ST	EUROSURVEILLANCE	English	Article	/	ZIKA VIRUS; REAL-TIME; MINION; EBOLA; EPIDEMIOLOGY; TRANSMISSION; EVOLUTION; BRAZIL; RNA	Background: The recent global emergence and re-emergence of arboviruses has caused significant human disease. Common vectors, symptoms and geographical distribution make differential diagnosis both important and challenging. Aim: To investigate the feasibility of metagenomic sequencing for recovering whole genome sequences of chikungunya and dengue viruses from clinical samples. Methods: We perfo…	Public Health England; Vrije Universiteit Brussel; Public Health England; University of Liverpool	44	EUR CENTRE DIS PREVENTION & CONTROL	STOCKHOLM	EUROSURVEILLANCE	2018	64	10	10.2807/1560-7917.ES.2018.23.50.1800228	13	Infectious Diseases	30563591	WOS:000453031200004
Carbapenemase-producing Enterobacterales causing secondary infections during the COVID-19 crisis at a New York City hospital	Gomez-Simmonds, A; Annavajhala, MK; McConville, TH; Dietz, DE; Shoucri, SM; Laracy, JC; Rozenberg, FD; Nelson, B; Greendyke, WG; Furuya, EY; Whittier, S; Uhlemann, AC	JOURNAL OF ANTIMICROBIAL CHEMOTHERAPY	English	Article	/	RESISTANCE; BACTERIAL; TOOL	Background: Patients with COVID-19 may be at increased risk for secondary bacterial infections with MDR pathogens, including carbapenemase-producing Enterobacterales (CPE). Objectives: We sought to rapidly investigate the clinical characteristics, population structure and mechanisms of resistance of CPE causing secondary infections in patients with COVID-19. Methods: We retrospectively identified…	NewYork-Presbyterian Hospital; Columbia University; Columbia University; NewYork-Presbyterian Hospital	17	OXFORD UNIV PRESS	OXFORD	J ANTIMICROB CHEMOTH	2021	64	3.9	10.1093/jac/dkaa466	5	Infectious Diseases; Microbiology; Pharmacology & Pharmacy	33202023	WOS:000620813200014
Evolution of carbapenem resistance in Acinetobacter baumannii during a prolonged infection	Hawkey, J; Ascher, DB; Judd, LM; Wick, RR; Kostoulias, X; Cleland, H; Spelman, DW; Padiglione, A; Peleg, AY; Holt, KE	MICROBIAL GENOMICS	English	Article	Acinetobacter baumannii; carbapenem resistance; meropenem; adeB; ftsI; microevolution	EFFLUX PUMP; AMPC GENE; ANTIMICROBIAL RESISTANCE; CIPROFLOXACIN RESISTANCE; NOSOCOMIAL PATHOGENS; PROTEIN STABILITY; MUTATIONS; TIGECYCLINE; SEQUENCE; SERVER	Acinetobacter baumannii is a common causative agent of hospital-acquired infections and a leading cause of infection in burns patients. Carbapenem-resistant A. baumannii is considered a major public-health threat and has been identified by the World Health Organization as the top priority organism requiring new antimicrobials. The most common mechanism for carbapenem resistance in A. baumannii is…	University of Melbourne; Monash University; Monash University; Florey Institute of Neuroscience & Mental Health; Howard Florey Institute Affiliates; Monash University; Florey Institute of Neuroscience & Mental Health; Howard Florey Institute Affiliates; Monash University	62	MICROBIOLOGY SOC	LONDON	MICROB GENOMICS	2018	64	4	10.1099/mgen.0.000165	11	Genetics & Heredity; Microbiology	29547094	WOS:000431156100009
Streaming algorithms for identification of pathogens and antibiotic resistance potential from real-time MinION™ sequencing	Cao, MD; Ganesamoorthy, D; Elliott, AG; Zhang, HH; Cooper, MA; Coin, LJM	GIGASCIENCE	English	Article	Nanopore sequencing; Real-time analysis; Pathogen identification; Antibiotic resistance	NANOPORE SEQUENCER; NEXT-GENERATION; ALIGNMENT; GENES; PROTEIN	The recently introduced Oxford Nanopore MinION platform generates DNA sequence data in real-time. This has great potential to shorten the sample-to-results time and is likely to have benefits such as rapid diagnosis of bacterial infection and identification of drug resistance. However, there are few tools available for streaming analysis of real-time sequencing data. Here, we present a framework …	University of Queensland; Imperial College London	49	OXFORD UNIV PRESS	OXFORD	GIGASCIENCE	2016	63	11.8	10.1186/s13742-016-0137-2	16	Life Sciences & Biomedicine - Other Topics; Science & Technology - Other Topics	27457073	WOS:000380152500001
Rapid inference of antibiotic resistance and susceptibility by genomic neighbour typing	Brinda, K; Callendrello, A; Ma, KC; MacFadden, DR; Charalampous, T; Lee, RS; Cowley, L; Wadsworth, CB; Grad, YH; Kucherov, G; O'Grady, J; Baym, M; Hanage, WP	NATURE MICROBIOLOGY	English	Article	/	STREPTOCOCCUS-PNEUMONIAE; UNITED-STATES; GENES; IDENTIFICATION; EPIDEMIOLOGY; SURVEILLANCE; CLONES; TOOL	Genomic neighbour typing can be used to infer the antimicrobial susceptibility and resistance of a bacterial sample based on the genomes of closest relatives. Combined with MinION sequencing, it can rapidly determine microbial resistance for clinical samples within 4 h. Surveillance of drug-resistant bacteria is essential for healthcare providers to deliver effective empirical antibiotic therapy.…	Harvard University; Harvard T.H. Chan School of Public Health; Harvard University; Harvard Medical School; Harvard University; Harvard Medical School; Harvard University; Harvard T.H. Chan School of Public Health; University of Toronto; University of East Anglia; University of Toronto; University of Bath; Rochester Institute of Technology; Universite Gustave-Eiffel; ESIEE Paris; Institut Polytech…	72	NATURE PORTFOLIO	BERLIN	NAT MICROBIOL	2020	62	20.5	10.1038/s41564-019-0656-6	18	Microbiology	32042129	WOS:000512527600003
Rapid Spread of Severe Acute Respiratory Syndrome Coronavirus 2 (SARS-CoV-2) Omicron Subvariant BA.2 in a Single-Source Community Outbreak	Cheng, VCC; Ip, JD; Chu, AWH; Tam, AR; Chan, WM; Abdullah, SMU; Chan, BPC; Wong, SC; Kwan, MYW; Chua, GT; Ip, P; Chan, JMC; Lam, BHS; To, WK; Chuang, VWM; Yuen, KY; Hung, IFN; To, KKW	CLINICAL INFECTIOUS DISEASES	English	Article	COVID-19; SARS-CoV-2 Omicron variant; BA; 2 sublineage; community outbreak; housing estate	VARIANT	Background The severe acute respiratory syndrome coronavirus 2 (SARS-CoV-2) Omicron variant BA.2 sublineage has increased rapidly in Europe and Asia since January 2022. Here, we report the epidemiological and genomic analysis of a large single-source BA.2 outbreak in a housing estate. Methods We analyzed the epidemiological information on a community outbreak of BA.2 (STY outbreak). We performed …	University of Hong Kong; University of Hong Kong; University of Hong Kong; University of Hong Kong; University of Hong Kong; University of Hong Kong; University of Hong Kong	29	OXFORD UNIV PRESS INC	CARY	CLIN INFECT DIS	2022	61	8.2	10.1093/cid/ciac203	6	Immunology; Infectious Diseases; Microbiology	35271728	WOS:000803585900001
Long-Read Sequencing - A Powerful Toll in Viral Transcriptome Research	Boldogkoi, Z; Moldován, N; Balázs, Z; Snyder, M; Tombácz, D	TRENDS IN MICROBIOLOGY	English	Review	/	MESSENGER-RNA; HUMAN CYTOMEGALOVIRUS; HUMAN GENOME; VIRUS; TRANSLATION; ACCURATE; ARCHITECTURE; HERPESVIRUS; REVEALS; NUCLEAR	Long-read sequencing (LRS) has become increasingly popular due to its strengths in de novo assembly and in resolving complex DNA regions as well as in determining full-length RNA molecules. Two important LRS technologies have been developed during the past few years, including single-molecule, real-time sequencing by Pacific Biosciences, and nanopore sequencing by Oxford Nanopore Technologies. Al…	Szeged University; Stanford University; Stanford Medicine	98	ELSEVIER SCI LTD	OXFORD	TRENDS MICROBIOL	2019	61	14	10.1016/j.tim.2019.01.010	15	Biochemistry & Molecular Biology; Microbiology	30824172	WOS:000470969400005
Rapid Next-Generation Sequencing-Based Diagnostics of Bacteremia in Septic Patients	Grumaz, C; Hoffmann, A; Vainshtein, Y; Kopp, M; Grumaz, S; Stevens, P; Decker, SO; Weigand, MA; Hofer, S; Brenner, T; Sohn, K	JOURNAL OF MOLECULAR DIAGNOSTICS	English	Article	/	READ ALIGNMENT; SEPSIS; MORTALITY; IDENTIFICATION; TIME	The increasing incidence of bloodstream infections including sepsis is a major challenge in intensive care units worldwide. However, current diagnostics for pathogen identification mainly depend on culture- and molecular-based approaches, which are not satisfactory regarding specificity, sensitivity, and time to diagnosis. Herein, we established a complete diagnostic workflow for real-time high t…	Fraunhofer Gesellschaft; Fraunhofer Germany; Fraunhofer Interfacial Engineering & Biotechnology; Ruprecht Karls University Heidelberg; Westpfalz-Klinikum GmbH	42	ELSEVIER SCIENCE INC	NEW YORK	J MOL DIAGN	2020	60	3.4	10.1016/j.jmoldx.2019.12.006	14	Pathology	32146977	WOS:000520947900011
Comparison of R9.4.1/Kit10 and R10/Kit12 Oxford Nanopore flowcells and chemistries in bacterial genome reconstruction	Sanderson, ND; Kapel, N; Rodger, G; Webster, H; Lipworth, S; Street, TL; Peto, T; Crook, D; Stoesser, N	MICROBIAL GENOMICS	English	Article	Genome sequencing; hybrid assembly; long-read assembly	/	Complete, accurate, cost-effective, and high-throughput reconstruction of bacterial genomes for large-scale genomic epidemiological studies is currently only possible with hybrid assembly, combining long- (typically using nanopore sequencing) and short-read (Illumina) datasets. Being able to use nanopore-only data would be a significant advance. Oxford Nanopore Technologies (ONT) have recently re…	University of Oxford; University of Oxford; Public Health England; University of Oxford	20	MICROBIOLOGY SOC	LONDON	MICROB GENOMICS	2023	56	4	10.1099/mgen.0.000910	15	Genetics & Heredity; Microbiology	36748454	WOS:001135304900001
Detection of Viral Pathogens With Multiplex Nanopore MinION Sequencing: Be Careful With Cross-Talk	Xu, YF; Lewandowski, K; Lumley, S; Pullan, S; Vipond, R; Carroll, M; Foster, D; Matthews, PC; Peto, T; Crook, D	FRONTIERS IN MICROBIOLOGY	English	Article	nanopore sequencing; metagenomics; multiplexing; cross barcode contamination; chimera	METAGENOMIC IDENTIFICATION; CLINICAL-SAMPLES	Metagenomic sequencing with the Oxford Nanopore MinION sequencer offers potential for point-of-care testing of infectious diseases in clinical settings. To improve cost-effectiveness, multiplexing of several, barcoded samples upon a single flow cell will be required during sequencing. We generated a unique sequencing dataset to assess the extent and source of cross barcode contamination caused by…	University of Oxford; University of Oxford; Public Health England; University of Oxford; Oxford University Hospitals NHS Foundation Trust; University of Oxford	18	FRONTIERS MEDIA SA	LAUSANNE	FRONT MICROBIOL	2018	51	4	10.3389/fmicb.2018.02225	7	Microbiology	30283430	WOS:000445013400001
Parallel ClickSeq and Nanopore sequencing elucidates the rapid evolution of defective-interfering RNAs in Flock House virus	Jaworski, E; Routh, A	PLOS PATHOGENS	English	Article	/	REAL-TIME; IN-VIVO; RECOMBINATION; REPLICATION; GENERATION; GENOME; CELLS; REQUIREMENTS; CORONAVIRUS; PERSISTENCE	Defective-Interfering RNAs (DI-RNAs) have long been known to play an important role in virus replication and transmission. DI-RNAs emerge during virus passaging in both cell-culture and their hosts as a result of non-homologous RNA recombination. However, the principles of DI-RNA emergence and their subsequent evolution have remained elusive. Using a combination of long-and short-read Next-Genera…	University of Texas System; University of Texas Medical Branch Galveston; University of Texas System; University of Texas Medical Branch Galveston	70	PUBLIC LIBRARY SCIENCE	SAN FRANCISCO	PLOS PATHOG	2017	51	5.5	10.1371/journal.ppat.1006365	31	Microbiology; Parasitology; Virology	28475646	WOS:000402877700023
Antimicrobial resistance prediction and phylogenetic analysis of Neisseria gonorrhoeae isolates using the Oxford Nanopore MinION sequencer	Golparian, D; Donà, V; Sánchez-Busó, L; Foerster, S; Harris, S; Endimiani, A; Low, N; Unemo, M	SCIENTIFIC REPORTS	English	Article	/	AZITHROMYCIN RESISTANCE; SUSCEPTIBILITY; IDENTIFICATION; CEFTRIAXONE	Antimicrobial resistance (AMR) in Neisseria gonorrhoeae is common, compromising gonorrhoea treatment internationally. Rapid characterisation of AMR strains could ensure appropriate and personalised treatment, and support identification and investigation of gonorrhoea outbreaks in nearly real-time. Whole-genome sequencing is ideal for investigation of emergence and dissemination of AMR determinant…	Orebro University; University of Bern; Wellcome Trust Sanger Institute; University of Bern; University of Bern	63	NATURE PORTFOLIO	BERLIN	SCI REP-UK	2018	51	3.8	10.1038/s41598-018-35750-4	12	Science & Technology - Other Topics	30514867	WOS:000452084600004
Emergence of Ceftazidime- and Avibactam-Resistant Klebsiella pneumoniae Carbapenemase-Producing Pseudomonas aeruginosa in China	Zhu, YW; Chen, J; Shen, H; Chen, ZJ; Yang, QW; Zhu, J; Li, X; Yang, Q; Zhao, F; Ji, JS; Cai, H; Li, Y; Zhang, LH; Leptihn, S; Hua, XT; Yu, YS	MSYSTEMS	English	Article	carbapenem-resistant Pseudomonas aeruginosa; bla(KPC-2); ceftazidime-avibactam; Pseudomonas aeruginosa	COMBINATIONS; GENERATION; SEQUENCE	Klebsiella pneumoniae carbapenemase (KPC)-producing Pseudomonas aeruginosa (KPC-PA) has been reported sporadically. However, epidemiological and antimicrobial susceptibility data specific for KPC-PA are lacking. We collected 374 carbapenem-resistant P. aeruginosa (CRPA) isolates from seven hospitals in China from June 2016 to February 2019 and identified the bla(KPC-2) gene in 40.4% (n = 151/374)…	Zhejiang University; Zhejiang University; Nanjing University; Huazhong University of Science & Technology; Chinese Academy of Medical Sciences - Peking Union Medical College; Chinese Academy of Medical Sciences - Peking Union Medical College; Peking Union Medical College; Peking Union Medical College Hospital; Wenzhou Medical University; Hangzhou Medical College; Zhejiang Provincial People's Hosp…	54	AMER SOC MICROBIOLOGY	WASHINGTON	MSYSTEMS	2021	50	5	10.1128/mSystems.00787-21	12	Microbiology	34726488	WOS:000734744600008
Low Bifidobacterium Abundance in the Lower Gut Microbiota Is Associated With Helicobacter pylori-Related Gastric Ulcer and Gastric Cancer	Devi, TB; Devadas, K; George, M; Gandhimathi, A; Chouhan, D; Retnakumar, RJ; Alexander, SM; Varghese, J; Dharmaseelan, S; Chandrika, SK; Jissa, VT; Das, B; Nair, GB; Chattopadhyay, S	FRONTIERS IN MICROBIOLOGY	English	Article	H; pylori; gastric ulcer and cancer; gut microbiome; Bifidobacterium; probiotic	VACUOLATING CYTOTOXIN; INTERMEDIATE REGION; ERADICATION THERAPY; METAANALYSIS; PROBIOTICS; BACTERIA; CAGA; PCR	Helicobacter pylori infection in stomach leads to gastric cancer, gastric ulcer, and duodenal ulcer. More than 1 million people die each year due to these diseases, but why most H. pylori-infected individuals remain asymptomatic while a certain proportion develops such severe gastric diseases remained an enigma. Several studies indicated that gastric and intestinal microbiota may play a critical …	Department of Biotechnology (DBT) India; Rajiv Gandhi Centre for Biotechnology (RGCB); Manipal Academy of Higher Education (MAHE); Department of Science & Technology (India); Sree Chitra Tirunal Institute for Medical Sciences Technology (SCTIMST); Department of Biotechnology (DBT) India; Translational Health Science & Technology Institute (THSTI)	51	FRONTIERS MEDIA SA	LAUSANNE	FRONT MICROBIOL	2021	48	4	10.3389/fmicb.2021.631140	14	Microbiology	33717022	WOS:000627775200001
Nanopore sequencing for fast determination of plasmids, phages, virulence markers, and antimicrobial resistance genes in Shiga toxin-producing Escherichia coli	González-Escalona, N; Allard, MA; Brown, EW; Sharma, S; Hoffmann, M	PLOS ONE	English	Article	/	REAL-TIME; GENOME; OUTBREAK; CATTLE; O26; IDENTIFICATION; VISUALIZATION; PATHOGENS; MINION; CLONE	Whole genome sequencing can provide essential public health information. However, it is now known that widely used short-read methods have the potential to miss some randomly-distributed segments of genomes. This can prevent phages, plasmids, and virulence factors from being detected or properly identified. Here, we compared assemblies of three complete Shiga toxin-producing Escherichia coli (STE…	US Food & Drug Administration (FDA)	62	PUBLIC LIBRARY SCIENCE	SAN FRANCISCO	PLOS ONE	2019	48	2.9	10.1371/journal.pone.0220494	21	Science & Technology - Other Topics	31361781	WOS:000484981300034
Identification of pathogens in culture-negative infective endocarditis cases by metagenomic analysis	Cheng, J; Hu, H; Kang, Y; Chen, WZ; Fang, W; Wang, KJ; Zhang, Q; Fu, AS; Zhou, SL; Cheng, C; Cao, QQ; Wang, FY; Lee, S; Zhou, Z	ANNALS OF CLINICAL MICROBIOLOGY AND ANTIMICROBIALS	English	Article	Metagenomic analysis; Nanopore sequencing; Next-generation sequencing; Infective endocarditis	DIAGNOSIS; MICROORGANISMS	BackgroundPathogens identification is critical for the proper diagnosis and precise treatment of infective endocarditis (IE). Although blood and valve cultures are the gold standard for IE pathogens detection, many cases are culture-negative, especially in patients who had received long-term antibiotic treatment, and precise diagnosis has therefore become a major challenge in the clinic. Metageno…	Chinese Academy of Medical Sciences - Peking Union Medical College; Fu Wai Hospital - CAMS; Chinese Academy of Medical Sciences - Peking Union Medical College; Peking Union Medical College; Chinese Academy of Medical Sciences - Peking Union Medical College; Fu Wai Hospital - CAMS; Ministry of Education - China; Wuhan University; Wuhan University	18	BMC	LONDON	ANN CLIN MICROB ANTI	2018	47	4.6	10.1186/s12941-018-0294-5	11	Microbiology	30567558	WOS:000453843200001
Genomic, epidemiological and digital surveillance of Chikungunya virus in the Brazilian Amazon	Naveca, FG; Claro, I; Giovanetti, M; de Jesus, JG; Xavier, J; Iani, FCD; do Nascimento, VA; de Souza, VC; Silveira, PP; Lourenço, J; Santillana, M; Kraemer, MUG; Quick, J; Hill, SC; Thézé, J; Carvalho, RDD; Azevedo, V; Salles, FCD; Nunes, MRT; Lemos, PD; Candido, DD; Pereira, GD; Oliveira, MAA; Meneses, CAR; Maito, RM; Cunha, CRS; Campos, DPD; Castilho, MD; Siqueira, TCD; Terra, TM; de Albuquerqu…	PLOS NEGLECTED TROPICAL DISEASES	English	Article	/	MAYARO VIRUS; POPULATION-DYNAMICS; MATO-GROSSO; ZIKA VIRUS; OUTBREAK; INFERENCE; EMERGENCE; OROPOUCHE; DISEASE; ILLNESS	Background Since its first detection in the Caribbean in late 2013, chikungunya virus (CHIKV) has affected 51 countries in the Americas. The CHIKV epidemic in the Americas was caused by the CHIKV-Asian genotype. In August 2014, local transmission of the CHIKV-Asian genotype was detected in the Brazilian Amazon region. However, a distinct lineage, the CHIKV-East-Central-South-America (ECSA)-genoty…	Fundacao Oswaldo Cruz; Universidade de Sao Paulo; Universidade de Sao Paulo; Fundacao Oswaldo Cruz; Universidade Federal de Minas Gerais; Fundacao Oswaldo Cruz; Universidade Federal do Rio de Janeiro; University of Oxford; Harvard University; Harvard Medical School; Harvard University; Harvard University Medical Affiliates; Boston Children's Hospital; Harvard University; Harvard University Medica…	79	PUBLIC LIBRARY SCIENCE	SAN FRANCISCO	PLOS NEGLECT TROP D	2019	47	3.4	10.1371/journal.pntd.0007065	21	Infectious Diseases; Parasitology; Tropical Medicine	30845267	WOS:000463799300007
Rapid multiplex MinION nanopore sequencing workflow for Influenza A viruses	King, J; Harder, T; Beer, M; Pohlmann, A	BMC INFECTIOUS DISEASES	English	Article	Nanopore sequencing; MinION; Influenza A viruses; Full genome sequencing; Next-generation sequencing; Avian influenza viruses; Multiplexing	/	Background Due to the frequent reassortment and zoonotic potential of influenza A viruses, rapid gain of sequence information is crucial. Alongside established next-generation sequencing protocols, the MinION sequencing device (Oxford Nanopore Technologies) has become a serious competitor for routine whole-genome sequencing. Here, we established a novel, rapid and high-throughput MinION multiplex…	Friedrich Loeffler Institute	25	BMC	LONDON	BMC INFECT DIS	2020	46	3.4	10.1186/s12879-020-05367-y	8	Infectious Diseases	32883215	WOS:000568566400002
Metagenomic next-generation sequencing to identify pathogens and cancer in lung biopsy tissue	Guo, YF; Li, HN; Chen, HB; Li, ZZ; Ding, WC; Wang, J; Yin, YY; Jin, LY; Sun, SJ; Jing, CD; Wang, H	EBIOMEDICINE	English	Article	Lung biopsy tissue; Metagenomic next-generation sequencing; Pulmonary infection; Lung cancer; Genomic instability	COMMUNITY-ACQUIRED PNEUMONIA; INFECTIOUS-DISEASES SOCIETY; DIAGNOSIS; ADULTS; EVOLUTION; BLOOD	Background: Lung biopsy tissue samples can be used for infection detection and cancer diagnosis. Metagenomic next-generation sequencing (mNGS) has the potential to further improve diagnosis. Methods: From July 2018 to May 2020, lung biopsy samples of 133 patients with suspected pulmonary infection or abnormal imaging findings were collected and subjected to clinical microbiological testing, Illum…	Peking University; Peking University	36	ELSEVIER	AMSTERDAM	EBIOMEDICINE	2021	46	9.7	10.1016/j.ebiom.2021.103639	9	General & Internal Medicine; Research & Experimental Medicine	34700283	WOS:000721600700002
Rapid and Sensitive Direct Detection and Identification of Poliovirus from Stool and Environmental Surveillance Samples by Use of Nanopore Sequencing	Shaw, AG; Majumdar, M; Troman, C; O'Toole, A; Benny, B; Abraham, D; Praharaj, I; Kang, G; Sharif, S; Alam, MM; Shaukat, S; Angez, M; Khurshid, A; Mahmood, N; Arshad, Y; Rehman, L; Mujtaba, G; Akthar, R; Salman, M; Klapsa, D; Hajarha, Y; Asghar, H; Bandyopadhyay, A; Rambaut, A; Martin, J; Grassly, N	JOURNAL OF CLINICAL MICROBIOLOGY	English	Article	enterovirus; environmental surveillance; nanopore sequencing; poliovirus; stool	ENTEROVIRUS; AMPLIFICATION; SEROTYPES; CHILDREN; VACCINE; REGION	Global poliovirus surveillance involves virus isolation from stool and environmental samples, intratypic differential (ITD) by PCR, and sequencing of the VP1 region to distinguish vaccine (Sabin), vaccine-derived, and wild-type polioviruses and to ensure an appropriate response. This cell culture algorithm takes 2 to 3 weeks on average between sample receipt and sequencing. Direct detection of vi…	Imperial College London; National Institute for Biological Standards & Control; University of Edinburgh; Christian Medical College & Hospital (CMCH) Vellore; Indian Council of Medical Research (ICMR); World Health Organization; Bill & Melinda Gates Foundation	39	AMER SOC MICROBIOLOGY	WASHINGTON	J CLIN MICROBIOL	2020	46	6.1	10.1128/JCM.00920-20	13	Microbiology	32611795	WOS:000575116900018
Emergence of Hypervirulent Carbapenem-Resistant Klebsiella pneumoniae Coharboring a blaNDM-1-Carrying Virulent Plasmid and a blaKPC-2-Carrying Plasmid in an Egyptian Hospital	Ahmed, MAE; Yang, YX; Yang, YQ; Yan, B; Chen, GP; Hassan, RM; Zhong, LL; Chen, Y; Roberts, AP; Wu, YP; He, RW; Liang, XX; Qin, MY; Dai, M; Zhang, LY; Li, HY; Yang, F; Xu, LQ; Tian, GB	MSPHERE	English	Article	Klebsiella pneumoniae; NDM-1; KPC-2; hybrid plasmid; virulent plasmid; Egypt	BLA(CTX-M-65); FOSA3; RMTB	The emergence of carbapenem-resistant Klebsiella pneumoniae (CRKP) isolates in Egyptian hospitals has been reported. However, the genetic basis and analysis of the plasmids associated with carbapenem-resistant hypervirulent K. pneumoniae (CR-HvKP) in Egypt have not been presented. Therefore, we attempted to decipher the plasmid sequences that are responsible for transferring the determinants of c…	Xinxiang Medical University; Sun Yat Sen University; Ministry of Education - China; Sun Yat Sen University; Egyptian Knowledge Bank (EKB); Misr University for Science & Technology; Sun Yat Sen University; Sun Yat Sen University; Egyptian Knowledge Bank (EKB); Cairo University; Liverpool School of Tropical Medicine; Liverpool School of Tropical Medicine; Chengdu Medical College; Southern Medical U…	21	AMER SOC MICROBIOLOGY	WASHINGTON	MSPHERE	2021	46	3.7	10.1128/mSphere.00088-21	6	Microbiology	34011682	WOS:000688301100015
Targeting RNA with Next- and Third-Generation Sequencing Improves Pathogen Identification in Clinical Samples	Zhao, N; Cao, JB; Xu, JY; Liu, BB; Liu, B; Chen, DQ; Xia, BB; Chen, L; Zhang, WH; Zhang, YQ; Zhang, X; Duan, ZM; Wang, KF; Xie, F; Xiao, K; Yan, W; Xie, LX; Zhou, HW; Wang, J	ADVANCED SCIENCE	English	Article	direct RNA sequencing; metagenome; metatranscriptome; Oxford Nanopore Technology	MICROBIOME; COHORT	Fast and accurate identification of microbial pathogens is critical for the proper treatment of infections. Traditional culture-based diagnosis in clinics is increasingly supplemented by metagenomic next-generation-sequencing (mNGS). Here, RNA/cDNA-targeted sequencing (meta-transcriptomics using NGS (mtNGS)) is established to reduce the host nucleotide percentage in clinic samples and by combinin…	Chinese Academy of Sciences; Institute of Microbiology, CAS; Chinese Academy of Sciences; University of Chinese Academy of Sciences, CAS; Peking University; Chinese People's Liberation Army General Hospital; Southern Medical University - China	35	WILEY	HOBOKEN	ADV SCI	2021	45	14.3	10.1002/advs.202102593	12	Chemistry; Science & Technology - Other Topics; Materials Science	34687159	WOS:000710110200001
De Novo Assembly of Human Herpes Virus Type 1 (HHV-1) Genome, Mining of Non-Canonical Structures and Detection of Novel Drug-Resistance Mutations Using Short- and Long-Read Next Generation Sequencing Technologies	Karamitros, T; Harrison, I; Piorkowska, R; Katzourakis, A; Magiorkinis, G; Mbisa, JL	PLOS ONE	English	Article	/	SINGLE NUCLEOTIDE POLYMORPHISMS; COMPLETE DNA-SEQUENCE; SIMPLEX-VIRUS; THYMIDINE KINASE; GENITAL HERPES; VARIABILITY; ALIGNMENT; REPEAT; EVOLUTION; MUTANTS	Human herpesvirus type 1 (HHV-1) has a large double-stranded DNA genome of approximately 152 kbp that is structurally complex and GC-rich. This makes the assembly of HHV-1 whole genomes from short-read sequencing data technically challenging. To improve the assembly of HHV-1 genomes we have employed a hybrid genome assembly protocol using data from two sequencing technologies: the short-read Roch…	University of Oxford; Public Health England	58	PUBLIC LIBRARY SCIENCE	SAN FRANCISCO	PLOS ONE	2016	44	2.9	10.1371/journal.pone.0157600	19	Science & Technology - Other Topics	27309375	WOS:000378029800105
Nanopore sequencing of a monkeypox virus strain isolated from a pustular lesion in the Central African Republic	Vandenbogaert, M; Kwasiborski, A; Gonofio, E; Descorps-Declère, S; Selekon, B; Meyong, AAN; Ouilibona, RS; Gessain, A; Manuguerra, JC; Caro, V; Nakoune, E; Berthet, N	SCIENTIFIC REPORTS	English	Article	/	REAL-TIME; GENOME; ALIGNMENT; PROTEIN; CLASSIFICATION; SOFTWARE; OUTBREAK; PROGRAM; NIGERIA; MAFFT	Monkeypox is an emerging and neglected zoonotic disease whose number of reported cases has been gradually increasing in Central Africa since 1980. This disease is caused by the monkeypox virus (MPXV), which belongs to the genus Orthopoxvirus in the family Poxviridae. Obtaining molecular data is particularly useful for establishing the relationships between the viral strains involved in outbreaks …	Pasteur Network; Universite Paris Cite; Institut Pasteur Paris; Pasteur Network; Universite Paris Cite; Institut Pasteur Paris; Centre National de la Recherche Scientifique (CNRS); CNRS - National Institute for Biology (INSB); Pasteur Network; Universite Paris Cite; Institut Pasteur Paris; Pasteur Network; Chinese Academy of Sciences; Shanghai Institute of Immunity and Infection, CAS	67	NATURE PORTFOLIO	BERLIN	SCI REP-UK	2022	44	3.8	10.1038/s41598-022-15073-1	13	Science & Technology - Other Topics	35853953	WOS:000815538100059
Long-read sequencing uncovers a complex transcriptome topology in varicella zoster virus	Prazsák, I; Moldován, N; Balázs, Z; Tombácz, D; Megyeri, K; Szucs, A; Csabai, Z; Boldogkoi, Z	BMC GENOMICS	English	Article	Herpesvirus; Varicella zoster virus; Transcriptome; Oxford Nanopore Technologies; Long-read sequencing; RNA editing; nroRNA	IMMEDIATE-EARLY PROTEIN; MESSENGER-RNA; HUMAN CYTOMEGALOVIRUS; MUTATIONAL ANALYSIS; REVERSE-TRANSCRIPTASE; DNA POLYMERASE; TRANSLATION; GENE; LATENCY; POLYADENYLATION	BackgroundVaricella zoster virus (VZV) is a human pathogenic alphaherpesvirus harboring a relatively large DNA molecule. The VZV transcriptome has already been analyzed by microarray and short-read sequencing analyses. However, both approaches have substantial limitations when used for structural characterization of transcript isoforms, even if supplemented with primer extension or other techniqu…	Szeged University; Szeged University	108	BMC	LONDON	BMC GENOMICS	2018	43	3.5	10.1186/s12864-018-5267-8	20	Biotechnology & Applied Microbiology; Genetics & Heredity	30514211	WOS:000452123100004
Integrating multiple genomic technologies to investigate an outbreak of carbapenemase-producing Enterobacter hormaechei	Roberts, LW; Harris, PNA; Forde, BM; Ben Zakour, NL; Catchpoole, E; Stanton-Cook, M; Phan, MD; Sidjabat, HE; Bergh, H; Heney, C; Gawthorne, JA; Lipman, J; Allworth, A; Chan, KG; Chong, TM; Yin, WF; Schembri, MA; Paterson, DL; Beatson, SA	NATURE COMMUNICATIONS	English	Article	/	LACTAMASE GENE BLA(IMP-4); GRAM-NEGATIVE PATHOGENS; KLEBSIELLA-PNEUMONIAE; RESISTANCE GENES; TOOL; DISSEMINATION; COLONIZATION; MORTALITY; INTEGRONS; CLOACAE	Carbapenem-resistant Enterobacteriaceae (CRE) represent an urgent threat to human health. Here we report the application of several complementary whole-genome sequencing (WGS) technologies to characterise a hospital outbreak of bla(IMP-4) carbapenemase-producing E. hormaechei. Using Illumina sequencing, we determined that all outbreak strains were sequence type 90 (ST90) and near-identical. Compa…	University of Queensland; University of Queensland; University of Queensland; University of Queensland; University of Queensland; Royal Brisbane & Women's Hospital; Universiti Malaya; Jiangsu University	59	NATURE PUBLISHING GROUP	LONDON	NAT COMMUN	2020	43	14.7	10.1038/s41467-019-14139-5	11	Science & Technology - Other Topics	31980604	WOS:000543964100004
Rapid genomic characterization of SARS-CoV-2 viruses from clinical specimens using nanopore sequencing	Li, J; Wang, HQ; Mao, LF; Yu, H; Yu, XF; Sun, Z; Qian, X; Cheng, S; Chen, SC; Chen, JF; Pan, JC; Shi, JL; Wang, XC	SCIENTIFIC REPORTS	English	Article	/	/	The novel SARS-CoV-2 outbreak has swiftly spread worldwide. The rapid genome sequencing of SARS-CoV-2 strains has become a helpful tool for better understanding the genomic characteristics and origin of the virus. To obtain virus whole-genome sequences directly from clinical specimens, we performed nanopore sequencing using a modified ARTIC protocol in a portable nanopore sequencer and validated …	/	15	NATURE PORTFOLIO	BERLIN	SCI REP-UK	2020	43	3.8	10.1038/s41598-020-74656-y	10	Science & Technology - Other Topics	33060796	WOS:000582705900106
A single chromosome assembly of Bacteroides fragilis strain BE1 from Illumina and MinION nanopore sequencing data	Risse, J; Thomson, M; Patrick, S; Blakely, G; Koutsovoulos, G; Blaxter, M; Watson, M	GIGASCIENCE	English	Article	/	EXTENSIVE DNA INVERSIONS; GENOMES	Background: Second and third generation sequencing technologies have revolutionised bacterial genomics. Short-read Illumina reads result in cheap but fragmented assemblies, whereas longer reads are more expensive but result in more complete genomes. The Oxford Nanopore MinION device is a revolutionary mobile sequencer that can produce thousands of long, single molecule reads. Results: We sequence…	University of Edinburgh; Queens University Belfast; University of Edinburgh; University of Edinburgh; University of Edinburgh; UK Research & Innovation (UKRI); Biotechnology and Biological Sciences Research Council (BBSRC); Roslin Institute	29	BIOMED CENTRAL LTD	LONDON	GIGASCIENCE	2015	42	11.8	10.1186/s13742-015-0101-6	7	Life Sciences & Biomedicine - Other Topics; Science & Technology - Other Topics	26640692	WOS:000367317500001
Rapid diagnosis of bacterial meningitis by nanopore 16S amplicon sequencing: A pilot study	Moon, J; Kim, N; Kim, TJ; Jun, JS; Lee, HS; Shin, HR; Lee, ST; Jung, KH; Park, KI; Jung, KY; Kim, M; Lee, SK; Chu, K	INTERNATIONAL JOURNAL OF MEDICAL MICROBIOLOGY	English	Article	16S rRNA gene; Acute bacterial meningitis; MinION; Pathogen detection; Amplicon sequencing	REAL-TIME; CEREBROSPINAL-FLUID; IDENTIFICATION; CULTURE; PCR; MINION; ADULT	Early administration of antibiotics is crucial in the management of bacterial meningitis. Rapid pathogen identification helps to make a definite diagnosis of bacterial meningitis and enables tailored antibiotic treatment. We investigated if the 16S amplicon sequencing performed by MinION, a nanopore sequencer, was capable of rapid pathogen identification in bacterial meningitis. Six retrospective…	Seoul National University (SNU); Seoul National University Hospital; Seoul National University (SNU); Seoul National University Hospital; Ajou University; Hallym University; Seoul National University (SNU); Seoul National University Hospital	41	ELSEVIER GMBH	MUNICH	INT J MED MICROBIOL	2019	42	4.5	10.1016/j.ijmm.2019.151338	7	Microbiology; Virology	31444101	WOS:000504952700004
Metagenomic prediction of antimicrobial resistance in critically ill patients with lower respiratory tract infections	Serpa, PH; Deng, XD; Abdelghany, M; Crawford, E; Malcolm, K; Caldera, S; Fung, M; McGeever, A; Kalantar, KL; Lyden, A; Ghale, R; Deiss, T; Neff, N; Miller, SA; Doernberg, SB; Chiu, CY; DeRisi, JL; Calfee, CS; Langelier, CR	GENOME MEDICINE	English	Article	/	COMMUNITY-ACQUIRED PNEUMONIA; DISEASES-SOCIETY; GUIDELINES; MANAGEMENT	Background Antimicrobial resistance (AMR) is rising at an alarming rate and complicating the management of infectious diseases including lower respiratory tract infections (LRTI). Metagenomic next-generation sequencing (mNGS) is a recently established method for culture-independent LRTI diagnosis, but its utility for predicting AMR has remained unclear. We aimed to assess the performance of mNGS …	University of California System; University of California San Francisco; Chan Zuckerberg Initiative (CZI); University of California System; University of California San Francisco; University of California System; University of California San Francisco; University of California System; University of California San Francisco; Chan Zuckerberg Initiative (CZI); University of California System; Univer…	36	BMC	LONDON	GENOME MED	2022	41	10.4	10.1186/s13073-022-01072-4	12	Genetics & Heredity	35818068	WOS:000824903500001
Acquisition of virulence genes by a carrier strain gave rise to the ongoing epidemics of meningococcal disease in West Africa	Brynildsrud, OB; Eldholm, V; Bohlin, J; Uadiale, K; Obaro, S; Caugant, DA	PROCEEDINGS OF THE NATIONAL ACADEMY OF SCIENCES OF THE UNITED STATES OF AMERICA	English	Article	whole-genome sequencing; nanopore sequencing; horizontal gene transfer; serogroup C meningococci; virulence factors	MENINGITIDIS SEROGROUP C; NEISSERIA-MENINGITIDIS; SEQUENCE; EMERGENCE; IDENTIFICATION; BACTERIOPHAGE; PATHOGENESIS; OUTBREAK; IMPACT	In the African meningitis belt, a region of sub-Saharan Africa comprising 22 countries from Senegal in the west to Ethiopia in the east, large epidemics of serogroup A meningococcal meningitis have occurred periodically. After gradual introduction from 2010 of mass vaccination with a monovalent meningococcal A conjugate vaccine, serogroup A epidemics have been eliminated. Starting in 2013, the no…	Norwegian Institute of Public Health (NIPH); University of Nebraska System; University of Nebraska Medical Center; Norwegian Institute of Public Health (NIPH); University of Oslo	53	NATL ACAD SCIENCES	WASHINGTON	P NATL ACAD SCI USA	2018	41	9.4	10.1073/pnas.1802298115	6	Science & Technology - Other Topics	29735685	WOS:000432663000067
Polishing the Oxford Nanopore long-read assemblies of bacterial pathogens with Illumina short reads to improve genomic analyses	Chen, Z; Erickson, DL; Meng, JH	GENOMICS	English	Article	Illumina sequencing; Oxford Nanopore sequencing; Polishing; Pilon; NextPolish; Bacterial pathogen	BY-GENE APPROACH; IDENTIFICATION; MLST; DATABASE; TOOL	Oxford Nanopore sequencing has been widely used to achieve complete genomes of bacterial pathogens. However, the error rates of Oxford Nanopore long reads are high. Various polishing algorithms using Illumina short reads to correct the errors in Oxford Nanopore long-read assemblies have been developed. The impact of polishing the Oxford Nanopore long-read assemblies of bacterial pathogens with Il…	University System of Maryland; University of Maryland College Park; US Food & Drug Administration (FDA); University System of Maryland; University of Maryland College Park	57	ACADEMIC PRESS INC ELSEVIER SCIENCE	SAN DIEGO	GENOMICS	2021	38	3.4	10.1016/j.ygeno.2021.03.018	12	Biotechnology & Applied Microbiology; Genetics & Heredity	33716184	WOS:000661249200009
A complete high-quality MinION nanopore assembly of an extensively drug-resistant Mycobacterium tuberculosis Beijing lineage strain identifies novel variation in repetitive PE/PPE gene regions	Bainomugisa, A; Duarte, T; Lavu, E; Pandey, S; Coulter, C; Marais, BJ; Coin, LM	MICROBIAL GENOMICS	English	Article	Mycobacterium tuberculosis; Oxford Nanopore Technologies	GENOME; EVOLUTION; VIRULENCE; EFFLUX; TIME; SPREAD	A better understanding of the genomic changes that facilitate the emergence and spread of drug-resistant Mycobacterium tuberculosis strains is currently required. Here, we report the use of the MinION nanopore sequencer (Oxford Nanopore Technologies) to sequence and assemble an extensively drug-resistant (XDR) isolate, which is part of a modern Beijing sub-lineage strain, prevalent in Western Pro…	University of Queensland; University of Queensland; University of Sydney	64	MICROBIOLOGY SOC	LONDON	MICROB GENOMICS	2018	38	4	10.1099/mgen.0.000188	10	Genetics & Heredity; Microbiology	29906261	WOS:000440526300005
Rapid, multiplexed, whole genome and plasmid sequencing of foodborne pathogens using long-read nanopore technology	Taylor, TL; Volkening, JD; DeJesus, E; Simmons, M; Dimitrov, KM; Tillman, GE; Suarez, DL; Afonso, CL	SCIENTIFIC REPORTS	English	Article	/	DE-NOVO; OUTBREAK	U.S. public health agencies have employed next-generation sequencing (NGS) as a tool to quickly identify foodborne pathogens during outbreaks. Although established short-read NGS technologies are known to provide highly accurate data, long-read sequencing is still needed to resolve highly-repetitive genomic regions and genomic arrangement, and to close the sequences of bacterial chromosomes and p…	United States Department of Agriculture (USDA); United States Department of Agriculture (USDA)	48	NATURE PORTFOLIO	BERLIN	SCI REP-UK	2019	38	3.8	10.1038/s41598-019-52424-x	11	Science & Technology - Other Topics	31704961	WOS:000495371900026
Targeted-Sequencing Workflows for Comprehensive Drug Resistance Profiling of Mycobacterium tuberculosis Cultures Using Two Commercial Sequencing Platforms: Comparison of Analytical and Diagnostic Performance, Turnaround Time, and Cost	Tafess, K; Ng, TTL; Lao, HY; Leung, KSS; Tam, KKG; Rajwani, R; Tam, STY; Ho, LPK; Chu, CMK; Gonzalez, D; Sayada, C; Ma, OCK; Nega, BH; Ameni, G; Yam, WC; Siu, GKH	CLINICAL CHEMISTRY	English	Article	/	LINE PROBE ASSAY; ISONIAZID RESISTANCE; CROSS-RESISTANCE; MUTATIONS; SUSCEPTIBILITY; IDENTIFICATION; PYRAZINAMIDE; CAPREOMYCIN; KANAMYCIN; REGION	BACKGROUND: The emergence of Mycobacterium tuberculosis with complex drug resistance profiles necessitates a rapid and comprehensive drug susceptibility test for guidance of patient treatment. We developed two targeted-sequencing workflows based on Illumina MiSeq and Nanopore MinION for the prediction of drug resistance in M. tuberculosis toward 12 antibiotics. METHODS: A total of 163 M. tubercul…	Hong Kong Polytechnic University; University of Hong Kong; Addis Ababa University	40	OXFORD UNIV PRESS INC	CARY	CLIN CHEM	2020	37	7.1	10.1093/clinchem/hvaa092	12	Medical Laboratory Technology	32402055	WOS:000537842500012
Evaluating the potential for respiratory metagenomics to improve treatment of secondary infection and detection of nosocomial transmission on expanded COVID-19 intensive care units	Charalampous, T; Alcolea-Medina, A; Snell, LB; Williams, TGS; Batra, R; Alder, C; Telatin, A; Camporota, L; Meadows, CIS; Wyncoll, D; Barrett, NA; Hemsley, CJ; Bryan, L; Newsholme, W; Boyd, SE; Green, A; Mahadeva, U; Patel, A; Cliff, PR; Page, AJ; O'Grady, J; Edgeworth, JD	GENOME MEDICINE	English	Article	/	INVASIVE PULMONARY ASPERGILLOSIS; RESISTANCE; PATHOGENS; DATABASE; REFSEQ; PCR	Background Clinical metagenomics (CMg) has the potential to be translated from a research tool into routine service to improve antimicrobial treatment and infection control decisions. The SARS-CoV-2 pandemic provides added impetus to realise these benefits, given the increased risk of secondary infection and nosocomial transmission of multi-drug-resistant (MDR) pathogens linked with the expansion…	University of London; King's College London; Guy's & St Thomas' NHS Foundation Trust; Guy's & St Thomas' NHS Foundation Trust; UK Research & Innovation (UKRI); Biotechnology and Biological Sciences Research Council (BBSRC); Quadram Institute; Guy's & St Thomas' NHS Foundation Trust; Guy's & St Thomas' NHS Foundation Trust	59	BMC	LONDON	GENOME MED	2021	37	10.4	10.1186/s13073-021-00991-y	16	Genetics & Heredity	34784976	WOS:000719322200001
Occurrence of colistin-resistant hypervirulent Klebsiella variicola	Lu, Y; Feng, Y; McNally, A; Zong, ZY	JOURNAL OF ANTIMICROBIAL CHEMOTHERAPY	English	Article	/	PNEUMONIAE; CARBAPENEMASE; VIRULENCE	Background: A colistin-resistant mucoid Klebsiella strain was recovered from the blood of a patient in China. Hypervirulence has been reported in Klebsiella pneumoniae, but not in other Klebsiella spp. The strain was suspected to be hypervirulent and was therefore characterized. Methods: The strain was subjected to genome sequencing using both the short-read Illumina HiSeq X10 Sequencer and the l…	Sichuan University; University of Birmingham; Sichuan University; Sichuan University	21	OXFORD UNIV PRESS	OXFORD	J ANTIMICROB CHEMOTH	2018	36	3.9	10.1093/jac/dky301	4	Infectious Diseases; Microbiology; Pharmacology & Pharmacy	30060219	WOS:000452916100013
Antibiotic pressure on the acquisition and loss of antibiotic resistance genes in Klebsiella pneumoniae	Simner, PJ; Antar, AAR; Hao, S; Gurtowski, J; Tamma, PD; Rock, C; Opene, BNA; Tekle, T; Carroll, KC; Schatz, MC; Timp, W	JOURNAL OF ANTIMICROBIAL CHEMOTHERAPY	English	Article	/	BETA-LACTAMASE; EVOLUTION; ISOLATE	Objectives: In this study, we characterize a concurrent disseminated infection with a virulent hypermucoviscous (HMV) Klebsiella pneumoniae and an OXA-181-producing XDR K. pneumoniae froma patient with recent hospitalization in India. During exposure to meropenem therapy, the highly susceptible HMV K. pneumoniae became resistant to carbapenems, consistent with the acquisition of bla(OXA-181). Met…	Johns Hopkins University; Johns Hopkins University; Johns Hopkins University; Johns Hopkins University; Johns Hopkins University; Johns Hopkins University	28	OXFORD UNIV PRESS	OXFORD	J ANTIMICROB CHEMOTH	2018	36	3.9	10.1093/jac/dky121	8	Infectious Diseases; Microbiology; Pharmacology & Pharmacy	29648629	WOS:000438375800010
Enrichment by hybridisation of long DNA fragments for Nanopore sequencing	Eckert, SE; Chan, JZM; Houniet, D; Breuer, J; Speight, G	MICROBIAL GENOMICS	English	Article	enrichment by hybridisation; human Herpes virus/cytomegalovirus; influenza A; Mycobacterium tuberculosis; nanopore sequencing	REAL-TIME; TUBERCULOSIS; BACTERIAL; IDENTIFICATION; ORIGIN	Enrichment of DNA by hybridisation is an important tool which enables users to gather target-focused next-generation sequence data in an economical fashion. Current in-solution methods capture short fragments of around 200-300 nt, potentially missing key structural information such as recombination or translocations often found in viral or bacterial pathogens. The increasing use of long-read thir…	University of London; University College London	28	MICROBIOLOGY SOC	LONDON	MICROB GENOMICS	2016	36	4	10.1099/mgen.0.000087	10	Genetics & Heredity; Microbiology	28785419	WOS:000431154100006
Genomic Epidemiology Insights on NDM-Producing Pathogens Revealed the Pivotal Role of Plasmids on blaNDM Transmission	Dong, HY; Li, Y; Cheng, J; Xia, ZW; Liu, WT; Yan, TT; Chen, FF; Wang, ZQ; Li, RC; Shi, JJ; Qin, SS	MICROBIOLOGY SPECTRUM	English	Article	Enterobacterales; plasmid diversity; bla(NDM); molecular epidemiology; nanopore sequencing	ESCHERICHIA-COLI; ANTIMICROBIAL RESISTANCE; MULTIDRUG-RESISTANT; ENTEROBACTERIACEAE; EVOLUTION; STRAINS; GENES; SURVEILLANCE; ACQUISITION; SPREAD	Incidences of nosocomial infections mediated by New Delhi metallo-beta-lactamase (NDM) enzyme-producing Enterobacterales are increasing globally, resulting in a great burden to public health. The carbapenem-resistant Enterobacterales (CRE) were collected from Henan, China during 2013-2016. The bla(NDM)-positive strains were characterized using PCR, antimicrobial susceptibility testing, conjugatio…	Zhengzhou University; Ministry of Education - China; Yangzhou University; Yangzhou University	54	AMER SOC MICROBIOLOGY	WASHINGTON	MICROBIOL SPECTR	2022	36	3.7	10.1128/spectrum.02156-21	16	Microbiology	35225688	WOS:000835142100150
Nanopore Is Preferable over Illumina for 16S Amplicon Sequencing of the Gut Microbiota When Species-Level Taxonomic Classification, Accurate Estimation of Richness, or Focus on Rare Taxa Is Required	Szoboszlay, M; Schramm, L; Pinzauti, D; Scerri, J; Sandionigi, A; Biazzo, M	MICROORGANISMS	English	Article	Nanopore; Illumina; 16S rRNA; gut microbiota; species-level taxonomy	RNA GENE-SEQUENCES; DATABASE; DIVERSITY; NUMBER	Nanopore sequencing is a promising technology used for 16S rRNA gene amplicon sequencing as it can provide full-length 16S reads and has a low up-front cost that allows research groups to set up their own sequencing workflows. To assess whether Nanopore with the improved error rate of the Kit 12 chemistry should be adopted as the preferred sequencing technology instead of Illumina for 16S amplico…	University of Milano-Bicocca	62	MDPI	BASEL	MICROORGANISMS	2023	36	4.1	10.3390/microorganisms11030804	16	Microbiology	36985377	WOS:000968333600001
Rapid Genomic Characterization of SARS-CoV-2 by Direct Amplicon-Based Sequencing Through Comparison of MinION and Illumina iSeq100TMSystem	Hourdel, V; Kwasiborski, A; Balière, C; Matheus, S; Batéjat, CF; Manuguerra, JC; Vanhomwegen, J; Caro, V	FRONTIERS IN MICROBIOLOGY	English	Article	COVID-19; real-time genome sequencing; amplicon-based sequencing; iSeq100(TM)system; MinION; SARS-CoV-2	/	Global human health is increasingly challenged by emerging viral threats, especially those observed over the last 20 years with coronavirus-related human diseases, such as the Severe Acute Respiratory Syndrome (SARS) and the Middle East Respiratory Syndrome (MERS). Recently, in late December 2019, a novelBetacoronavirus, SARS-CoV-2, originating from the Chinese city of Wuhan, emerged and was then…	Pasteur Network; Universite Paris Cite; Institut Pasteur Paris	18	FRONTIERS MEDIA SA	LAUSANNE	FRONT MICROBIOL	2020	35	4	10.3389/fmicb.2020.571328	9	Microbiology	33101244	WOS:000577953400001
Identification of nsp1 gene as the target of SARS-CoV-2 real-time RT-PCR using nanopore whole-genome sequencing	Chan, WM; Ip, JD; Chu, AWH; Yip, CCY; Lo, LS; Chan, KH; Ng, ACK; Poon, RWS; To, WK; Tsang, OTY; Leung, WS; Kwan, MYW; Chua, GT; Chung, TWH; Hung, IFN; Kok, KH; Cheng, VCC; Chan, JFW; Yuen, KY; To, KKW	JOURNAL OF MEDICAL VIROLOGY	English	Article	COVID-19; diagnosis; nanopore sequencing; nsp1; RT-PCR; SARS-CoV-2	RESPIRATORY SYNDROME CORONAVIRUS; PNEUMONIA; RECOMBINATION; WUHAN	Severe acute respiratory syndrome coronavirus 2 (SARS-CoV-2) has caused the coronavirus disease 2019 (COVID-19) pandemic. Accurate detection of SARS-CoV-2 using molecular assays is critical for patient management and the control of the COVID-19 pandemic. However, there is an increasing number of SARS-CoV-2 viruses with mutations at the primer or probe binding sites, and these mutations may affect…	University of Hong Kong; University of Hong Kong; University of Hong Kong; University of Hong Kong	38	WILEY	HOBOKEN	J MED VIROL	2020	35	6.8	10.1002/jmv.26140	10	Virology	32501535	WOS:000541080600001
Field and classroom initiatives for portable sequence-based monitoring of dengue virus in Brazil	Adelino, TER; Giovanetti, M; Fonseca, V; Xavier, J; de Abreu, AS; do Nascimento, VA; Demarchi, LHF; Oliveira, MAA; da Silva, VL; de Mello, ALES; Cunha, GM; Santos, RH; de Oliveira, EC; Chamon, JA Jr; Iani, FCD; de Filippis, AMB; de Abreu, AL; de Jesus, R; de Albuquerque, CFC; Rico, JM; Said, RFD; Silva, JA; de Moura, NFO; Leite, P; Frutuoso, LCV; Haddad, SK; Martínez, A; Barreto, FK; Vazquez, CC;…	NATURE COMMUNICATIONS	English	Article	/	RIO-DE-JANEIRO; POPULATION-DYNAMICS; MODEL SELECTION; ZIKA; PHYLOGEOGRAPHY; EPIDEMIOLOGY; CIRCULATION; TYPE-1	Brazil experienced a large dengue virus (DENV) epidemic in 2019, highlighting a continuous struggle with effective control and public health preparedness. Using Oxford Nanopore sequencing, we led field and classroom initiatives for the monitoring of DENV in Brazil, generating 227 novel genome sequences of DENV1-2 from 85 municipalities (2015-2019). This equated to an over 50% increase in the numb…	Fundacao Oswaldo Cruz; Fundacao Oswaldo Cruz; Instituto Conmemorativo Gorgas de Estudios de la Salud; Universidade Federal da Bahia; Fundacao Oswaldo Cruz; Instituto Evandro Chagas; Research Institute for Health Sciences (IICS); Fundacao Oswaldo Cruz; Universidade Federal de Minas Gerais; Universidade Nova de Lisboa; Institute of Hygiene & Tropical Medicine - UNL; University of Sydney; University…	50	NATURE PORTFOLIO	BERLIN	NAT COMMUN	2021	35	14.7	10.1038/s41467-021-22607-0	12	Science & Technology - Other Topics	33863880	WOS:000641850500004
Analysis of global Aeromonas veronii genomes provides novel information on source of infection and virulence in human gastrointestinal diseases	Liu, F; Yuwono, C; Tay, ACY; Wehrhahn, MC; Riordan, SM; Zhang, L	BMC GENOMICS	English	Article	Aeromonas; Aeromonas veronii; Genome; Gastroenteritis; Inflammatory bowel disease	DRINKING-WATER; HYDROPHILA; GASTROENTERITIS	Background Aeromonas veronii is a Gram-negative rod-shaped motile bacterium that inhabits mainly freshwater environments. A. veronii is a pathogen of aquatic animals, causing diseases in fish. A. veronii is also an emerging human enteric pathogen, causing mainly gastroenteritis with various severities and also often being detected in patients with inflammatory bowel disease. Currently, limited in…	University of New South Wales Sydney; University of Western Australia; Douglass Hanly Moir Pathology; University of New South Wales Sydney; Prince of Wales Hospital (POWH)	42	BMC	LONDON	BMC GENOMICS	2022	33	3.5	10.1186/s12864-022-08402-1	15	Biotechnology & Applied Microbiology; Genetics & Heredity	35227192	WOS:000762311000002
Whole Genome Sequencing of Influenza A and B Viruses With the MinION Sequencer in the Clinical Setting: A Pilot Study	Imai, K; Tamura, K; Tanigaki, T; Takizawa, M; Nakayama, E; Taniguchi, T; Okamoto, M; Nishiyama, Y; Tarumoto, N; Mitsutake, K; Murakami, T; Maesaki, S; Maeda, T	FRONTIERS IN MICROBIOLOGY	English	Article	influenza virus; MinION; MiSeq; whole genome sequencing; Japan	REAL-TIME; PANDEMIC PREPAREDNESS; DEVELOPING-COUNTRIES; INFECTIONS; PATHOGENS; SAMPLES	Introduction: Whole genome sequencing (WGS) of influenza viruses is important for preparing vaccines and coping with newly emerging viruses. However, WGS is difficult to perform using conventional next-generation sequencers in developing countries, where facilities are often inadequate. In this study, we developed a high-throughput WGS method for influenza viruses in clinical specimens with the M…	Saitama Medical University; Saitama Medical University; Saitama Medical University; Saitama Medical University	32	FRONTIERS MEDIA SA	LAUSANNE	FRONT MICROBIOL	2018	33	4	10.3389/fmicb.2018.02748	8	Microbiology	30483243	WOS:000449972000002
MinION as part of a biomedical rapidly deployable laboratory	Walter, MC; Zwirglmaier, K; Vette, P; Holowachuk, SA; Stoecker, K; Genzel, GH; Antwerpen, MH	JOURNAL OF BIOTECHNOLOGY	English	Article	MinION; Nanopore sequencing; Outbreak investigation	FRANCISELLA-TULARENSIS; GENOME; PHYLOGEOGRAPHY; PCR	Fast turnaround times are of utmost importance for biomedical reconnaissance, particularly regarding dangerous pathogens. Recent advances in sequencing technology and its devices allow sequencing within a short time frame outside stationary laboratories close to the epicenter of the outbreak. In our study, we evaluated the portable sequencing device MinION as part of a rapidly deployable laborato…	Bundeswehr Institute of Microbiology (IMB); Defence Research & Development Canada	35	ELSEVIER SCIENCE BV	AMSTERDAM	J BIOTECHNOL	2017	33	3.2	10.1016/j.jbiotec.2016.12.006	7	Biotechnology & Applied Microbiology	27939320	WOS:000402219900004
Rapid identification of pathogens from positive blood culture bottles with the MinION nanopore sequencer	Ashikawa, S; Tarumoto, N; Imai, K; Sakai, J; Kodana, M; Kawamura, T; Ikebuchi, K; Murakami, T; Mitsutake, K; Maesaki, S; Maeda, T	JOURNAL OF MEDICAL MICROBIOLOGY	English	Article	MinION; 16S rRNA; ITS; bloodstream infection; candidemia; sequencing	DESORPTION IONIZATION-TIME; FLIGHT MASS-SPECTROMETRY; POLYMERASE-CHAIN-REACTION; STREAM INFECTIONS; ESCHERICHIA-COLI; DNA EXTRACTION; SPECIES-LEVEL; BACTERIA; FILMARRAY; CANDIDA	Purpose. Bloodstream infections are major causes of morbidity and mortality that lead to prolonged hospital stays and higher medical costs. In this study, we aimed to evaluate the MinION nanopore sequencer for the identification of the most dominant pathogens in positive blood culture bottles. Methodology. 16S and ITS1-5.8S-ITS2 rRNA genes were amplified by PCR reactions with barcoded primers usi…	Saitama Medical University; Saitama Medical University; Saitama Medical University; Saitama Medical University; Saitama Medical University; Saitama Medical University	31	MICROBIOLOGY SOC	LONDON	J MED MICROBIOL	2018	32	2.4	10.1099/jmm.0.000855	7	Microbiology	30311873	WOS:000448923800009
Highly accurate-single chromosomal complete genomes using IonTorrent and MinION sequencing of clinical pathogens	Vasudevan, K; Ragupathi, NKD; Jacob, JJ; Veeraraghavan, B	GENOMICS	English	Article	Genomics; IonTorrent; MinION; Hybrid assembly; Complete genome	OXFORD NANOPORE MINION; BACTERIAL PATHOGENS; ALGORITHM	Oxford Nanopore MinION sequencing technology has been gaining immense importance in identification of pathogen and antimicrobial resistance, though with 10-15% error rate. Short read technologies generates high accurate genome but with multiple fragments of genome. This study proposes a novel workflow to reduce the indels resulted from MinION long read sequencing by overlaying short read sequence…	Christian Medical College & Hospital (CMCH) Vellore	38	ACADEMIC PRESS INC ELSEVIER SCIENCE	SAN DIEGO	GENOMICS	2020	31	3.4	10.1016/j.ygeno.2019.04.006	7	Biotechnology & Applied Microbiology; Genetics & Heredity	30978388	WOS:000506628500059
MinION nanopore sequencing identifies the position and structure of bacterial antibiotic resistance determinants in a multidrug-resistant strain of enteroaggregative Escherichia coli	Greig, DR; Darman, TJ; Hopkins, KL; Jenkins, C	MICROBIAL GENOMICS	English	Article	nanopore sequencing; mobile genetic elements	GENE; BLA(CMY-16); PROFILES; OUTBREAK	The aim of this study was to use single-molecule, nanopore sequencing to explore the genomic environment of the resistance determinants in a multidrug-resistant (MDR) strain of enteroaggregative Escherichia coli serotype 051 : H30, sequence type (ST) 38. Sequencing was performed on the MinION Flow cell MIN-106 R9.4. Nanopore raw FAST5 reads were base-called using Albacore v1.2.1, converted to FAS…	Public Health England	20	MICROBIOLOGY SOC	LONDON	MICROB GENOMICS	2018	31	4	10.1099/mgen.0.000213	5	Genetics & Heredity; Microbiology	30235111	WOS:000448884700001
Circulation of chikungunya virus East/Central/South African lineage in Rio de Janeiro, Brazil	Xavier, J; Giovanetti, M; Fonseca, V; Thézé, J; Gräf, T; Fabri, A; de Jesus, JG; de Mendonça, MCL; Rodrigues, CDD; Mares-Guia, MA; dos Santos, CC; Tosta, SFD; Candido, D; Nogueira, RMR; de Abreu, AL; Oliveira, WK; de Albuquerque, CFC; Chieppe, A; de Oliveira, T; Brasil, P; Calvet, G; Sequeira, PC; Faria, NR; de Filippis, AMB; Alcantara, LCJ	PLOS ONE	English	Article	/	TRANSMISSION; POPULATION; MODEL; ZIKA	The emergence of chikungunya virus (CHIKV) has raised serious concerns due to the virus' rapid dissemination into new geographic areas and the clinical features associated with infection. To better understand CHIKV dynamics in Rio de Janeiro, we generated 11 near-complete genomes by means of real-time portable nanopore sequencing of virus isolates obtained directly from clinical samples. To bette…	Fundacao Oswaldo Cruz; Fundacao Oswaldo Cruz; Universidade Federal de Minas Gerais; University of Kwazulu Natal; University of Oxford; Universidade Federal do Rio de Janeiro	46	PUBLIC LIBRARY SCIENCE	SAN FRANCISCO	PLOS ONE	2019	31	2.9	10.1371/journal.pone.0217871	14	Science & Technology - Other Topics	31185030	WOS:000470970000023
Assessment of a multiplex PCR and Nanopore-based method for dengue virus sequencing in Indonesia	Stubbs, SCB; Blacklaws, BA; Yohan, B; Yudhaputri, FA; Hayati, RF; Schwem, B; Salvaña, EM; Destura, R; Lester, JS; Myint, KS; Sasmono, RT; Frost, SDW	VIROLOGY JOURNAL	English	Article	Dengue virus; Disease surveillance; Virus sequencing; Nanopore sequencing	ALIGNMENT	Background Dengue virus (DENV) infects hundreds of thousands of people annually in Indonesia. However, DENV sequence data from the country are limited, as samples from outbreaks must be shipped across long-distances to suitably equipped laboratories to be sequenced. This approach is time-consuming, expensive, and frequently results in failure due to low viral load or degradation of the RNA genome…	University of Cambridge; Eijkman Institute; University of the Philippines System; University of the Philippines Manila; Alan Turing Institute; University of London; London School of Hygiene & Tropical Medicine	26	BMC	LONDON	VIROL J	2020	31	4	10.1186/s12985-020-1294-6	13	Virology	32054488	WOS:000514686700001
Use of Unamplified RNA/cDNA-Hybrid Nanopore Sequencing for Rapid Detection and Characterization of RNA Viruses	Kilianski, A; Roth, PA; Liem, AT; Hill, JM; Willis, KL; Rossmaier, RD; Marinich, AV; Maughan, MN; Karavis, MA; Kuhn, JH; Honko, AN; Rosenzweig, CN	EMERGING INFECTIOUS DISEASES	English	Article	/	EBOLA-VIRUS; REAL-TIME; TRANSMISSION; OUTBREAK; IDENTIFICATION; SURVEILLANCE	Nanopore sequencing, a novel genomics technology, has potential applications for routine biosurveillance, clinical diagnosis, and outbreak investigation of virus infections. Using rapid sequencing of unamplified RNA/cDNA hybrids, we identified Venezuelan equine encephalitis virus and Ebola virus in 3 hours from sample receipt to data acquisition, demonstrating a fieldable technique for RNA virus …	United States Department of Defense; US Army Research, Development & Engineering Command (RDECOM); Edgewood Chemical Biological Center; United States Department of Defense; Defense Threat Reduction Agency; National Institutes of Health (NIH) - USA	15	CENTERS DISEASE CONTROL	ATLANTA	EMERG INFECT DIS	2016	30	7.2	10.3201/eid2208.160270	4	Immunology; Infectious Diseases	27191483	WOS:000384934500017
Emergence of Multidrug Resistant Hypervirulent ST23 Klebsiella pneumoniae: Multidrug Resistant Plasmid Acquisition Drives Evolution	Shankar, C; Jacob, JJ; Vasudevan, K; Biswas, R; Manesh, A; Sethuvel, DPM; Varughese, S; Biswas, I; Veeraraghavan, B	FRONTIERS IN CELLULAR AND INFECTION MICROBIOLOGY	English	Article	Klebsiella pneumoniae; hypervirulence plasmid; ST23; hybrid genome; multidrug resistance; OXA-232	SEQUENCE TYPE 23; LIVER-ABSCESS; TOOL; ANNOTATION; VIRULENCE; QUALITY	Background In recent years, the emergence of multidrug resistant hypervirulent K. pneumoniae (MDR hvKp) isolates poses severe therapeutic challenge to global public health. The present study used the complete genome sequence of two MDR hvKp isolates belonging to ST23 to characterize the phylogenetic background and plasmid diversity. Methods Two hvKp isolates from patients with bacteremia were seq…	Christian Medical College & Hospital (CMCH) Vellore; University of Minnesota System; University of Minnesota Twin Cities; Christian Medical College & Hospital (CMCH) Vellore; Christian Medical College & Hospital (CMCH) Vellore; University of Kansas; University of Kansas Medical Center	55	FRONTIERS MEDIA SA	LAUSANNE	FRONT CELL INFECT MI	2020	30	4.6	10.3389/fcimb.2020.575289	13	Immunology; Microbiology	33330125	WOS:000595409000001
Multiple Long-Read Sequencing Survey of Herpes Simplex Virus Dynamic Transcriptome	Tombácz, D; Moldován, N; Balázs, Z; Gulyás, G; Csabai, Z; Boldogköi, M; Snyder, M; Boklogköi, Z	FRONTIERS IN GENETICS	English	Article	herpesviruses; herpes simplex virus; long-read sequencing; direct RNA sequencing; Pacific Biosciences; Oxford Nanopore Technologies; transcript isoforms	PRIMER FORMATION; RNA; REVEALS; PROTEIN; LATENCY; GENOME; HSV-1; IDENTIFICATION; INFECTION; ELEMENT	Long-read sequencing (LRS) has become increasingly important in RNA research due to its strength in resolving complex transcriptomic architectures. In this regard, currently two LRS platforms have demonstrated adequate performance: the Single Molecule Real-Time Sequencing by Pacific Biosciences (PacBio) and the nanopore sequencing by Oxford Nanopore Technologies (ONT). Even though these technique…	Szeged University; Stanford University	73	FRONTIERS MEDIA SA	LAUSANNE	FRONT GENET	2019	30	2.8	10.3389/fgene.2019.00834	20	Genetics & Heredity	31608102	WOS:000487627900001
Illumina short-read and MinION long-read WGS to characterize the molecular epidemiology of an NDM-1 Serratia marcescens outbreak in Romania	Phan, HTT; Stoesser, N; Maciuca, IE; Toma, F; Szekely, E; Flonta, M; Hubbard, ATM; Pankhurst, L; Do, T; Peto, TEA; Walker, AS; Crook, DW; Timofte, D	JOURNAL OF ANTIMICROBIAL CHEMOTHERAPY	English	Article	/	CARBAPENEMASE-PRODUCING ENTEROBACTERIACEAE; INTENSIVE-CARE-UNIT; KLEBSIELLA-PNEUMONIAE; ESCHERICHIA-COLI; ANTIBIOTIC-RESISTANCE; SEQUENCE DATA; NDM-1-PRODUCING ENTEROBACTERIACEAE; BETA-LACTAMASES; PLASMIDS; STRAINS	Serratia marcescens is an emerging nosocomial pathogen, and the carbapenemase bla(NDM) has been reported in several surveys in Romania. We aimed to investigate the molecular epidemiology of S. marcescens in two Romanian hospitals over 2010-15, including a neonatal NDM-1 S. marcescens outbreak. Isolates were sequenced using Illumina technology together with carbapenem-non-susceptible NDM-1-positiv…	University of Oxford; University of Oxford; University of Liverpool; George Emil Palade University of Medicine, Pharmacy, Science, & Technology of Targu Mures; University of Liverpool	53	OXFORD UNIV PRESS	OXFORD	J ANTIMICROB CHEMOTH	2018	30	3.9	10.1093/jac/dkx456	8	Infectious Diseases; Microbiology; Pharmacology & Pharmacy	29237003	WOS:000426846000015
Coexistence of three blaKPC-2 genes on an IncF/IncR plasmid in ST11 Klebsiella pneumoniae	Feng, Y; Liu, L; McNally, A; Zong, ZY	JOURNAL OF GLOBAL ANTIMICROBIAL RESISTANCE	English	Article	Carbapenem resistance; Plasmid; KPC-2; Klebsiella pneumoniae	RESISTANCE; CLONE; IS26	Objectives: Here we report the finding of three copies of the bla(KPC-2) gene on a plasmid in ST11 Klebsiella pneumoniae. Methods: Carbapenem-resistant K. pneumoniae clinical strain WCHKP2 was subjected to whole-genome sequencing (WGS) using both a short-read Illumina HiSeq X10 platform and long-read MinION sequencer. Hybrid assembly was performed using Unicycler, and contigs were corrected using…	Sichuan University; University of Birmingham; Sichuan University; Sichuan University	14	ELSEVIER SCI LTD	OXFORD	J GLOB ANTIMICROB RE	2019	30	3.7	10.1016/j.jgar.2018.11.017	4	Infectious Diseases; Pharmacology & Pharmacy	30496820	WOS:000471951900019
Molecular Characterization of Multidrug-Resistant Yersinia enterocolitica From Foodborne Outbreaks in Sweden	Karlsson, PA; Tano, E; Jernberg, C; Hickman, RA; Guy, L; Järhult, JD; Wang, HL	FRONTIERS IN MICROBIOLOGY	English	Article	Yersinia enterocolitica; WGS; AMR; Tn2670; tetB	II SECRETION SYSTEM; BETA-LACTAMASES; COLD-STORAGE; TRANSPOSON; GENE; PATHOGENICITY; PHYLOGENY; PLASMIDS; DISEASE; TN21	The foodborne pathogen Yersinia enterocolitica causes gastrointestinal infections worldwide. In the spring of 2019, the Swedish Public Health Agency and Statens Serum Institut in Denmark independently identified an outbreak caused by Yersinia enterocolitica 4/O:3 that after sequence comparison turned out to be a cross-border outbreak. A trace-back investigation suggested shipments of fresh prewas…	Uppsala University; Uppsala University; Uppsala University Hospital; Public Health Agency of Sweden; Uppsala University; Uppsala University	77	FRONTIERS MEDIA SA	LAUSANNE	FRONT MICROBIOL	2021	29	4	10.3389/fmicb.2021.664665	11	Microbiology	34054769	WOS:000654969000001
Direct detection of drug-resistant Mycobacterium tuberculosis using targeted next generation sequencing	Murphy, SG; Smith, C; Lapierre, P; Shea, J; Patel, K; Halse, TA; Dickinson, M; Escuyer, V; Rowlinson, MC; Musser, KA	FRONTIERS IN PUBLIC HEALTH	English	Article	mycobacterium; tuberculosis; drug susceptibility; resistance; targeted sequencing; nanopore	TURNAROUND TIME; SPECIMENS; MULTICENTER; PERFORMANCE; PROFILES; ASSAY	Mycobacterium tuberculosis complex (MTBC) infections are treated with combinations of antibiotics; however, these regimens are not as efficacious against multidrug and extensively drug resistant MTBC. Phenotypic (growth-based) drug susceptibility testing on slow growing bacteria like MTBC requires many weeks to months to complete, whereas sequencing-based approaches can predict drug resistance (D…	Wadsworth Center; State University of New York (SUNY) System	56	FRONTIERS MEDIA SA	LAUSANNE	FRONT PUBLIC HEALTH	2023	29	3	10.3389/fpubh.2023.1206056	11	Public, Environmental & Occupational Health	37457262	WOS:001027966000001
Elucidating vancomycin-resistant Enterococcus faecium outbreaks: the role of clonal spread and movement of mobile genetic elements	Zhou, X; Chlebowicz, MA; Bathoorn, E; Rosema, S; Couto, N; Lokate, M; Arends, JP; Friedrich, AW; Rossen, JWA	JOURNAL OF ANTIMICROBIAL CHEMOTHERAPY	English	Article	/	SEQUENCE TYPING SCHEME; VANA; EPIDEMIOLOGY; DISSEMINATION; ARTEMIS	Background: Vancomycin-resistant Enterococcus faecium (VREfm) has emerged as a nosocomial pathogen worldwide. The dissemination of VREfm is due to both clonal spread and spread of mobile genetic elements (MGEs) such as transposons. Objectives: We aimed to combine vanB-carrying transposon data with core-genome MLST (cgMLST) typing and epidemiological data to understand the pathways of transmission…	University of Groningen	43	OXFORD UNIV PRESS	OXFORD	J ANTIMICROB CHEMOTH	2018	29	3.9	10.1093/jac/dky349	9	Infectious Diseases; Microbiology; Pharmacology & Pharmacy	30219855	WOS:000452916600006
Optimizing DNA Extraction Methods for Nanopore Sequencing of Neisseria gonorrhoeae Directly from Urine Samples	Street, TL; Barker, L; Sanderson, ND; Kavanagh, J; Hoosdally, S; Cole, K; Newnham, R; Selvaratnam, M; Andersson, M; Llewelyn, MJ; O'Grady, J; Crook, DW; Eyre, DW	JOURNAL OF CLINICAL MICROBIOLOGY	English	Article	DNA extraction; Nanopore sequencing; Neisseria gonorrhoeae; whole-genome sequencing	ANTIMICROBIAL RESISTANCE	Empirical gonorrhea treatment at initial diagnosis reduces onward transmission. However, increasing resistance to multiple antibiotics may necessitate waiting for culture-based diagnostics to select an effective treatment. There is a need for same-day culture-free diagnostics that identify infection and detect antimicrobial resistance. We investigated if Nanopore sequencing can detect sufficient …	University of Oxford; University of Brighton; University of Oxford; Oxford University Hospitals NHS Foundation Trust; UK Research & Innovation (UKRI); Biotechnology and Biological Sciences Research Council (BBSRC); Quadram Institute; University of Oxford; University of Oxford	26	AMER SOC MICROBIOLOGY	WASHINGTON	J CLIN MICROBIOL	2020	29	6.1	10.1128/JCM.01822-19	13	Microbiology	31852766	WOS:000524134200023
Oxford nanopore long-read sequencing enables the generation of complete bacterial and plasmid genomes without short-read sequencing	Zhao, WX; Zeng, W; Pang, B; Luo, M; Peng, Y; Xu, JL; Kan, B; Li, ZP; Lu, X	FRONTIERS IN MICROBIOLOGY	English	Article	ONT sequencing; accuracy; complete genome; bacteria; plasmid	ANTIBIOTIC-RESISTANCE	IntroductionGenome-based analysis is crucial in monitoring antibiotic-resistant bacteria (ARB)and antibiotic-resistance genes (ARGs). Short-read sequencing is typically used to obtain incomplete draft genomes, while long-read sequencing can obtain genomes of multidrug resistance (MDR) plasmids and track the transmission of plasmid-borne antimicrobial resistance genes in bacteria. However, long-re…	Chinese Center for Disease Control & Prevention; National Institute for Communicable Disease Control & Prevention, Chinese Center for Disease Control & Prevention; Shanxi Medical University; Shandong University; Beijing Technology & Business University	35	FRONTIERS MEDIA SA	LAUSANNE	FRONT MICROBIOL	2023	28	4	10.3389/fmicb.2023.1179966	9	Microbiology	37256057	WOS:000996009400001
Investigation of intra-hospital SARS-CoV-2 transmission using nanopore whole-genome sequencing	Lovestad, AH; Jorgensen, SB; Handal, N; Ambur, OH; Aamot, HV	JOURNAL OF HOSPITAL INFECTION	English	Article	SARS-CoV-2; COVID-19; Transmission; Healthcare workers; Hospital; Whole-genome sequencing	COVID-19	Background: During the SARS-CoV-2 pandemic, healthcare workers (HCWs) are being exposed to infection both at work and in their communities. Determining where HCWs might have been infected is challenging based on epidemiological data alone. At Akershus University Hospital, Norway, several clusters of possible intra-hospital SARS-CoV-2 transmission were identified based on routine contact tracing. …	Oslo Metropolitan University (OsloMet); University of Oslo; University of Oslo; University of Oslo	34	W B SAUNDERS CO LTD	LONDON	J HOSP INFECT	2021	28	3.9	10.1016/j.jhin.2021.02.022	10	Public, Environmental & Occupational Health; Infectious Diseases	33647375	WOS:000644969600016
Antimicrobial Resistance and Genomic Characterization of OXA-48-and CTX-M-15-Co-Producing Hypervirulent Klebsiella pneumoniae ST23 Recovered from Nosocomial Outbreak	Shaidullina, E; Shelenkov, A; Yanushevich, Y; Mikhaylova, Y; Shagin, D; Alexandrova, I; Ershova, O; Akimkin, V; Kozlov, R; Edelstein, M	ANTIBIOTICS-BASEL	English	Article	Klebsiella pneumoniae; OXA-48; hypervirulent ST23; multidrug resistance; whole-genome sequencing	LIVER-ABSCESS	Multidrug resistance (MDR) and hypervirulence (hv) have been long considered distinct evolutionary traits for Klebsiella pneumoniae (Kp), a versatile human pathogen. The recent emergence of Kp strains combining these traits poses a serious global threat. In this article, we describe the phenotypic and genomic characteristics of an MDR hvKp isolate, MAR14-456, representative of a nosocomial outbre…	Kazan Federal University; Pirogov Russian National Research Medical University	34	MDPI	BASEL	ANTIBIOTICS-BASEL	2020	27	4.3	10.3390/antibiotics9120862	9	Infectious Diseases; Pharmacology & Pharmacy	33287207	WOS:000602211400001
Microbial dynamics with CRC progression: a study of the mucosal microbiota at multiple sites in cancers, adenomatous polyps, and healthy controls	Senthakumaran, T; Moen, AEF; Tannaes, TM; Endres, A; Brackmann, SA; Rounge, TB; Bemanian, V; Tunsjo, HS	EUROPEAN JOURNAL OF CLINICAL MICROBIOLOGY & INFECTIOUS DISEASES	English	Article	Colorectal cancer; Tumor biopsies; 16S rRNA amplicon sequencing; Fusobacterium species and subspecies; Biofilm bacteria	FUSOBACTERIUM-NUCLEATUM; COLORECTAL-CANCER; GUT MICROBIOTA; COLON; ENDOCARDITIS; EXPRESSION; CARCINOMA; GENE	Accumulating evidence has related the gut microbiota to colorectal cancer (CRC). Fusobacterium nucleatum has repeatedly been linked to colorectal tumorigenesis. The aim of this study was to investigate microbial composition in different sampling sites, in order to profile the microbial dynamics with CRC progression. Further, we characterized the tumor-associated F. nucleatum subspecies. Here, we …	Oslo Metropolitan University (OsloMet); University of Oslo; University of Oslo; Norwegian Institute of Public Health (NIPH); University of Oslo; University of Oslo; University of Oslo; University of Oslo; University of Oslo	64	SPRINGER	NEW YORK	EUR J CLIN MICROBIOL	2023	27	3.7	10.1007/s10096-023-04551-7	18	Infectious Diseases; Microbiology	36703031	WOS:000920809100001
Rapid Detection of Bacterial Pathogens and Antimicrobial Resistance Genes in Clinical Urine Samples With Urinary Tract Infection by Metagenomic Nanopore Sequencing	Zhang, L; Huang, WH; Zhang, SW; Li, Q; Wang, Y; Chen, T; Jiang, H; Kong, DC; Lv, QY; Zheng, YL; Ren, YH; Liu, P; Jiang, YQ; Chen, Y	FRONTIERS IN MICROBIOLOGY	English	Article	urinary tract infections (UTIs); metagenomics; Illumina sequencing; nanopore sequencing; diagnosis; antimicrobial resistance	ANTIBIOTIC-RESISTANCE; IDENTIFICATION	Urinary tract infections (UTIs) are among the most common acquired bacterial infections in humans. The current gold standard method for identification of uropathogens in clinical laboratories is cultivation. However, culture-based assays have substantial drawbacks, including long turnaround time and limited culturability of many potential pathogens. Nanopore sequencing technology can overcome the…	Yantai University; Beijing Institute of Microbiology & Epidemiology; Academy of Military Medical Sciences - China; Beijing University of Chinese Medicine	55	FRONTIERS MEDIA SA	LAUSANNE	FRONT MICROBIOL	2022	27	4	10.3389/fmicb.2022.858777	13	Microbiology	35655992	WOS:000805105500001
Performance of Metagenomic Next-Generation Sequencing for the Diagnosis of Viral Meningoencephalitis in a Resource-Limited Setting	Hong, NTT; Anh, NT; Mai, NTH; Nghia, HDT; Nhu, LNT; Thanh, TT; Phu, NH; Deng, XT; van Doorn, HR; Chau, NVV; Delwart, E; Thwaites, G; Van Tan, L	OPEN FORUM INFECTIOUS DISEASES	English	Article	metagenomics; next-generation sequencing; nanopore; MinION; meningoencephalitis	VIRUS-INFECTION; ENCEPHALITIS; ETIOLOGIES	Background. Meningoencephalitis is a devastating disease worldwide. Current diagnosis fails to establish the cause in >= 50% of patients. Metagenomic next-generation sequencing (mNGS) has emerged as pan-pathogen assays for infectious diseases diagnosis, but few studies have been conducted in resource-limited settings. Methods. We assessed the performance of mNGS in the cerebrospinal fluid (CSF) o…	University of Oxford; Vietnam National University Ho Chi Minh City (VNUHCM) System; Vitalant; Vitalant Research Institute; University of California System; University of California San Francisco; University of Oxford	33	OXFORD UNIV PRESS INC	CARY	OPEN FORUM INFECT DI	2020	27	3.8	10.1093/ofid/ofaa046	10	Immunology; Infectious Diseases; Microbiology	32158774	WOS:000522853100004
Early MinION™ nanopore single-molecule sequencing technology enables the characterization of hepatitis B virus genetic complexity in clinical samples	Sauvagel, V; Boizeau, L; Candotti, D; Vandenbogaert, M; Servant-Delmas, A; Carol, V; Laperche, S	PLOS ONE	English	Article	/	BLOOD-DONORS; REAL-TIME; BACTERIAL; GENOMES; IDENTIFICATION; GENOTYPES; VARIANTS	Until recently, the method of choice to characterize viral diversity consisted in cloning PCR amplicons of full-length viral genomes and Sanger-sequencing of multiple clones. However, this is extremely laborious, time-consuming, and low-throughput. Next generation short read sequencing appears also limited by its inability to directly sequence full-length viral genomes. The MinIONTM device recent…	Pasteur Network; Universite Paris Cite; Institut Pasteur Paris	37	PUBLIC LIBRARY SCIENCE	SAN FRANCISCO	PLOS ONE	2018	27	2.9	10.1371/journal.pone.0194366	15	Science & Technology - Other Topics	29566006	WOS:000428093900057
Comparison of the performance of an amplicon sequencing assay based on Oxford Nanopore technology to real-time PCR assays for detecting bacterial biodefense pathogens	Player, R; Verratti, K; Staab, A; Bradburne, C; Grady, S; Goodwin, B; Sozhamannan, S	BMC GENOMICS	English	Article	Biodefense; Biodetection; Biosurveillance; Oxford Nanopore sequencing; Real-time PCR; High throughput PCR assay; LoD; Singleplex; Multiplex	/	BackgroundThe state-of-the-art in nucleic acid based biodetection continues to be polymerase chain reaction (PCR), and many real-time PCR assays targeting biodefense pathogens for biosurveillance are in widespread use. These assays are predominantly singleplex; i.e. one assay tests for the presence of one target, found in a single organism, one sample at a time. Due to the intrinsic limitations o…	Johns Hopkins University; Johns Hopkins University Applied Physics Laboratory	13	BMC	LONDON	BMC GENOMICS	2020	26	3.5	10.1186/s12864-020-6557-5	21	Biotechnology & Applied Microbiology; Genetics & Heredity	32066372	WOS:000517202600003
Nanopore metagenomic sequencing of influenza virus directly from respiratory samples: diagnosis, drug resistance and nosocomial transmission, United Kingdom, 2018/19 influenza season	Xu, YF; Lewandowski, K; Downs, LO; Kavanagh, J; Supsup, TH; Lumley, S; Jeffery, K; Foster, D; Sanderson, ND; Vaughan, A; Morgan, M; Supsup, RV; Supsup, MC; Peto, T; Crook, D; Walker, AS; Matthews, PC; Pullan, ST	EUROSURVEILLANCE	English	Article	/	NEURAMINIDASE INHIBITORS; GLOBAL UPDATE; SUSCEPTIBILITY; ORIGIN	Background: Influenza virus presents a considerable challenge to public health by causing seasonal epidemics and occasional pandemics. Nanopore metagenomic sequencing has the potential to be deployed for near-patient testing, providing rapid infection diagnosis, rationalising antimicrobial therapy, and supporting infection-control interventions. Aim: To evaluate the applicability of this sequenci…	University of Oxford; University of Oxford; Public Health England; University of Oxford; Oxford University Hospitals NHS Foundation Trust	38	EUR CENTRE DIS PREVENTION & CONTROL	STOCKHOLM	EUROSURVEILLANCE	2021	26	10	10.2807/1560-7917.ES.2021.26.27.2000004	12	Infectious Diseases	34240696	WOS:000672156300001
poreCov-An Easy to Use, Fast, and Robust Workflow for SARS-CoV-2 Genome Reconstruction via Nanopore Sequencing	Brandt, C; Krautwurst, S; Spott, R; Lohde, M; Jundzill, M; Marquet, M; Hölzer, M	FRONTIERS IN GENETICS	English	Article	Nextflow; bioinformatics; coronavirus; COVID-19; lineages; docker; SARS-CoV-2; pipeline; nanopore sequencing	/	In response to the SARS-CoV-2 pandemic, a highly increased sequencing effort has been established worldwide to track and trace ongoing viral evolution. Technologies, such as nanopore sequencing via the ARTIC protocol are used to reliably generate genomes from raw sequencing data as a crucial base for molecular surveillance. However, for many labs that perform SARS-CoV-2 sequencing, bioinformatics…	Friedrich Schiller University of Jena; Friedrich Schiller University of Jena; Robert Koch Institute	26	FRONTIERS MEDIA SA	LAUSANNE	FRONT GENET	2021	26	2.8	10.3389/fgene.2021.711437	8	Genetics & Heredity	34394197	WOS:000683850200001
Evaluating the genome and resistome of extensively drug-resistant Klebsiella pneumoniae using native DNA and RNA Nanopore sequencing	Pitt, ME; Nguyen, SH; Duarte, TPS; Teng, HT; Blaskovich, MAT; Cooper, MA; Coin, LJM	GIGASCIENCE	English	Article	/	REAL-TIME; COLISTIN RESISTANCE; PLASMIDS; GENE; PATHOGENS; IDENTIFICATION; ALIGNMENT	Background: Klebsiella pneumoniae frequently harbours multidrug resistance, and current diagnostics struggle to rapidly identify appropriate antibiotics to treat these bacterial infections. The MinION device can sequence native DNA and RNA in real time, providing an opportunity to compare the utility of DNA and RNA for prediction of antibiotic susceptibility. However, the effectiveness of bacteri…	University of Queensland; University of Melbourne; Peter Doherty Institute	65	OXFORD UNIV PRESS	OXFORD	GIGASCIENCE	2020	26	11.8	10.1093/gigascience/giaa002	14	Life Sciences & Biomedicine - Other Topics; Science & Technology - Other Topics	32016399	WOS:000524695900001
Closing the gap: Oxford Nanopore Technologies R10 sequencing allows comparable results to Illumina sequencing for SNP-based outbreak investigation of bacterial pathogens	Bogaerts, B; Van den Bossche, A; Verhaegen, B; Delbrassinne, L; Mattheus, W; Nouws, S; Godfroid, M; Hoffman, S; Roosens, NHC; De Keersmaecker, SCJ; Vanneste, K	JOURNAL OF CLINICAL MICROBIOLOGY	English	Article	outbreak; nanopore sequencing; illumina; public health; whole-genome sequencing	READ ALIGNMENT	Whole-genome sequencing has become the method of choice for bacterial outbreak investigation, with most clinical and public health laboratories currently routinely using short-read Illumina sequencing. Recently, long-read Oxford Nanopore Technologies (ONT) sequencing has gained prominence and may offer advantages over short-read sequencing, particularly with the recent introduction of the R10 che…	Sciensano; Sciensano; Sciensano	51	AMER SOC MICROBIOLOGY	WASHINGTON	J CLIN MICROBIOL	2024	26	6.1	10.1128/jcm.01576-23	21	Microbiology	38441926	WOS:001180019100001
Rapid virulence prediction and identification of Newcastle disease virus genotypes using third-generation sequencing	Butt, SL; Taylor, TL; Volkening, JD; Dimitrov, KM; Williams-Coplin, D; Lahmers, KK; Miller, PJ; Rana, AM; Suarez, DL; Afonso, CL; Stanton, JB	VIROLOGY JOURNAL	English	Article	Newcastle disease virus; RNA; Genotype; Nanopore sequencing; Rapid sequencing; MinION; NGS	REVERSE-TRANSCRIPTION PCR; REAL-TIME; NUCLEOTIDE-SEQUENCE; CLASS-I; ALIGNMENT; BACTERIAL; MINION; CLASSIFICATION; POSITION; RNA	BackgroundNewcastle disease (ND) outbreaks are global challenges to the poultry industry. Effective management requires rapid identification and virulence prediction of the circulating Newcastle disease viruses (NDV), the causative agent of ND. However, these diagnostics are hindered by the genetic diversity and rapid evolution of NDVs.MethodsAn amplicon sequencing (AmpSeq) workflow for virulence…	United States Department of Agriculture (USDA); University System of Georgia; University of Georgia; Virginia Polytechnic Institute & State University	56	BMC	LONDON	VIROL J	2018	26	4	10.1186/s12985-018-1077-5	14	Virology	30466441	WOS:000451045100002
Comparison of SARS-CoV-2 sequencing using the ONT GridION and the Illumina MiSeq	Tshiabuila, D; Giandhari, J; Pillay, S; Ramphal, U; Ramphal, Y; Maharaj, A; Anyaneji, UJ; Naidoo, Y; Tegally, H; San, EJ; Wilkinson, E; Lessells, RJ; de Oliveira, T	BMC GENOMICS	English	Article	SARS-CoV-2; Illumina MiSeq; Oxford Nanopore technology GridION; Nanopore sequencing; next generation sequencing; bioinformatics	GENOME; ALGORITHM	Background Over 4 million SARS-CoV-2 genomes have been sequenced globally in the past 2 years. This has been crucial in elucidating transmission chains within communities, the development of new diagnostic methods, vaccines, and antivirals. Although several sequencing technologies have been employed, Illumina and Oxford Nanopore remain the two most commonly used platforms. The sequence quality be…	University of Kwazulu Natal; Stellenbosch University; University of Washington; University of Washington Seattle	49	BMC	LONDON	BMC GENOMICS	2022	25	3.5	10.1186/s12864-022-08541-5	17	Biotechnology & Applied Microbiology; Genetics & Heredity	35459088	WOS:000785637200003
Hybrid Genome Assembly and Annotation of a Pandrug-Resistant Klebsiella pneumoniae Strain Using Nanopore and Illumina Sequencing	Ruan, Z; Wu, JY; Chen, HF; Draz, MS; Xu, J; He, F	INFECTION AND DRUG RESISTANCE	English	Article	Klebsiella pneumoniae; whole-genome sequencing; nanopore; hybrid assembly; pandrug resistance	ANTIMICROBIAL RESISTANCE; DATABASE; SEARCH; TOOL	Background: The prevalence of multidrug-resistant Klebsiella pneumoniae is increasingly being implicated worldwide in a variety of infections with high mortalities. Here, we report the complete genome sequence of K. pneumoniae strain KP58, a pandrug-resistant K. pneumoniae strain that exhibits high levels of resistance to colistin and tigecycline in China. Methods: The K. pneumoniae strain KP58 w…	Zhejiang University; Zhejiang University; Harvard University; Harvard Medical School; Harvard University; Zhejiang Academy of Medical Sciences; Hangzhou Medical College; Zhejiang Provincial People's Hospital	35	DOVE MEDICAL PRESS LTD	ALBANY	INFECT DRUG RESIST	2020	25	2.9	10.2147/IDR.S240404	8	Infectious Diseases; Pharmacology & Pharmacy	32021334	WOS:000510857400001
Acquired fluoroquinolone resistance genes in corneal isolates of Pseudomonas aeruginosa	Khan, M; Summers, S; Rice, SA; Stapleton, F; Willcox, MDP; Subedi, D	INFECTION GENETICS AND EVOLUTION	English	Article	Antimicrobial resistance; Fluoroquinolones; Pseudomonas aeruginosa; Eye; Corneal ulcer; Microbial keratitis	QUINOLONE RESISTANCE; ANTIMICROBIAL RESISTANCE; ANTIBIOTIC-RESISTANCE; MICROBIAL KERATITIS; MECHANISMS; VIRULENCE; SEQUENCE; GENOME; EMERGENCE; IDENTIFICATION	Fluoroquinolones are widely used as an empirical therapy for pseudomonal ocular infections. Based on increasing reports on acquired fluoroquinolone resistance genes in clinical isolates of Pseudomonas aeruginosa, we investigated 33 strains of P. aeruginosa isolated from the cornea of microbial keratitis patients in India and Australia between 1992 and 2018 to understand the prevalence of acquired…	University of New South Wales Sydney; Nanyang Technological University; University of Technology Sydney; Monash University	77	ELSEVIER	AMSTERDAM	INFECT GENET EVOL	2020	25	2.6	10.1016/j.meegid.2020.104574	10	Infectious Diseases	32992031	WOS:000593919700011
Real-Time Nanopore Q20+Sequencing Enables Extremely Fast and Accurate Core Genome MLST Typing and Democratizes Access to High-Resolution Bacterial Pathogen Surveillance	Wagner, GE; Dabernig-Heinz, J; Lipp, M; Cabal, A; Simantzik, J; Kohl, M; Scheiber, M; Lichtenegger, S; Ehricht, R; Leitner, E; Ruppitsch, W; Steinmetz, I	JOURNAL OF CLINICAL MICROBIOLOGY	English	Article	Bordetella pertussis; bacterial typing; molecular surveillance; next-generation sequencing	BORDETELLA-PERTUSSIS; EPIDEMIOLOGY; DYNAMICS	Next-generation whole-genome sequencing is essential for high-resolution surveillance of bacterial pathogens, for example, during outbreak investigations or for source tracking and escape variant analysis. However, current global sequencing and bioinformatic bottlenecks and a long time to result with standard technologies demand new approaches. In this study, we investigated whether novel nanopor…	Medical University of Graz; Friedrich Schiller University of Jena	63	AMER SOC MICROBIOLOGY	WASHINGTON	J CLIN MICROBIOL	2023	25	6.1	10.1128/jcm.01631-22	16	Microbiology	36988494	WOS:000958957500001
Genomic analyses of multidrug-resistant Salmonella Indiana, Typhimurium, and Enteritidis isolates using MinION and MiSeq sequencing technologies	Chen, Z; Kuang, D; Xu, XB; González-Escalona, N; Erickson, DL; Brown, E; Meng, JH	PLOS ONE	English	Article	/	ANTIBIOTIC-RESISTANCE; QUINOLONE RESISTANCE; READ ALIGNMENT; DE-NOVO; PREVALENCE; ENTERICA	We sequenced 25 isolates of phenotypically multidrug-resistantSalmonellaIndiana (n = 11), Typhimurium (n = 8), and Enteritidis (n = 6) using both MinION long-read [SQK-LSK109 and flow cell (R9.4.1)] and MiSeq short-read (Nextera XT and MiSeq Reagent Kit v2) sequencing technologies to determine the advantages of each approach in terms of the characteristics of genome structure, antimicrobial resis…	US Food & Drug Administration (FDA); University System of Maryland; University of Maryland College Park; Shanghai Jiao Tong University; Shanghai Center for Disease Control & Prevention; US Food & Drug Administration (FDA)	57	PUBLIC LIBRARY SCIENCE	SAN FRANCISCO	PLOS ONE	2020	25	2.9	10.1371/journal.pone.0235641	25	Science & Technology - Other Topics	32614888	WOS:000549913100027
A rapid bacterial pathogen and antimicrobial resistance diagnosis workflow using Oxford nanopore adaptive sequencing method	Cheng, H; Sun, YH; Yang, Q; Deng, MG; Yu, ZJ; Zhu, G; Qu, JX; Liu, L; Yang, L; Xia, Y	BRIEFINGS IN BIOINFORMATICS	English	Article	human host depletion; metagenomics pipeline; pathogen diagnosis; antibiotic resistance genes; nanopore adaptive sampling	IDENTIFICATION; GENES; DNA	Metagenomic sequencing analysis (mNGS) has been implemented as an alternative approach for pathogen diagnosis in recent years, which is independent of cultivation and is able to identify all potential antibiotic resistance genes (ARGs). However, current mNGS methods have to deal with low amounts of prokaryotic deoxyribonucleic acid (DNA) and high amounts of host DNA in clinical samples, which sig…	Southern University of Science & Technology; Huazhong University of Science & Technology; Southern University of Science & Technology	38	OXFORD UNIV PRESS	OXFORD	BRIEF BIOINFORM	2022	24	6.8	10.1093/bib/bbac453	10	Biochemistry & Molecular Biology; Mathematical & Computational Biology	36259361	WOS:000869726100001
Prospective Evaluation of a Rapid Clinical Metagenomics Test for Bacterial Pneumonia	Mu, SR; Hu, L; Zhang, Y; Liu, YM; Cui, XJ; Zou, XH; Wang, YM; Lu, BH; Zhou, SL; Liang, XX; Liang, C; Xiao, N; O'Grady, J; Lee, S; Cao, B	FRONTIERS IN CELLULAR AND INFECTION MICROBIOLOGY	English	Article	nanopore sequencing; lower respiratory infections; rapid diagnostics; bacterial pneumonia; pathogenic diagnosis	RESPIRATORY-TRACT INFECTIONS; DE-ESCALATION; IDENTIFICATION; DIAGNOSIS; MANAGEMENT; PATHOGENS; ETIOLOGY; VIRUSES; SEPSIS	Background The diagnosis of bacterial pathogens in lower respiratory tract infections (LRI) using conventional culture methods remains challenging and time-consuming. Objectives To evaluate the clinical performance of a rapid nanopore-sequencing based metagenomics test for diagnosis of bacterial pathogens in common LRIs through a large-scale prospective study. Methods We enrolled 292 hospitalized…	Capital Medical University; China-Japan Friendship Hospital; Chinese Academy of Medical Sciences - Peking Union Medical College; Peking Union Medical College; China-Japan Friendship Hospital; Tsinghua University; University of East Anglia; UK Research & Innovation (UKRI); Biotechnology and Biological Sciences Research Council (BBSRC); Quadram Institute	42	FRONTIERS MEDIA SA	LAUSANNE	FRONT CELL INFECT MI	2021	24	4.6	10.3389/fcimb.2021.684965	13	Immunology; Microbiology	34737971	WOS:000715767400001
High contiguity genome sequence of a multidrug-resistant hospital isolate of Enterobacter hormaechei	Monahan, LG; DeMaere, MZ; Cummins, ML; Djordjevic, SP; Chowdhury, PR; Darling, AE	GUT PATHOGENS	English	Article	Enterobacter hormaechei; Enterobacter cloacae complex; Long-read sequencing; Hybrid assembly	CLOACAE COMPLEX; TOOL	Enterobacter hormaechei is an important emerging pathogen and a key member of the highly diverse Enterobacter cloacae complex. E. hormaechei strains can persist and spread in nosocomial environments, and often exhibit resistance to multiple clinically important antibiotics. However, the genomic regions that harbour resistance determinants are typically highly repetitive and impossible to resolve …	University of Technology Sydney; Department of Primary Industries & Regional Development NSW	25	BMC	LONDON	GUT PATHOG	2019	24	4.4	10.1186/s13099-019-0288-7	6	Gastroenterology & Hepatology; Microbiology	30805030	WOS:000458921500001
Nanopore Sequencing Reveals Novel Targets for Detection and Surveillance of Human and Avian Influenza A Viruses	Yip, CCY; Chan, WM; Ip, JD; Seng, CWM; Leung, KH; Poon, RWS; Ng, ACK; Wu, WL; Zhao, HJ; Chan, KH; Siu, GKH; Ng, TTL; Cheng, VCC; Kok, KH; Yuen, KY; To, KKW	JOURNAL OF CLINICAL MICROBIOLOGY	English	Article	influenza; next-generation sequencing; diagnostic assay	MATRIX GENES; H7N9 VIRUS; SENSITIVITY; MUTATIONS; EMERGENCE; RNA	Accurate detection of influenza A virus (IAV) is crucial for patient management, infection control, and epidemiological surveillance. The World Health Organization and the Centers for Disease Control and Prevention have recommended using the M gene as the diagnostic gene target for reverse-transcription-PCR (RT-PCR). However, M gene RT-PCR has reduced sensitivity for recent IAV due to novel gene …	University of Hong Kong; University of Hong Kong; Hong Kong Polytechnic University; University of Hong Kong; University of Hong Kong; University of Hong Kong	31	AMER SOC MICROBIOLOGY	WASHINGTON	J CLIN MICROBIOL	2020	24	6.1	10.1128/JCM.02127-19	10	Microbiology	32132187	WOS:000535797600032
Hybrid Assembly Provides Improved Resolution of Plasmids, Antimicrobial Resistance Genes, and Virulence Factors in Escherichia coli and Klebsiella pneumoniae Clinical Isolates	Khezri, A; Avershina, E; Ahmad, R	MICROORGANISMS	English	Article	Oxford Nanopore; Illumina; short-read; long-read; hybrid assembly; antimicrobial resistance; virulence factors; clinical isolates; blood culture; plasmids	GENOME; NANOPORE; ANNOTATION; PACBIO	Emerging new sequencing technologies have provided researchers with a unique opportunity to study factors related to microbial pathogenicity, such as antimicrobial resistance (AMR) genes and virulence factors. However, the use of whole-genome sequence (WGS) data requires good knowledge of the bioinformatics involved, as well as the necessary techniques. In this study, a total of nine Escherichia …	Inland Norway University of Applied Sciences; UiT The Arctic University of Tromso	63	MDPI	BASEL	MICROORGANISMS	2021	24	4.1	10.3390/microorganisms9122560	18	Microbiology	34946161	WOS:000735518200001
Comparison of 6 DNA extraction methods for isolation of high yield of high molecular weight DNA suitable for shotgun metagenomics Nanopore sequencing to detect bacteria	Gand, M; Bloemen, B; Vanneste, K; Roosens, NHC; De Keersmaecker, SCJ	BMC GENOMICS	English	Article	DNA extraction; Method evaluation; HMW DNA; Nanopore; Metagenomics; Long-read	OPPORTUNITIES; SURVEILLANCE	BackgroundOxford Nanopore Technologies (ONT) offers an accessible platform for long-read sequencing, which improves the reconstruction of genomes and helps to resolve complex genomic contexts, especially in the case of metagenome analysis. To take the best advantage of long-read sequencing, DNA extraction methods must be able to isolate pure high molecular weight (HMW) DNA from complex metagenomi…	Sciensano	43	BMC	LONDON	BMC GENOMICS	2023	23	3.5	10.1186/s12864-023-09537-5	14	Biotechnology & Applied Microbiology; Genetics & Heredity	37537550	WOS:001042123700001
Adaptation of Oxford Nanopore technology for hepatitis C whole genome sequencing and identification of within-host viral variants	Riaz, N; Leung, P; Barton, K; Smith, MA; Carswell, S; Bull, R; Lloyd, AR; Rodrigo, C	BMC GENOMICS	English	Article	Hepatitis C virus; Third generation sequencing; Nano-Q; Haplotypes; Oxford Nanopore technology	VIRUS GENOMES; FULL-LENGTH; PYTHON; INFECTION; REVEALS; PEOPLE	Background: Hepatitis C (HCV) and many other RNA viruses exist as rapidly mutating quasi-species populations in a single infected host. High throughput characterization of full genome, within-host variants is still not possible despite advances in next generation sequencing. This limitation constrains viral genomic studies that depend on accurate identification of hemi-genome or whole genome, wit…	University of New South Wales Sydney; Kirby Institute; University of New South Wales Sydney; Garvan Institute of Medical Research	31	BMC	LONDON	BMC GENOMICS	2021	23	3.5	10.1186/s12864-021-07460-1	12	Biotechnology & Applied Microbiology; Genetics & Heredity	33653280	WOS:000626156100003
Characterization of Severe Acute Respiratory Syndrome Coronavirus 2 (SARS-CoV-2) Infection Clusters Based on Integrated Genomic Surveillance, Outbreak Analysis and Contact Tracing in an Urban Setting	Walker, A; Houwaart, T; Finzer, P; Ehlkes, L; Tyshaieva, A; Damagnez, M; Strelow, D; Duplessis, A; Nicolai, J; Wienemann, T; Tamayo, T; Vasconcelos, MK; Hülse, L; Hoffmann, K; Lübke, N; Hauka, S; Andree, M; Däumer, MP; Thielen, A; Kolbe-Busch, S; Göbels, K; Zotz, R; Pfeffer, K; Timm, J; Dilthey, AT	CLINICAL INFECTIOUS DISEASES	English	Article	genomic epidemiology; infection chain; community transmission; rapid sequencing; Nanopore sequencing	REAL-TIME; VIRUS; ZIKA	Background Tracing of severe acute respiratory syndrome coronavirus 2 (SARS-CoV-2) transmission chains is still a major challenge for public health authorities, when incidental contacts are not recalled or are not perceived as potential risk contacts. Viral sequencing can address key questions about SARS-CoV-2 evolution and may support reconstruction of viral transmission networks by integration …	Heinrich Heine University Dusseldorf; Heinrich Heine University Dusseldorf Hospital; Heinrich Heine University Dusseldorf; University of Cologne; University of Cologne	31	OXFORD UNIV PRESS INC	CARY	CLIN INFECT DIS	2022	23	8.2	10.1093/cid/ciab588	8	Immunology; Infectious Diseases; Microbiology	34181711	WOS:000755852300001
Long read sequencing reveals poxvirus evolution through rapid homogenization of gene arrays	Sasani, TA; Cone, KR; Quinlan, AR; Elde, NC	ELIFE	English	Article	/	VIRUS-DNA POLYMERASE; VACCINIA VIRUS; CONCERTED EVOLUTION; HOMOLOGOUS RECOMBINATION; DUPLICATED GENES; CONVERSION; GENOME; REASSORTMENT; MECHANISM; PATTERNS	Poxvirus adaptation can involve combinations of recombination-driven gene copy number variation and beneficial single nucleotide variants (SNVs) at the same loci. How these distinct mechanisms of genetic diversification might simultaneously facilitate adaptation to host immune defenses is unknown. We performed experimental evolution with vaccinia virus populations harboring a SNV in a gene active…	Utah System of Higher Education; University of Utah	63	eLIFE SCIENCES PUBL LTD	CAMBRIDGE	ELIFE	2018	23	6.4	10.7554/eLife.35453	24	Life Sciences & Biomedicine - Other Topics	30156554	WOS:000442981400001
Accurate Detection of HPV Integration Sites in Cervical Cancer Samples Using the Nanopore MinION Sequencer Without Error Correction	Yang, WJ; Liu, Y; Dong, RY; Liu, J; Lang, JD; Yang, JL; Wang, WW; Li, JJ; Meng, B; Tian, G	FRONTIERS IN GENETICS	English	Article	HPV; nanopore; integration; cervical cancer; next generation (deep) sequencing (NGS); third generation sequencing	RISK HUMAN-PAPILLOMAVIRUS; GENOMIC CHARACTERIZATION; DNA INTEGRATION; GENE; EXPRESSION	During the carcinogenesis of cervical cancer, the DNA of human papillomavirus (HPV) is frequently integrated into the human genome, which might be a biomarker for the early diagnosis of cervical cancer. Although the detection sensitivity of virus infection status increased significantly through the Illumina sequencing platform, there were still disadvantages remain for further improvement, includ…	Ministry of Education - China; Peking University; Nanjing University; Hunan University of Technology	58	FRONTIERS MEDIA SA	LAUSANNE	FRONT GENET	2020	23	2.8	10.3389/fgene.2020.00660	14	Genetics & Heredity	32714374	WOS:000551704100001
AmpliCoV: Rapid Whole-Genome Sequencing Using Multiplex PCR Amplification and Real-Time Oxford Nanopore MinION Sequencing Enables Rapid Variant Identification of SARS-CoV-2	Brinkmann, A; Ulm, SL; Uddin, S; Förster, S; Seifert, D; Oehme, R; Corty, M; Schaade, L; Michel, J; Nitsche, A	FRONTIERS IN MICROBIOLOGY	English	Article	SARS-CoV-2; MinION; whole-genome sequencing; ampliseq; mutation detection	RESPIRATORY-SYNDROME SARS; EBOLA-VIRUS; EPIDEMIOLOGY; ZIKA	Since the emergence of the Severe Acute Respiratory Syndrome Coronavirus-2 (SARS-CoV-2) in December 2019, the scientific community has been sharing data on epidemiology, diagnostic methods, and whole-genomic sequences almost in real time. The latter have already facilitated phylogenetic analyses, transmission chain tracking, protein modeling, the identification of possible therapeutic targets, ti…	Robert Koch Institute; Robert Koch Institute	28	FRONTIERS MEDIA SA	LAUSANNE	FRONT MICROBIOL	2021	23	4	10.3389/fmicb.2021.651151	9	Microbiology	34276587	WOS:000673618000001
Field diagnosis and genotyping of chikungunya virus using a dried reverse transcription loop-mediated isothermal amplification (LAMP) assay and MinION sequencing	Hayashida, K; Orba, Y; Sequeira, PC; Sugimoto, C; Hall, WW; Eshita, Y; Suzuki, Y; Runtuwene, L; Brasil, P; Calvet, G; Rodrigues, CDS; dos Santos, CC; Mares-Guia, MAM; Yamagishi, J; de Filippis, AMB; Sawa, H	PLOS NEGLECTED TROPICAL DISEASES	English	Article	/	OUTBREAK; INFECTION; STRAINS	Detection and sequencing of chikungunya virus (CHIKV) genome was performed using a combination of a modified reverse transcription loop-mediated isothermal amplification (RT-LAMP) method and a MinION sequencer. We developed the protocol for drying all the reagents for the RT-LAMP in a single reaction tube. Using this system, the CHIKV genome was effectively amplified under isothermal conditions, …	Hokkaido University; Fundacao Oswaldo Cruz; Hokkaido University; University College Dublin; University of Tokyo; Fundacao Oswaldo Cruz	45	PUBLIC LIBRARY SCIENCE	SAN FRANCISCO	PLOS NEGLECT TROP D	2019	23	3.4	10.1371/journal.pntd.0007480	15	Infectious Diseases; Parasitology; Tropical Medicine	31158221	WOS:000473779100055
Development and preliminary evaluation of a multiplexed amplification and next generation sequencing method for viral hemorrhagic fever diagnostics	Brinkmann, A; Ergünay, K; Radonic, A; Tufan, ZK; Domingo, C; Nitsche, A	PLOS NEGLECTED TROPICAL DISEASES	English	Article		REAL-TIME; VIRUS; IDENTIFICATION; SURVEILLANCE; TURKEY	Background We describe the development and evaluation of a novel method for targeted amplification and Next Generation Sequencing (NGS)-based identification of viral hemorrhagic fever (VHF) agents and assess the feasibility of this approach in diagnostics. Methodology An ultrahigh-multiplex panel was designed with primers to amplify all known variants of VHF-associated viruses and relevant contro…	Robert Koch Institute; Hacettepe University; Ankara Yildirim Beyazit University	26	PUBLIC LIBRARY SCIENCE	SAN FRANCISCO	PLOS NEGLECT TROP D	2017	23	3.4	10.1371/journal.pntd.0006075	13	Infectious Diseases; Parasitology; Tropical Medicine	29155823	WOS:000416832800043
Comparison of MiSeq, MinION, and hybrid genome sequencing for analysis of Campylobacter jejuni	Neal-McKinney, JM; Liu, KC; Lock, CM; Wu, WH; Hu, J	SCIENTIFIC REPORTS	English	Article	/	/	The sequencing, assembly, and analysis of bacterial genomes is central to tracking and characterizing foodborne pathogens. The bulk of bacterial genome sequencing at the US Food and Drug Administration is performed using short-read Illumina MiSeq technology, resulting in highly accurate but fragmented genomic sequences. The MinION sequencer from Oxford Nanopore is an evolving technology that prod…	US Food & Drug Administration (FDA)	23	NATURE PORTFOLIO	BERLIN	SCI REP-UK	2021	23	3.8	10.1038/s41598-021-84956-6	10	Science & Technology - Other Topics	33707610	WOS:000629620800004
Systematic benchmarking of nanopore Q20+kit in SARS-CoV-2 whole genome sequencing	Luo, JH; Meng, ZXR; Xu, XY; Wang, L; Zhao, KC; Zhu, XJ; Qiao, Q; Ge, YY; Mao, LF; Cui, LB	FRONTIERS IN MICROBIOLOGY	English	Article	nanopore sequencing; Q20+kit; SARS-CoV-2; coronavirus; accuracy	/	Whole genome sequencing provides rapid insight into key information about the Severe Acute Respiratory Syndrome Coronavirus 2 (SARS-CoV-2), such as virus typing and key mutation site, and this information is important for precise prevention, control and tracing of coronavirus disease 2019 (COVID-19) outbreak in conjunction with the epidemiological information of the case. Nanopore sequencing is w…	Nanjing Medical University; Jiangsu Provincial Center for Disease Control & Prevention	25	FRONTIERS MEDIA SA	LAUSANNE	FRONT MICROBIOL	2022	22	4	10.3389/fmicb.2022.973367	11	Microbiology	36312982	WOS:000875776100001
Ultrafast and Cost-Effective Pathogen Identification and Resistance Gene Detection in a Clinical Setting Using Nanopore Flongle Sequencing	Avershina, E; Frye, SA; Ali, J; Taxt, AM; Ahmad, R	FRONTIERS IN MICROBIOLOGY	English	Article	ONT sequencing; pathogen identification; antibiotic resistance gene (ARGs); clinical sample; Flongle	/	Rapid bacterial identification and antimicrobial resistance gene (ARG) detection are crucial for fast optimization of antibiotic treatment, especially for septic patients where each hour of delayed antibiotic prescription might have lethal consequences. This work investigates whether the Oxford Nanopore Technology's (ONT) Flongle sequencing platform is suitable for real-time sequencing directly f…	Inland Norway University of Applied Sciences; University of Oslo; UiT The Arctic University of Tromso	24	FRONTIERS MEDIA SA	LAUSANNE	FRONT MICROBIOL	2022	22	4	10.3389/fmicb.2022.822402	10	Microbiology	35369431	WOS:000779900900001
Utilization of Hybrid Assembly Approach to Determine the Genome of an Opportunistic Pathogenic Fungus, Candida albicans TIMM 1768	Panthee, S; Hamamoto, H; Ishijima, SA; Paudel, A; Sekimizu, K	GENOME BIOLOGY AND EVOLUTION	English	Article	Candida albicans; de novo assembly; genomics; pathogenesis; MinION sequencing	ORAL CANDIDIASIS; ACCURATE; SEQUENCE; MODEL	Candida albicans TIMM 1768 is a highly virulent strain utilized as a model organism for the study of gastrointestinal and oral candidiasis. Despite being a model strain, identification of its genetic determinants of pathogenesis is hindered by the unavailability of its genome sequence. In this study, we determined the genome sequence of C. albicans TIMM1768 using reads obtained from portable MinI…	Teikyo University	23	OXFORD UNIV PRESS	OXFORD	GENOME BIOL EVOL	2018	22	3.1	10.1093/gbe/evy166	6	Evolutionary Biology; Genetics & Heredity	30059981	WOS:000444553900014
Towards high quality real-time whole genome sequencing during outbreaks using Usutu virus as example	Munnink, BBO; Kik, M; de Bruijn, ND; Kohl, R; van der Linden, A; Reusken, CBEM; Koopmans, M	INFECTION GENETICS AND EVOLUTION	English	Article	Nanopore; Sequencing; USUV; Arboviruses	STRAINS; ALGORITHM; ALIGNMENT; SEARCH	Recently, protocols for amplicon based whole genome sequencing using Nanopore technology have been described for Ebola virus, Zika virus, yellow fever virus and West Nile virus. However, there is some debate regarding reliability of sequencing using this technology, which is important for applications beyond diagnosis such as linking lineages to outbreaks, tracking transmission pathways and pocke…	Erasmus University Rotterdam; Erasmus MC; Utrecht University; Netherlands National Institute for Public Health & the Environment	45	ELSEVIER	AMSTERDAM	INFECT GENET EVOL	2019	22	2.6	10.1016/j.meegid.2019.04.015	6	Infectious Diseases	31014969	WOS:000482092100008
A Cluster of Colistin- and Carbapenem-Resistant Klebsiella pneumoniae Carrying blaNDM-1 and mcr-8.2	Ma, K; Feng, Y; Liu, L; Yao, ZH; Zong, ZY	JOURNAL OF INFECTIOUS DISEASES	English	Article	colistin resistance; Klebsiella pneumoniae; mcr; plasmid	READ ALIGNMENT; PLASMIDS; GENE; IDENTIFICATION; VIRULENCE; SEQUENCE	Background. Klebsiella pneumoniae resistant to both carbapenems and colistin imposes severe challenges for management. In this study, we report a cluster of 5 carbapenem-resistant K pneumoniae clinical strains belonging to ST1 and K57 types, 4 of which were also resistant to colistin, from 2 hospitals. Methods. The 5 strains were subjected to whole-genome sequencing (WGS) using the short-read Ill…	Sichuan University; Sichuan University; Sichuan University; Sichuan University	30	OXFORD UNIV PRESS INC	CARY	J INFECT DIS	2020	22	5	10.1093/infdis/jiz519	6	Immunology; Infectious Diseases; Microbiology	31822905	WOS:000532694700013
DNA extraction from primary liquid blood cultures for bloodstream infection diagnosis using whole genome sequencing	Anson, LW; Chau, K; Sanderson, N; Hoosdally, S; Bradley, P; Iqbal, Z; Phan, H; Foster, D; Oakley, S; Morgan, M; Peto, TEA; Crook, DW; Pankhurst, LJ	JOURNAL OF MEDICAL MICROBIOLOGY	English	Article	bloodstream infection; sepsis; bacteraemia; whole genome sequencing	TIME PCR ASSAY; STAPHYLOCOCCUS-AUREUS; IDENTIFICATION; BACTEREMIA; RESISTANCE; IMPACT; SURVEILLANCE	Purpose. Speed of bloodstream infection diagnosis is vital to reduce morbidity and mortality. Whole genome sequencing (WGS) performed directly from liquid blood culture could provide single-assay species and antibiotic susceptibility prediction; however, high inhibitor and human cell/DNA concentrations limit pathogen recovery. We develop a method for the preparation of bacterial DNA for WGS-based…	University of Oxford; University of Oxford; Wellcome Centre for Human Genetics; University of Oxford; Oxford University Hospitals NHS Foundation Trust; University of Oxford; University of Oxford; Public Health England	37	MICROBIOLOGY SOC	LONDON	J MED MICROBIOL	2018	22	2.4	10.1099/jmm.0.000664	11	Microbiology	29458686	WOS:000429657700011
Genomic detection of a virus lineage replacement event of dengue virus serotype 2 in Brazil, 2019	de Jesus, JG; Dutra, KR; Sales, FCD; Claro, IM; Terzian, AC; Candido, DD; Hill, SC; Thézé, J; Torres, C; D'Agostini, TL; Felix, AC; Reis, AFN; Alcantar, LC; de Abreu, AL; Croda, JHR; de Oliveira, WK; de Filipis, AMB; Camis, MDRD; Romano, CM; Loman, NJ; Pybus, OG; Sabino, EC; Nogueira, ML; Faria, NR	MEMORIAS DO INSTITUTO OSWALDO CRUZ	English	Article	dengue 2; outbreak; genomic surveillance; lineage replacement; Brazil	ZIKA VIRUS; CIRCULATION	BACKGROUND Despite efforts to mitigate the impact of dengue virus (DENV) epidemics, the virus remains a public health problem in tropical and subtropical regions around the world. Most DENV cases in the Americas between January and July 2019 were reported in Brazil. Sao Paulo State in the southeast of Brazil has reported nearly half of all DENV infections in the country. OBJECTIVES To understand …	Universidade de Sao Paulo; Faculdade de Medicina de Sao Jose do Rio Preto (FAMERP); University of Oxford; Fundacao Oswaldo Cruz; Universidade Federal de Minas Gerais; Universidade Federal da Grande Dourados; Fundacao Oswaldo Cruz; Universidade de Sao Paulo; University of Birmingham	28	FUNDACO OSWALDO CRUZ	RIO DE JANEIRO, RJ	MEM I OSWALDO CRUZ	2020	22	2.5	10.1590/0074-02760190423	6	Parasitology; Tropical Medicine	32428189	WOS:000537066200001
Rapid Detection of Genetic Engineering, Structural Variation, and Antimicrobial Resistance Markers in Bacterial Biothreat Pathogens by Nanopore Sequencing	Gargis, AS; Cherney, B; Conley, AB; McLaughlin, HP; Sue, D	SCIENTIFIC REPORTS	English	Article	/	YERSINIA-PESTIS; BACILLUS-ANTHRACIS; SUSCEPTIBILITY DETERMINATION; GENOME SEQUENCE; PLASMID; BIOTERRORISM; EVOLUTION; PLAGUE; DIVERSITY; ALIGNMENT	Widespread release of Bacillus anthracis (anthrax) or Yersinia pestis (plague) would prompt a public health emergency. During an exposure event, high-quality whole genome sequencing (WGS) can identify genetic engineering, including the introduction of antimicrobial resistance (AMR) genes. Here, we developed rapid WGS laboratory and bioinformatics workflows using a long-read nanopore sequencer (Mi…	Centers for Disease Control & Prevention - USA; IHRC, Inc.; Centers for Disease Control & Prevention - USA	71	NATURE PORTFOLIO	BERLIN	SCI REP-UK	2019	22	3.8	10.1038/s41598-019-49700-1	14	Science & Technology - Other Topics	31534162	WOS:000486379300006
An identification protocol for ESBL-producing Gram-negative bacteria bloodstream infections using a MinION nanopore sequencer	Sakai, J; Tarumoto, N; Kodana, M; Ashikawa, S; Imai, K; Kawamura, T; Ikebuchi, K; Murakami, T; Mitsutake, K; Maeda, T; Maesaki, S	JOURNAL OF MEDICAL MICROBIOLOGY	English	Article	MinION; nanopore sequencer; extended-spectrum beta-lactamase; bloodstream infection; MALDI-TOF MS; 16S rRNA	RAPID DETECTION; DNA EXTRACTION; RESISTANCE; EPIDEMIOLOGY; TIME; ENTEROBACTERIACEAE; CEPHALOSPORINS; PATHOGENS; EXPANSION; CULTURES	Purpose. The new third-generation sequencing platform MinION is an attractive maintenance-free and disposable portable tool that can perform long-read and real-time sequencing. In this study, we validated this technology for the identification of pathogens from positive blood culture (BC) bottles. Methodology. A total of 38 positive BC bottles were collected from patients with bloodstream infecti…	Saitama Medical University; Saitama Medical University; Saitama Medical University; Saitama Medical University; Saitama Medical University; Saitama Medical University; National Defense Medical College - Japan	35	MICROBIOLOGY SOC	LONDON	J MED MICROBIOL	2019	21	2.4	10.1099/jmm.0.001024	8	Microbiology	31237534	WOS:000478075800012
Nanopore Sequencing Is a Credible Alternative to Recover Complete Genomes of Geminiviruses	Ben Chehida, S; Filloux, D; Fernandez, E; Moubset, O; Hoareau, M; Julian, C; Blondin, L; Lett, JM; Roumagnac, P; Lefeuvre, P	MICROORGANISMS	English	Article	MinION; nanopore sequencing; rolling circle amplification; viral metagenomics; CRESS DNA; capulavirus; homopolymer	VIRUS METAGENOMICS; DNA; MINION; PLANT; PATHOGENS; CHARACTERIZE; EVOLUTIONARY; TAXONOMY; AGE	Next-generation sequencing (NGS), through the implementation of metagenomic protocols, has led to the discovery of thousands of new viruses in the last decade. Nevertheless, these protocols are still laborious and costly to implement, and the technique has not yet become routine for everyday virus characterization. Within the context of CRESS DNA virus studies, we implemented two alternative long…	CIRAD; CIRAD; Universite de Montpellier; Institut Agro; Universite de Montpellier; Institut de Recherche pour le Developpement (IRD); CIRAD; INRAE	77	MDPI	BASEL	MICROORGANISMS	2021	21	4.1	10.3390/microorganisms9050903	15	Microbiology	33922452	WOS:000662384800001
TheSalmonella entericaPlasmidome as a Reservoir of Antibiotic Resistance	Emond-Rheault, JG; Hamel, J; Jeukens, J; Freschi, L; Kukavica-Ibrulj, I; Boyle, B; Tamber, S; Malo, D; Franz, E; Burnett, E; Daigle, F; Arya, G; Sanderson, K; Wiedmann, M; Slawson, RM; Weadge, JT; Stephan, R; Bekal, S; Gruenheid, S; Goodridge, LD; Levesque, RC	MICROORGANISMS	English	Article	plasmid; Salmonella enterica; antimicrobial resistance; long-read sequencing; hybrid assembly	SALMONELLA-ENTERICA; ANTIMICROBIAL RESISTANCE; TETRACYCLINE RESISTANCE; ESCHERICHIA-COLI; COMPARATIVE GENOMICS; MOLECULAR-BIOLOGY; INCA/C PLASMIDS; GENES; SEROVARS; PREVALENCE	The emergence of multidrug-resistant bacterial strains worldwide has become a serious problem for public health over recent decades. The increase in antimicrobial resistance has been expanding via plasmids as mobile genetic elements encoding antimicrobial resistance (AMR) genes that are transferred vertically and horizontally. This study focuses onSalmonella enterica, one of the leading foodborne…	Laval University; Health Canada; McGill University; McGill University; McGill University; Netherlands National Institute for Public Health & the Environment; McGill University; Universite de Montreal; Public Health Agency of Canada; University of Calgary; Cornell University; Wilfrid Laurier University; University of Zurich; McGill University; University of Guelph	64	MDPI	BASEL	MICROORGANISMS	2020	21	4.1	10.3390/microorganisms8071016	18	Microbiology	32650601	WOS:000554243700001
Tracking SARS-COV-2 variants using Nanopore sequencing in Ukraine in 2021	Yakovleva, A; Kovalenko, G; Redlinger, M; Liulchuk, MG; Bortz, E; Zadorozhna, VI; Scherbinska, AM; Wertheim, JO; Goodfellow, I; Meredith, L; Vasylyeva, TI	SCIENTIFIC REPORTS	English	Article	/	EPIDEMIC	The use of real-time genomic epidemiology has enabled the tracking of the global spread of severe acute respiratory syndrome coronavirus 2 (SARS-CoV-2), informing evidence-based public health decision making. Ukraine has experienced four waves of the Coronavirus Disease 2019 (COVID-19) between spring 2020 and spring 2022. However, insufficient capacity for local genetic sequencing limited the pot…	University of Oxford; University of California System; University of California San Diego; University of Cambridge; University of Alaska System; University of Alaska Anchorage; National Academy of Medical Sciences of Ukraine	43	NATURE PORTFOLIO	BERLIN	SCI REP-UK	2022	21	3.8	10.1038/s41598-022-19414-y	9	Science & Technology - Other Topics	36131001	WOS:000858344700007
First Report of an Extensively Drug-Resistant ST23 Klebsiella pneumoniae of Capsular Serotype K1 Co-Producing CTX-M-15, OXA-48 and ArmA in Spain	Hernández, M; López-Urrutia, L; Abad, D; Serna, MD; Ocampo-Sosa, AA; Eiros, JM	ANTIBIOTICS-BASEL	English	Article	Klebsiella pneumoniae; OXA-48; CTX-M-15; ArmA; hybrid virulence; resistance plasmids; extensively drug-resistant; hypervirulent Klebsiella pneumoniae	/	An extensively drug-resistant (XDR) Klebsiella pneumoniae isolate MS3802 from a tracheostomy exudate was whole-genome sequenced using MiSeq and Oxford Nanopore MinION platforms in order to identify the antimicrobial resistance and virulence determinates and their genomic context. Isolate MS3802 belonged to the clone ST23 and presented a capsular serotype K1, associated with hypervirulent K. pneum…	Hospital del Rio Hortega; Hospital Universitario Marques de Valdecilla (HUMV)	62	MDPI	BASEL	ANTIBIOTICS-BASEL	2021	20	4.3	10.3390/antibiotics10020157	12	Infectious Diseases; Pharmacology & Pharmacy	33557209	WOS:000622070300001
Emergence in southern France of a new SARS-CoV-2 variant harbouring both N501Y and E484K substitutions in the spike protein	Colson, P; Delerce, J; Burel, E; Dahan, J; Jouffret, A; Fenollar, F; Yahi, N; Fantini, J; La Scola, B; Raoult, D	ARCHIVES OF VIROLOGY	English	Article	/	/	SARS-CoV-2 variants have become a major virological, epidemiological, and clinical concern, particularly with regard to the risk of escape from vaccine-induced immunity. Here, we describe the emergence of a new variant, with the index case returning from travel in Cameroon. For 13 SARS-CoV-2-positive patients living in the same geographical area of southeastern France, a qPCR test for screening v…	Aix-Marseille Universite; Aix-Marseille Universite; Institut de Recherche pour le Developpement (IRD); Aix-Marseille Universite; Assistance Publique-Hopitaux de Marseille; Institut de Recherche pour le Developpement (IRD); Aix-Marseille Universite; Institut National de la Sante et de la Recherche Medicale (Inserm); Aix-Marseille Universite	21	SPRINGER WIEN	Vienna	ARCH VIROL	2022	20	2.5	10.1007/s00705-022-05385-y	6	Virology	35178586	WOS:000757236000001
Rapid sequencing-based diagnosis of infectious bacterial species from meningitis patients in Zambia	Nakagawa, S; Inoue, S; Kryukov, K; Yamagishi, J; Ohno, A; Hayashida, K; Nakazwe, R; Kalumbi, M; Mwenya, D; Asami, N; Sugimoto, C; Mutengo, MM; Imanishi, T	CLINICAL & TRANSLATIONAL IMMUNOLOGY	English	Article	meningitis; meta 16S rRNA sequencing; microbiome; nanopore sequencing; rapid diagnosis	UNITED-STATES; IDENTIFICATION; ENCEPHALITIS	Objectives We have developed a portable system for the rapid determination of bacterial composition for the diagnosis of infectious diseases. Our system comprises of a nanopore technology-based sequencer, MinION, and two laptop computers. To examine the accuracy and time efficiency of our system, we provided a proof-of-concept for the detection of the causative bacteria of 11 meningitis patients …	Tokai University; Tokai University; Tokai University; Kobe University; Hokkaido University; Hokkaido University; University of Zambia	32	WILEY	HOBOKEN	CLIN TRANSL IMMUNOL	2019	20	4.6	10.1002/cti2.1087	11	Immunology	31709051	WOS:000499997800004
Nanopore MinION Sequencing Reveals Possible Transfer ofblaKPC-2Plasmid Across Bacterial Species in Two Healthcare Facilities	Prussing, C; Snavely, EA; Singh, N; Lapierre, P; Lasek-Nesselquist, E; Mitchell, K; Haas, W; Owsiak, R; Nazarian, E; Musser, KA	FRONTIERS IN MICROBIOLOGY	English	Article	carbapenem-resistant enterobacteriaceae; klebsiellapneumoniae carbapenemase; horizontal gene transfer; plasmids; long-read sequencing; hybrid genome assembly; molecular epidemiology	READ ALIGNMENT; UNITED-STATES; GENE; DISSEMINATION; PLASMIDS; ENTEROBACTERIACEAE; PNEUMONIAE; AEROSOL; LONG; EPIDEMIOLOGY	Carbapenemase-producingEnterobacteriaceaeare a major threat to global public health.Klebsiella pneumoniaecarbapenemase (KPC) is the most commonly identified carbapenemase in the United States and is frequently found on mobile genetic elements including plasmids, which can be horizontally transmitted between bacteria of the same or different species. Here we describe the results of an epidemiologi…	Wadsworth Center; State University of New York (SUNY) System; Centers for Disease Control & Prevention - USA; Utah System of Higher Education; University of Utah; ARUP Laboratories	69	FRONTIERS MEDIA SA	LAUSANNE	FRONT MICROBIOL	2020	20	4	10.3389/fmicb.2020.02007	11	Microbiology	32973725	WOS:000570159500001
Optimization and evaluation of viral metagenomic amplification and sequencing procedures toward a genome-level resolution of the human fecal DNA virome	Wang, GY; Li, SH; Yan, QL; Guo, RC; Zhang, Y; Chen, F; Tian, XG; Lv, QB; Jin, H; Ma, XC; Ma, YF	JOURNAL OF ADVANCED RESEARCH	English	Article	Fecal DNA virome; Virus-like particles; Optimal method; High-quality viral genome; Nanopore sequencing	MULTIPLE DISPLACEMENT AMPLIFICATION; VIRUSES; DIVERSITY; ALIGNMENT; TWINS	Introduction: Viruses in the human gut have been linked to health and disease. Deciphering the gut vir-ome is dependent on metagenomic sequencing of the virus-like particles (VLPs) purified from the fecal specimens. A major limitation of conventional viral metagenomic sequencing is the low recoverability of viral genomes from the metagenomic dataset. Objectives: To develop an optimal method for v…	Dalian Medical University; Dalian Medical University; China Agricultural University	71	ELSEVIER	AMSTERDAM	J ADV RES	2023	20	11.4	10.1016/j.jare.2022.08.011	12	Science & Technology - Other Topics	35995413	WOS:001013441000001
Application of Nanopore Sequencing in the Diagnosis and Treatment of Pulmonary Infections	Chen, J; Xu, F	MOLECULAR DIAGNOSIS & THERAPY	English	Review	/	REAL-TIME; SINGLE-MOLECULE; DNA; GENOME; MINION; IDENTIFICATION; SENSITIVITY; MECHANISMS; TESTS	This review provides an in-depth discussion of the development, principles and utility of nanopore sequencing technology and its diverse applications in the identification of various pulmonary pathogens. We examined the emergence and advancements of nanopore sequencing as a significant player in this field. We illustrate the challenges faced in diagnosing mixed infections and further scrutinize t…	Zhejiang University	102	ADIS INT LTD	NORTHCOTE	MOL DIAGN THER	2023	20	4.1	10.1007/s40291-023-00669-8	17	Genetics & Heredity; Pharmacology & Pharmacy	37563539	WOS:001044971300001
Clinical and Molecular Description of a High-Copy IncQ1 KPC-2 Plasmid Harbored by the International ST15 Klebsiella pneumoniae Clone	Martins, WMBS; Nicolas, MF; Yu, Y; Li, M; Dantas, P; Sands, K; Portal, E; Almeida, LGP; Vasconcelos, ATR; Medeiros, EA; Toleman, MA; Walsh, TR; Gales, AC; Andrey, DO	MSPHERE	English	Article	Gram-negative bacteria; IncQ1; KPC-2; Klebsiella pneumoniae; ST15; bloodstream infections; carbapenemase; plasmid-mediated resistance	DISSEMINATION; EPIDEMIOLOGY; EXPANSION; BIOLOGY; SPREAD; ST437	This study provides the genomic characterization and clinical description of bloodstream infections (BSI) cases due to ST15 KPC-2 producer Klebsiella pneumoniae. Six KPC-K. pneumoniae isolates were recovered in 2015 in a tertiary Brazilian hospital and were analyzed by whole genome sequencing (WGS) (Illumina MiSeq short reads). Of these, two isolates were further analyzed by Nanopore MinION seque…	Cardiff University; Universidade Federal de Sao Paulo (UNIFESP); Laboratorio Nacional de Computacao Cientifica (LNCC); South China Agricultural University; Universidade Federal de Sao Paulo (UNIFESP); University of Geneva; University of Geneva	48	AMER SOC MICROBIOLOGY	WASHINGTON	MSPHERE	2020	20	3.7	10.1128/mSphere.00756-20	10	Microbiology	33028683	WOS:000579365500035
Evaluation of full-length nanopore 16S sequencing for detection of pathogens in microbial keratitis	Low, L; Fuentes-Utrilla, P; Hodson, J; O'Neil, JD; Rossiter, AE; Begum, G; Suleiman, K; Murray, PI; Wallace, GR; Loman, NJ; Rauz, S	PEERJ	English	Article	Nanopore sequencing; Eye infection; Microbial keratitis; Full length 16S rRNA sequencing; Cornea infection; Eye swab; 16S bioinformatics; Corneal infection; Ophthalmology; Molecular diagnostics	POLYMERASE-CHAIN-REACTION; BACTERIAL KERATITIS; DNA COLLECTION; REAL-TIME; CD-HIT; IDENTIFICATION; RESISTANCE; DIAGNOSIS; MINION; VIRUS	Background: Microbial keratitis is a leading cause of preventable blindness worldwide. Conventional sampling and culture techniques are time-consuming, with over 40% of cases being culture-negative. Nanopore sequencing technology is portable and capable of generating long sequencing reads in real-time. The aim of this study is to evaluate the potential of nanopore sequencing directly from clinica…	University of Birmingham; University of Birmingham; University of Birmingham; University of Birmingham; University of Birmingham	80	PEERJ INC	LONDON	PEERJ	2021	20	2.3	10.7717/peerj.10778	24	Science & Technology - Other Topics	33628638	WOS:000618066000004
A streamlined clinical metagenomic sequencing protocol for rapid pathogen identification	Jia, XF; Hu, L; Wu, M; Ling, Y; Wang, W; Lu, HZ; Yuan, ZH; Yi, ZG; Zhang, XN	SCIENTIFIC REPORTS	English	Article		NEXT-GENERATION; DIAGNOSIS; INFECTION; VIRUS	Metagenomic next-generation sequencing (mNGS) holds promise as a diagnostic tool for unbiased pathogen identification and precision medicine. However, its medical utility depends largely on assay simplicity and reproducibility. In the current study, we aimed to develop a streamlined Illumina and Oxford Nanopore-based DNA/RNA library preparation protocol and rapid data analysis pipeline. The Illum…	Fudan University; Fudan University	49	NATURE PORTFOLIO	BERLIN	SCI REP-UK	2021	20	3.8	10.1038/s41598-021-83812-x	10	Science & Technology - Other Topics	33623127	WOS:000626731000028
Simultaneous detection and comprehensive analysis of HPV and microbiome status of a cervical liquid-based cytology sample using Nanopore MinION sequencing	Quan, LL; Dong, RY; Yang, WJ; Chen, LY; Lang, JD; Liu, J; Song, Y; Ma, SQ; Yang, JL; Wang, WW; Meng, B; Tian, G	SCIENTIFIC REPORTS	English	Article	/	HUMAN-PAPILLOMAVIRUS; INTEGRATION; BACTERIAL; IDENTIFICATION; GREENGENES; DIAGNOSIS; SITES; DNA	Human papillomavirus (HPV) is a major pathogen that causes cervical cancer and many other related diseases. HPV infection related cervical microbiome could be an induce factor of cervical cancer. However, it is uncommon to find a single test on the market that can simultaneously provide information on both HPV and the microbiome. Herein, a novel method was developed in this study to simultaneousl…	Henan University of Science & Technology; Chinese Academy of Medical Sciences - Peking Union Medical College; Peking Union Medical College Hospital	86	NATURE PORTFOLIO	BERLIN	SCI REP-UK	2019	20	3.8	10.1038/s41598-019-55843-y	13	Science & Technology - Other Topics	31852945	WOS:000507585600007
Portable sequencing of Mycobacterium tuberculosis for clinical and epidemiological applications	Gómez-González, PJ; Campino, S; Phelan, JE; Clark, TG	BRIEFINGS IN BIOINFORMATICS	English	Article	Mycobacterum tuberculosis; tuberculosis; sequencing; genomics; mutations	/	With >1 million associated deaths in 2020, human tuberculosis (TB) caused by the bacteria Mycobacterium tuberculosis remains one of the deadliest infectious diseases. A plethora of genomic tools and bioinformatics pipelines have become available in recent years to assist the whole genome sequencing of M. tuberculosis. The Oxford Nanopore Technologies (ONT) portable sequencer is a promising platfo…	University of London; London School of Hygiene & Tropical Medicine	36	OXFORD UNIV PRESS	OXFORD	BRIEF BIOINFORM	2022	19	6.8	10.1093/bib/bbac256	10	Biochemistry & Molecular Biology; Mathematical & Computational Biology	35894606	WOS:000834324900001
The Applications of Nanopore Sequencing Technology in Pathogenic Microorganism Detection	Zhu, XJ; Yan, SS; Yuan, FH; Wan, SG	CANADIAN JOURNAL OF INFECTIOUS DISEASES & MEDICAL MICROBIOLOGY	English	Review	/	REAL-TIME; MICROBIAL GENOMES; OPPORTUNITIES; EPIDEMIOLOGY; CORONAVIRUS; SENSITIVITY; DIAGNOSTICS; DESIGN; VIRUS; CHINA	Infectious diseases are major threats to human health and lead to a serious public health burden. The emergence of new pathogens and the mutation of known pathogens challenge our ability to diagnose and control infectious diseases. Nanopore sequencing technology exhibited versatile applications in pathogenic microorganism detection due to its flexible data throughput. This review article introduc…	Gannan Medical University; Gannan Medical University; Ministry of Education - China; Gannan Medical University	82	HINDAWI LTD	LONDON	CAN J INFECT DIS MED	2020	19	2.6	10.1155/2020/6675206	8	Infectious Diseases; Microbiology	33488885	WOS:000610156700001
Intra-host non-synonymous diversity at a neutralizing antibody epitope of SARS-CoV-2 spike protein N-terminal domain	Ip, JD; Kok, KH; Chan, WM; Chu, AWH; Wu, WL; Yip, CCY; To, WK; Tsang, OTY; Leung, WS; Chik, TSH; Chan, KH; Hung, IFN; Yuen, KY; To, KKW	CLINICAL MICROBIOLOGY AND INFECTION	English	Article	COVID-19; Illumina sequencing; Intra-host diversity; Nanopore sequencing; Neutralizing antibody; Non-synonymous mutation; Spike	OPEN-LABEL; COMBINATION; DISEASE	Objectives: SARS-CoV-2 has evolved rapidly into several genetic clusters. However, data on mutations during the course of infection are scarce. This study aims to determine viral genome diversity in serial samples of COVID-19 patients. Methods: Targeted deep sequencing of the spike gene was performed on serial respiratory specimens from COVID-19 patients using nanopore and Illumina sequencing. Sa…	University of Hong Kong; University of Hong Kong; University of Hong Kong	30	ELSEVIER SCI LTD	OXFORD	CLIN MICROBIOL INFEC	2021	19	10.9	10.1016/j.cmi.2020.10.030	5	Infectious Diseases; Microbiology	33144203	WOS:000691800900031
A nationwide genomic study of clinical Klebsiella pneumoniae in Norway 2001-15: introduction and spread of ESBLs facilitated by clonal groups CG15 and CG307	Fostervold, A; Hetland, MAK; Bakksjo, R; Bernhoff, E; Holt, KE; Samuelsen, O; Simonsen, GS; Sundsfjord, A; Wyres, KL; Löhr, IH	JOURNAL OF ANTIMICROBIAL CHEMOTHERAPY	English	Article	/	READ ALIGNMENT; RESISTANCE; CARRIAGE; PLASMIDS	Objectives: To use the nationwide Norwegian surveillance programme on resistant microbes in humans (NORM) to address longitudinal changes in the population structure of Klebsiella pneumoniae isolates from 2001-15, focusing on the emergence and dissemination of ESBL-producing K. pneumoniae in Norway. Methods: Among blood (n = 6124) and urinary tract (n = 5496) surveillance isolates from 2001-15, w…	Stavanger University Hospital; University of Bergen; University of Bergen; Monash University; University of London; London School of Hygiene & Tropical Medicine; UiT The Arctic University of Tromso; University Hospital of North Norway; UiT The Arctic University of Tromso; UiT The Arctic University of Tromso; UiT The Arctic University of Tromso; University Hospital of North Norway	49	OXFORD UNIV PRESS	OXFORD	J ANTIMICROB CHEMOTH	2022	19	3.9	10.1093/jac/dkab463	10	Infectious Diseases; Microbiology; Pharmacology & Pharmacy	34935048	WOS:000756782900001
Characterisation of mcr-4.3 in a colistin-resistant Acinetobacter nosocomialis clinical isolate from Cape Town, South Africa	Snyman, Y; Reuter, S; Whitelaw, AC; Stein, L; Maloba, MRB; Newton-Foot, M	JOURNAL OF GLOBAL ANTIMICROBIAL RESISTANCE	English	Article	Polymyxin resistance; mcr-4; 3; Acinetobacter spp; South Africa; Whole-genome sequencing; Plasmid	ESCHERICHIA-COLI; LIPOPOLYSACCHARIDE	Objectives: Colistin resistance in Acinetobacter spp. is increasing, resulting in potentially untreatable nosocomial infections. Plasmid-mediated colistin resistance is of particular concern due to its low fitness cost and potential transferability to other bacterial strains and species. This study investigated the colistin resistance mechanism in a clinical Acinetobacter nosocomialis isolate fro…	Stellenbosch University; University of Cape Town; University of Freiburg; Tygerberg Hospital; University of the Free State	36	ELSEVIER SCI LTD	OXFORD	J GLOB ANTIMICROB RE	2021	19	3.7	10.1016/j.jgar.2021.03.002BY-	5	Infectious Diseases; Pharmacology & Pharmacy	33757821	WOS:000664031300020
Assessment of two-pool multiplex long-amplicon nanopore sequencing of SARS-CoV-2	Liu, HJ; Li, JH; Lin, YF; Bo, XC; Song, HB; Li, KB; Li, P; Ni, M	JOURNAL OF MEDICAL VIROLOGY	English	Article	genome; multiplex polymerase chain reaction; nanopore sequencing; SARS-CoV-2; viral	MINION; VIRUS	Genomic surveillance of severe acute respiratory syndrome coronavirus 2 (SARS-CoV-2) plays an important role in COVID-19 pandemic control and elimination efforts, especially by elucidating its global transmission network and illustrating its viral evolution. The deployment of multiplex PCR assays that target SARS-CoV-2 followed by either massively parallel or nanopore sequencing is a widely-used …	Academy of Military Medical Sciences - China; Academy of Military Medical Sciences - China	40	WILEY	HOBOKEN	J MED VIROL	2022	19	6.8	10.1002/jmv.27336	8	Virology	34524690	WOS:000698506800001
Nanopore-only assemblies for genomic surveillance of the global priority drug- resistant pathogen, Klebsiella pneumoniae	Foster-Nyarko, E; Cottingham, H; Wick, RR; Judd, LM; Lam, MMC; Wyres, KL; Stanton, TD; Tsang, KK; David, S; Aanensen, DM; Brisse, S; Holt, KE	MICROBIAL GENOMICS	English	Article	AMR; bacterial pathogens; basecalling; benchmarking; genomic surveillance; Klebsiella pneumoniae; MLST; phylogenetic clustering; serotyping; Nanopore sequencing	KLEBSIELLA-PNEUMONIAE; QUALITY; VACCINE	Oxford Nanopore Technologies (ONT) sequencing has rich potential for genomic epidemiology and public health investigations of bacterial pathogens, particularly in low- resource settings and at the point of care, due to its portability and affordability. However, low base- call accuracy has limited the reliability of ONT data for critical tasks such as antimicrobial resistance (AMR) and virulence …	University of London; London School of Hygiene & Tropical Medicine; Monash University; University of Oxford; Pasteur Network; Universite Paris Cite; Institut Pasteur Paris	90	MICROBIOLOGY SOC	LONDON	MICROB GENOMICS	2023	19	4	10.1099/mgen.0.000936	16	Genetics & Heredity; Microbiology	36752781	WOS:000936918400008
Acquisition and loss of CTX-M plasmids in Shigella species associated with MSM transmission in the UK	Locke, RK; Greig, DR; Jenkins, C; Dallman, TJ; Cowley, LA	MICROBIAL GENOMICS	English	Article	antimicrobial resistance; CTX-M; ESBL; MSM; public health; Shigella	ANTIBIOTIC-RESISTANCE; DIARRHEAL DISEASE; SEQUENCE; ENGLAND; IDENTIFICATION; VIRULENCE; CHILDREN; WALES; SPP.; SEX	Shigellosis in men who have sex with men (MSM) is caused by multidrug resistant Shigellae, exhibiting resistance to anti-microbials including azithromycin, ciprofloxacin and more recently the third-generation cephalosporins. We sequenced four bla(CTX-M-27)-positive MSM Shigella isolates (2018-20) using Oxford Nanopore Technologies: three S. sonnei (identified as two MSM clade 2, one MSM clade 5) …	University of Bath; Public Health England; University of Edinburgh; UK Research & Innovation (UKRI); Biotechnology and Biological Sciences Research Council (BBSRC); Roslin Institute; University of Edinburgh	77	MICROBIOLOGY SOC	LONDON	MICROB GENOMICS	2021	19	4	10.1099/mgen.0.000644	16	Genetics & Heredity; Microbiology	34427554	WOS:000692560600007
Rapid Diagnostics of Orthopaedic-Implant-Associated Infections Using Nanopore Shotgun Metagenomic Sequencing on Tissue Biopsies	Noone, JC; Helmersen, K; Leegaard, TM; Skråmm, I; Aamot, HV	MICROORGANISMS	English	Article	nanopore shotgun metagenomics; orthopaedic-implant-associated infections; rapid diagnostics	/	Conventional culture-based diagnostics of orthopaedic-implant-associated infections (OIAIs) are arduous. Hence, the aim of this study was to evaluate a culture-independent, rapid nanopore-based diagnostic protocol with regard to (a) pathogen identification, (b) time to pathogen identification, and (c) identification of antimicrobial resistance (AMR). This prospective proof-of-concept study includ…	University of Oslo; University of Oslo; University of Oslo; University of Oslo; University of Oslo	33	MDPI	BASEL	MICROORGANISMS	2021	19	4.1	10.3390/microorganisms9010097	11	Microbiology	33406597	WOS:000610580900001
Genomic Epidemiology of Carbapenem-Resistant Klebsiella in Qatar: Emergence and Dissemination of Hypervirulent Klebsiella pneumoniae Sequence Type 383 Strains	Tsui, CKM; Ben Abid, F; Al Ismail, K; McElheny, CL; Al Maslamani, M; Omrani, AS; Doi, Y	ANTIMICROBIAL AGENTS AND CHEMOTHERAPY	English	Article	carbapenem resistance; genomics; molecular epidemiology; virulence; hybrid plasmid; Klebsiella	MOLECULAR CHARACTERIZATION; ANTIMICROBIAL RESISTANCE; VIRULENCE; PLASMIDS; ST383; OXA-48; GENES	The emergence of carbapenem-resistant, hypervirulent Klebsiella pneumoniae is a new threat to health care. We studied the molecular epidemiology of carbapenem-resistant Klebsiella pneumoniae isolates in Qatar using whole-genome sequence data. The emergence of carbapenem-resistant, hypervirulent Klebsiella pneumoniae is a new threat to health care. We studied the molecular epidemiology of carbapen…	Tan Tock Seng Hospital; National Centre for Infectious Diseases Singapore; Nanyang Technological University; University of British Columbia; Qatar Foundation (QF); Weill Cornell Medical College Qatar; Hamad Medical Corporation; Hamad Medical Corporation; Pennsylvania Commonwealth System of Higher Education (PCSHE); University of Pittsburgh; Qatar University; Fujita Health University; Fujita Healt…	60	AMER SOC MICROBIOLOGY	WASHINGTON	ANTIMICROB AGENTS CH	2023	18	4.1	10.1128/aac.00030-23	16	Microbiology; Pharmacology & Pharmacy	37310284	WOS:001005287100001
Nanopore 16S Amplicon Sequencing Enhances the Understanding of Pathogens in Medically Intractable Diabetic Foot Infections	Moon, J; Kim, N; Lee, HS; Lee, ST; Jung, KH; Park, KI; Lee, SK; Lee, DO; Lee, DY; Chu, K	DIABETES	English	Article	/	ANTIBIOTIC-THERAPY; MICROBIOLOGY; IDENTIFICATION; OSTEOMYELITIS; BACTERIA	Diabetic foot infections (DFIs) cause substantial morbidity and mortality. The mainstay of the treatment is empiric antibiotics and surgical debridement in severe cases. In this study, we performed nanopore 16S rDNA sequencing from the debridement specimens of DFIs. Fifty-four surgical debridement specimens obtained from 45 patients with medically intractable DFI were included. The 16S rDNA PCR w…	Seoul National University (SNU); Seoul National University Hospital; Seoul National University (SNU); Seoul National University Hospital; Seoul National University (SNU); Seoul National University Hospital; Seoul National University (SNU); Seoul National University Hospital	44	AMER DIABETES ASSOC	ALEXANDRIA	DIABETES	2021	18	6.2	10.2337/db20-0907	15	Endocrinology & Metabolism	34162681	WOS:000671940300015
Metagenomic Diagnosis for a Culture-Negative Sample From a Patient With Severe Pneumonia by Nanopore and Next-Generation Sequencing	Wang, KY; Li, PH; Lin, YF; Chen, HB; Yang, L; Li, JH; Zhang, TY; Chen, QC; Li, ZH; Du, XY; Zhou, YS; Li, P; Wang, H; Song, HB	FRONTIERS IN CELLULAR AND INFECTION MICROBIOLOGY	English	Article	metagenomic next-generation sequencing (mNGS); nanopore sequencing; whole genome sequencing; clinical diagnosis; severe pneumonia	MEXAB-OPRM	Rapid and accurate etiologic diagnosis accelerates targeted antimicrobial therapy. Metagenomic analysis has played a critical role in pathogen identification. In this study, we leveraged the advantages of both the MinION and BGISEQ-500 platforms to make a bacteriologic diagnosis from a culture-negative lung tissue sample from an immunocompromised patient with severe pneumonia. Real-time nanopore …	Academy of Military Medical Sciences - China; Beijing Institute of Microbiology & Epidemiology; Peking University; Henan University of Technology; Nanchang Hangkong University	23	FRONTIERS MEDIA SA	LAUSANNE	FRONT CELL INFECT MI	2020	18	4.6	10.3389/fcimb.2020.00182	7	Immunology; Microbiology	32432051	WOS:000536191300001
Comprehensive Pathogen Identification, Antibiotic Resistance, and Virulence Genes Prediction Directly From Simulated Blood Samples and Positive Blood Cultures by Nanopore Metagenomic Sequencing	Zhou, ML; Wu, YR; Kudinha, T; Jia, PY; Wang, L; Xu, YC; Yang, QW	FRONTIERS IN GENETICS	English	Article	bloodstream infection; MinION nanopore sequencing; identification; resistance; virulence	BACTEREMIA; DIAGNOSIS; SEPSIS; IMPACT	Bloodstream infection is a major cause of morbidity and mortality worldwide. We explored whether MinION nanopore sequencing could accelerate diagnosis, resistance, and virulence profiling prediction in simulated blood samples and blood cultures. One milliliter of healthy blood samples each from direct spike (sample 1), anaerobic (sample 2), and aerobic (sample 3) blood cultures with initial inocu…	Chinese Academy of Medical Sciences - Peking Union Medical College; Peking Union Medical College Hospital; Peking Union Medical College; Charles Sturt University; Chinese Academy of Medical Sciences - Peking Union Medical College; Peking Union Medical College	44	FRONTIERS MEDIA SA	LAUSANNE	FRONT GENET	2021	18	2.8	10.3389/fgene.2021.620009	11	Genetics & Heredity	33841495	WOS:000637213900001
Preliminary assessment of nanopore-based metagenomic sequencing for the diagnosis of prosthetic joint infection	Wang, CX; Huang, ZD; Fang, W; Zhang, ZJ; Fang, XY; Li, WB; Yang, B; Chen, LY; Liang, XZ; Hu, H; Shi, DZ; Lee, S; Zhang, WM	INTERNATIONAL JOURNAL OF INFECTIOUS DISEASES	English	Article	Prosthetic joint infection; Metagenomic sequencing; Nanopore sequencing; Metagenomic next-generation sequencing	IDENTIFICATION; SONICATION; BIOFILM	Objectives: Pathogen identification is crucial for the diagnosis and management of periprosthetic joint infection (PJI). Although culturing methods are the foundation of pathogen detection in PJI, false-negative results often occur. Oxford nanopore sequencing (ONS) is a promising alternative for detecting pathogens and providing information on their antimicrobial resistance (AMR) profiles, withou…	Fujian Medical University; Fujian Medical University	26	ELSEVIER SCI LTD	OXFORD	INT J INFECT DIS	2020	18	4.8	10.1016/j.ijid.2020.05.044	6	Infectious Diseases	32439542	WOS:000552696000011
Dissemination of Klebsiella pneumoniae ST147 NDM-1 in Poland, 2015-19	Biedrzycka, M; Urbanowicz, P; Guzek, A; Brisse, S; Gniadkowski, M; Izdebski, R	JOURNAL OF ANTIMICROBIAL CHEMOTHERAPY	English	Article	/	COMPLETE NUCLEOTIDE-SEQUENCE; FIELD GEL-ELECTROPHORESIS; COLONIZING PATIENTS; PLASMID PKPQIL; ENTEROBACTERIACEAE; RESISTANCE; ACQUISITION; BLA(NDM-1); KPC-3	Objectives: To assess the spread of New Delhi metallo-beta-lactamase-1 (NDM-1)-producing Klebsiella pneumoniae ST147 organisms in Poland since an introduction from Tunisia in March 2015, including their phylogenetic position in the global population of the high-risk clone. Methods: Out of 8925 unique NDM-positive K. pneumoniae isolates identified in Poland from April 2015 till December 2019, 126 …	National Medicines Institute Lekow (NIL); Military Institute of Aviation Medicine; Pasteur Network; Universite Paris Cite; Institut Pasteur Paris	40	OXFORD UNIV PRESS	OXFORD	J ANTIMICROB CHEMOTH	2021	18	3.9	10.1093/jac/dkab207	8	Infectious Diseases; Microbiology; Pharmacology & Pharmacy	34164678	WOS:000701465700007
Clinical Metagenomic Sequencing for Species Identification and Antimicrobial Resistance Prediction in Orthopedic Device Infection	Street, TL; Sanderson, ND; Kolenda, C; Kavanagh, J; Pickford, H; Hoosdally, S; Cregan, J; Taunt, C; Jones, E; Oakley, S; Atkins, BL; Dudareva, M; McNally, MA; O'Grady, J; Crook, DW; Eyre, DW	JOURNAL OF CLINICAL MICROBIOLOGY	English	Article	orthopedic device infection; metagenomics; host depletion; antimicrobial resistance	PROSTHETIC-JOINT INFECTION; PATHOGEN DETECTION; ECONOMIC BURDEN; DIAGNOSIS; GENOME; SENSITIVITY; SONICATION; FLUID; DNA	Diagnosis of orthopedic device-related infection is challenging, and causative pathogens may be difficult to culture. Metagenomic sequencing can diagnose infections without culture, but attempts to detect antimicrobial resistance (AMR) determinants using metagenomic data have been less successful. Diagnosis of orthopedic device-related infection is challenging, and causative pathogens may be diff…	University of Oxford; University of Oxford; CHU Lyon; Oxford University Hospitals NHS Foundation Trust; University of Oxford; Oxford University Hospitals NHS Foundation Trust; UK Research & Innovation (UKRI); Biotechnology and Biological Sciences Research Council (BBSRC); Quadram Institute; University of Oxford	37	AMER SOC MICROBIOLOGY	WASHINGTON	J CLIN MICROBIOL	2022	18	6.1	10.1128/jcm.02156-21	11	Microbiology	35354286	WOS:000888568400026
Identification of plasmids by PCR based replicon typing in bacteremic Klebsiella pneumoniae	Shankar, C; Sethuvel, DPM; Neeravi, AR; Venkatesan, M; Ragupathi, NKD; Anandan, S; Veeraraghavan, B	MICROBIAL PATHOGENESIS	English	Article	K. pneumoniae; Plasmid typing; Inc; Carbapenemase; ColKP3; Hybrid assembly	TERTIARY CARE CENTER; BETA-LACTAMASES; MULTIPLEX PCR; GENES	Background: Klebsiella pneumoniae is a notorious pathogen with plasmid mediated resistance to all classes of antibiotics. It is important to determine the plasmid profile coding for resistance genes. Plasmid profile varies among geographical regions and tracking the types helps in determining the MDR and XDR K. pneumoniae spread especially in hospital setting. Aim of the present study was to dete…	Christian Medical College & Hospital (CMCH) Vellore	30	ACADEMIC PRESS LTD- ELSEVIER SCIENCE LTD	LONDON	MICROB PATHOGENESIS	2020	18	3.3	10.1016/j.micpath.2020.104429	8	Immunology; Microbiology	32781101	WOS:000592503800001
Rapid Acquisition of High-Quality SARS-CoV-2 Genome via Amplicon-Oxford Nanopore Sequencing	Yan, Y; Wu, K; Chen, J; Liu, HZ; Huang, Y; Zhang, Y; Xiong, J; Quan, WP; Wu, X; Liang, Y; He, KL; Jia, ZL; Wang, DP; Liu, D; Wei, HP; Chen, JJ	VIROLOGICA SINICA	English	Article	SARS-CoV-2; Genome; Amplicon; Nanopore sequencing	VIRUS	Genome sequencing has shown strong capabilities in the initial stages of the COVID-19 pandemic such as pathogen identification and virus preliminary tracing. While the rapid acquisition of SARS-CoV-2 genome from clinical specimens is limited by their low nucleic acid load and the complexity of the nucleic acid background. To address this issue, we modified and evaluated an approach by utilizing S…	Chinese Academy of Sciences; Wuhan Institute of Virology, CAS; Chinese Academy of Sciences; Wuhan Institute of Virology, CAS; Chinese Academy of Sciences; Wuhan Institute of Virology, CAS; Chinese Academy of Sciences; University of Chinese Academy of Sciences, CAS; Chinese Academy of Sciences; Chinese People's Liberation Army General Hospital; Xinjiang Medical University	34	KEAI PUBLISHING LTD	BEIJING	VIROL SIN	2021	18	4.3	10.1007/s12250-021-00378-8	12	Virology	33851337	WOS:000639722700001
Amplification of Femtograms of Bacterial DNA Within 3 h Using a Digital Microfluidics Platform for MinION Sequencing	Liu, YG; Jeraldo, P; Mendes-Soares, H; Masters, T; Asangba, AE; Nelson, H; Patel, R; Chia, N; Walther-Antonio, M	ACS OMEGA	English	Article	/	CLINICAL MICROBIOLOGY; CLASSIFICATION; DISPLACEMENT; SEPARATION	Whole genome sequencing is emerging as a promising tool for the untargeted detection of a broad range of microbial species for diagnosis and analysis. However, it is logistically challenging to perform the multistep process from sample preparation to DNA amplification to sequencing and analysis within a short turnaround time. To address this challenge, we developed a digital microfluidic device f…	Mayo Clinic; Mayo Clinic; Mayo Clinic; Mayo Clinic; Mayo Clinic; American College of Surgeons; Mayo Clinic; Mayo Clinic; Mayo Clinic	56	AMER CHEMICAL SOC	WASHINGTON	ACS OMEGA	2021	17	3.7	10.1021/acsomega.1c03683	10	Chemistry	34632220	WOS:000705955000051
Comparison of Illumina and Oxford Nanopore Technology for genome analysis of Francisella tularensis, Bacillus anthracis, and Brucella suis	Linde, J; Brangsch, H; Hölzer, M; Thomas, C; Elschner, MC; Melzer, F; Tomaso, H	BMC GENOMICS	English	Article	Illumina; Oxford nanopore technology; R10; Genome sequencing; Bacillus anthracis; Brucella; Francisella tularensis	VIRULENCE FACTORS; TOOL; PCR	BackgroundBacterial epidemiology needs to understand the spread and dissemination of strains in a One Health context. This is important for highly pathogenic bacteria such as Bacillus anthracis, Brucella species, and Francisella tularensis. Whole genome sequencing (WGS) has paved the way for genetic marker detection and high-resolution genotyping. While such tasks are established for Illumina sho…	Friedrich Loeffler Institute; Robert Koch Institute; Friedrich Schiller University of Jena	81	BMC	LONDON	BMC GENOMICS	2023	17	3.5	10.1186/s12864-023-09343-z	15	Biotechnology & Applied Microbiology; Genetics & Heredity	37173617	WOS:000988495500002
Nanopore sequencing and full genome de novo assembly of human cytomegalovirus TB40/E reveals clonal diversity and structural variations	Karamitros, T; van Wilgenburg, B; Wills, M; Klenerman, P; Magiorkinis, G	BMC GENOMICS	English	Article	Human cytomegalovirus; Nanopore; MinION; de novo assembly; Recombination; Mutation; Variable number tandem repeats; Quasi-species	CONGENITAL INFECTION; TANDEM REPEATS; REAL-TIME; IN-VITRO; VIRUS; POLYMORPHISMS; VARIABILITY; STRAINS; UL144; RECOMBINATION	Background: Human cytomegalovirus (HCMV) has a double-stranded DNA genome of approximately 235 Kbp that is structurally complex including extended GC-rich repeated regions. Genomic recombination events are frequent in HCMV cultures but have also been observed in vivo. Thus, the assembly of HCMV whole genomes from technologies producing shorter than 500 bp sequences is technically challenging. Her…	University of Oxford; University of Oxford; University of Cambridge; University of Oxford; National & Kapodistrian University of Athens	55	BMC	LONDON	BMC GENOMICS	2018	17	3.5	10.1186/s12864-018-4949-6	12	Biotechnology & Applied Microbiology; Genetics & Heredity	30068288	WOS:000440566500003
Nanopore Sequencing in a Clinical Routine Laboratory: Challenges and Opportunities	Schmidt, J; Blessing, F; Fimpler, L; Wenzel, F	CLINICAL LABORATORY	English	Article	nanopore sequencing; clinical routine laboratory; operating principle; sample preparation; data analysis; research examples; advantages; disadvantages	MINION	Background: About forty-five years ago the advent of Sanger sequencing (Sanger and Coulson 1975) was revolutionary as it allowed deciphering of complete genome sequences. A second revolution came when next-generation sequencing (NGS) technologies accelerated and cheapened genome sequencing. Recently, third generation/longread sequencing methods have appeared, which can directly detect epigenetic …	/	26	CLIN LAB PUBL	HEIDELBERG	CLIN LAB	2020	17	0.7	10.7754/Clin.Lab.2019.191114	8	Medical Laboratory Technology	32538066	WOS:000545457100020
Potential utility of targeted Nanopore sequencing for improving etiologic diagnosis of bacterial and fungal respiratory infection	Chan, WS; Au, CH; Leung, SM; Ho, DNN; Wong, EYL; To, MY; Ng, MK; Chan, TL; Ma, ESK; Tang, BSF	DIAGNOSTIC PATHOLOGY	English	Article	16S; Bacterial pathogen; Etiologic diagnosis; Fungal pathogen; ITS; Nanopore; Opportunistic infection; Pneumonia; Respiratory infection	COMMUNITY-ACQUIRED PNEUMONIA; THORACIC SOCIETY; AMPLIFICATION; GUIDELINE; DNA; PCR	Background Diversified etiology of lower respiratory tract infection renders diagnosis challenging. The mainstay microbial culture is time-consuming and constrained by variable growth requirements. In this study, we explored the use of Nanopore sequencing as a supplementary tool to alleviate this diagnostic bottleneck. Methods We developed a targeted Nanopore method based on amplification of bact…	/	19	BMC	LONDON	DIAGN PATHOL	2020	17	2.4	10.1186/s13000-020-00960-w	7	Pathology	32340617	WOS:000531186300001
Amplicon-Based, Next-Generation Sequencing Approaches to Characterize Single Nucleotide Polymorphisms of Orthohantavirus Species	Taylor, MK; Williams, EP; Wongsurawat, T; Jenjaroenpun, P; Nookaew, I; Jonsson, CB	FRONTIERS IN CELLULAR AND INFECTION MICROBIOLOGY	English	Article	hantavirus; Orthohantavirus; NGS; next generation sequencing; MinION; illumina MiSeq; single nucleotide polymorphism; SNP	HANTAVIRUS PULMONARY SYNDROME; HANTAAN-VIRUS; NUCLEOCAPSID PROTEIN; HEMORRHAGIC-FEVER; IDENTIFICATION; RNA; TRANSLATION; INFECTIONS; DIVERSITY; RESPONSES	Whole-genome sequencing (WGS) of viruses from patient or environmental samples can provide tremendous insight into the epidemiology, drug resistance or evolution of a virus. However, we face two common hurdles in obtaining robust sequence information; the low copy number of viral genomes in specimens and the error introduced by WGS techniques. To optimize detection and minimize error in WGS of ha…	University of Tennessee System; University of Tennessee Health Science Center; University of Arkansas System; University of Arkansas Medical Sciences	63	FRONTIERS MEDIA SA	LAUSANNE	FRONT CELL INFECT MI	2020	17	4.6	10.3389/fcimb.2020.565591	18	Immunology; Microbiology	33163416	WOS:000584518700001
Transmission Dynamics of Carbapenem-Resistant Klebsiella pneumoniae Sequence Type 11 Strains Carrying Capsular Loci KL64 and rmpA/rmpA2 Genes	Kong, YY; Sun, QY; Chen, HF; Draz, MS; Xie, XY; Zhang, J; Ruan, Z	FRONTIERS IN MICROBIOLOGY	English	Article	Klebsiella pneumoniae; carbapenem resistance; outbreak; whole-genome sequencing; single-nucleotide polymorphisms; genomic surveillance; hypervirulence plasmid	BETA-LACTAMASE; ANNOTATION	The presence and dissemination of carbapenem-resistant Klebsiella pneumoniae (CRKP) often cause life-threatening infections worldwide, but the therapeutic option is limited. In this study, whole-genome sequencing (WGS) was applied to assess the epidemiological characteristics and transmission dynamics of CRKP isolates recovered from two fetal outbreaks of nosocomial infections. Between April 2016…	Zhejiang University; University System of Ohio; Case Western Reserve University	41	FRONTIERS MEDIA SA	LAUSANNE	FRONT MICROBIOL	2021	17	4	10.3389/fmicb.2021.736896	12	Microbiology	34690977	WOS:000709959500001
MDR carbapenemase-producing Klebsiella pneumoniae of the hypervirulence-associated ST23 clone in Poland, 2009-19	Biedrzycka, M; Izdebski, R; Urbanowicz, P; Polanska, M; Hryniewicz, W; Gniadkowski, M; Literacka, E	JOURNAL OF ANTIMICROBIAL CHEMOTHERAPY	English	Article	/	LACTAMASE-PRODUCING ENTEROBACTERIACEAE; COMPLETE NUCLEOTIDE-SEQUENCE; LIVER-ABSCESS; PLASMID; RESISTANCE; DISSEMINATION; EMERGENCE; VIRULENCE; OUTBREAK; SPREAD	Objectives To characterize carbapenemase-producing isolates of the Klebsiella pneumoniae hypervirulent (hvKp) clone ST23 in Poland. Methods Fifteen K. pneumoniae ST23 isolates were identified by the Polish surveillance of carbapenemase-producing Enterobacterales. These comprised a cluster with KPC-2 + NDM-1 (n = 7), KPC-2 (n = 1) or NDM-1 (n = 1) enzymes from one hospital from 2018, and sporadic …	National Medicines Institute Lekow (NIL); University of Warsaw	78	OXFORD UNIV PRESS	OXFORD	J ANTIMICROB CHEMOTH	2022	17	3.9	10.1093/jac/dkac326	9	Infectious Diseases; Microbiology; Pharmacology & Pharmacy	36177793	WOS:000861848600001
Genome characterization of a Klebsiella pneumoniae co-producing OXA-181 and KPC-121 resistant to ceftazidime/avibactam, meropenem/vaborbactam, imipenem/relebactam and cefiderocol isolated from a critically ill patient	Gaibani, P; Amadesi, S; Lazzarotto, T; Ambretti, S	JOURNAL OF GLOBAL ANTIMICROBIAL RESISTANCE	English	Article	Cross-resistance; beta L-beta LICs; SNPs mutation; Co-production KPC; OXA-48	SPREAD	Objectives: : Carbapenemase-producing Enterobacterales (CPE) represent a public health concern. The limited antimicrobial options against CPE have led to the development of novel antimicrobial molecules. In the present study, we characterized the genetic determinants associated with the resistance to cef-tazidime/avibactam (CAZ-AVI), meropenem/vaborbactam (MER-VAB), imipenem/relebactam (IMI-REL) …	IRCCS Azienda Ospedaliero-Universitaria di Bologna; University of Bologna; IRCCS Azienda Ospedaliero-Universitaria di Bologna	7	ELSEVIER SCI LTD	OXFORD	J GLOB ANTIMICROB RE	2022	17	3.7	10.1016/j.jgar.2022.06.021	3	Infectious Diseases; Pharmacology & Pharmacy	35777673	WOS:000836951100006
Genomic epidemiology of Escherichia coli isolates from a tertiary referral center in Lilongwe, Malawi	Tegha, G; Ciccone, EJ; Krysiak, R; Kaphatika, J; Chikaonda, T; Ndhlovu, I; van Duin, D; Hoffman, I; Juliano, JJ; Wang, J	MICROBIAL GENOMICS	English	Article	Escherichia coli; molecular epidemiology; whole genome sequencing; antimicrobial resistance; Africa; Malawi	HIGH PREVALENCE; RESISTANCE; IDENTIFICATION; EVOLUTION; VIRULENCE; CTX-M-15; ISS	Antimicrobial resistance (AMR) is a global threat, including in subSaharan Africa. However, little is known about the genetics of resistant bacteria in the region. In Malawi, there is growing concern about increasing rates of antimicrobial resistance to most empirically used antimicrobials. The highly drug resistant Escherichia coli sequence type (ST) 131, which is associated with the extended sp…	University of North Carolina; University of North Carolina Chapel Hill; University of North Carolina School of Medicine; University of North Carolina; University of North Carolina Chapel Hill; University of North Carolina School of Medicine; University of North Carolina; University of North Carolina Chapel Hill; University of North Carolina School of Medicine; University of North Carolina; Univer…	55	MICROBIOLOGY SOC	LONDON	MICROB GENOMICS	2021	17	4	10.1099/mgen.0.000490	12	Genetics & Heredity; Microbiology	33295867	WOS:000617887500003
Using nanopore sequencing to identify fungi from clinical samples with high phylogenetic resolution	Ohta, A; Nishi, K; Hirota, K; Matsuo, Y	SCIENTIFIC REPORTS	English	Article	/	/	The study of microbiota has been revolutionized by the development of DNA metabarcoding. This sequence-based approach enables the direct detection of microorganisms without the need for culture and isolation, which significantly reduces analysis time and offers more comprehensive taxonomic profiles across broad phylogenetic lineages. While there has been an accumulating number of researches on ba…	Kansai Medical University; Osaka Red Cross Hospital	47	NATURE PORTFOLIO	BERLIN	SCI REP-UK	2023	17	3.8	10.1038/s41598-023-37016-0	13	Science & Technology - Other Topics	37328565	WOS:001044376300066
Evaluation on the use of Nanopore sequencing for direct characterization of coronaviruses from respiratory specimens, and a study on emerging missense mutations in partial RdRP gene of SARS-CoV-2	Chan, WS; Au, CH; Lam, HY; Wang, CLN; Ho, DNY; Lam, YM; Chu, DKW; Poon, LLM; Chan, TL; Zee, JST; Ma, ESK; Tang, BSF	VIROLOGY JOURNAL	English	Article	Coronavirus; COVID-19; Flongle; MinION; Missense mutation; Nanopore; RdRP; SARS-CoV-2	/	Coronavirus disease 2019 (COVID-19) pandemic has been a catastrophic burden to global healthcare systems. The fast spread of the etiologic agent, severe acute respiratory syndrome coronavirus 2 (SARS-CoV-2), highlights the need to identify unknown coronaviruses rapidly for prompt clinical and public health decision making. Moreover, owing to the high mutation rate of RNA viruses, periodic surveil…	University of Hong Kong	16	BMC	LONDON	VIROL J	2020	17	4	10.1186/s12985-020-01454-3	13	Virology	33225958	WOS:000595833600001
Validation and Application of Long-Read Whole-Genome Sequencing for Antimicrobial Resistance Gene Detection and Antimicrobial Susceptibility Testing	Weinmaier, T; Conzemius, R; Bergman, Y; Lewis, S; Jacobs, EB; Tamma, PD; Materna, A; Weinberger, J; Beisken, S; Simner, PJ	ANTIMICROBIAL AGENTS AND CHEMOTHERAPY	English	Article	ONT; WGS; WGS-AST; antibiotic resistance; antimicrobial resistance; antimicrobial susceptibility testing; nanopore sequencing; whole-genome sequencing	/	Next-generation sequencing applications are increasingly used for detection and characterization of antimicrobial-resistant pathogens in clinical settings. Oxford Nanopore Technologies (ONT) sequencing offers advantages for clinical use compared with other sequencing methodologies because it enables real-time basecalling, produces long sequencing reads that increase the ability to correctly assem…	Johns Hopkins University; Johns Hopkins University	45	AMER SOC MICROBIOLOGY	WASHINGTON	ANTIMICROB AGENTS CH	2023	16	4.1	10.1128/aac.01072-22	11	Microbiology; Pharmacology & Pharmacy	36533931	WOS:000899753400001
Genomic characterization of Citrobacter freundii strains coproducing OXA-48 and VIM-1 carbapenemase enzymes isolated in leukemic patient in Spain	Lalaoui, R; Djukovic, A; Bakour, S; Hadjadj, L; Sanz, J; Salavert, M; López-Hontangas, JL; Sanz, MA; Ubeda, C; Rolain, JM	ANTIMICROBIAL RESISTANCE AND INFECTION CONTROL	English	Article	Citrobacter freundii; OXA-48; VIM-1; Carbapenemase; Whole genome sequencing	ANTIBIOTIC-RESISTANCE; PSEUDOMONAS-AERUGINOSA; ENTEROBACTERIACEAE; IDENTIFICATION; EMERGENCE	Background: The emergence of carbapenemase-producing (CP) Citrobacter freundii poses a significant threat to public health, especially in high-risk populations. In this study, whole genome sequencing was used to characterize the carbapenem resistance mechanism of three C. freundii clinical isolates recovered from fecal samples of patients with acute leukemia (AL) from Spain. Materials and methods…	Institut de Recherche pour le Developpement (IRD); Aix-Marseille Universite; Assistance Publique-Hopitaux de Marseille; University of Valencia; Hospital Universitari i Politecnic La Fe; CIBER - Centro de Investigacion Biomedica en Red; CIBERONC; Hospital Universitari i Politecnic La Fe; CIBER - Centro de Investigacion Biomedica en Red; CIBERESP	29	BMC	LONDON	ANTIMICROB RESIST IN	2019	16	4.8	10.1186/s13756-019-0630-3	6	Public, Environmental & Occupational Health; Infectious Diseases; Microbiology; Pharmacology & Pharmacy	31687131	WOS:000500772900003
Next-generation sequencing for cytomegalovirus antiviral resistance genotyping in a clinical virology laboratory	Chorlton, SD; Ritchie, G; Lawson, T; McLachlan, E; Romney, MG; Matic, N; Lowe, CF	ANTIVIRAL RESEARCH	English	Article	CMV; UL97; UL54; Sequencing	RAPID DETECTION; UL97; MUTATIONS; GANCICLOVIR; MUTANTS; DNA	Introduction: The identification of CMV antiviral drug resistance (AVDR) is a critical diagnostic test for immuno-compromised patients with CMV infection and a failure of virologic response on optimal antiviral treatment. We developed a next-generation sequencing (NGS) assay for CMV AVDR testing and compared the AVDR mutations identified by NGS to Sanger sequencing. Methods: Retrospective review …	University of British Columbia; St. Paul's Hospital; Public Health Agency of Canada	26	ELSEVIER	AMSTERDAM	ANTIVIR RES	2021	16	4.5	10.1016/j.antiviral.2021.105123	5	Pharmacology & Pharmacy; Virology	34174249	WOS:000672095900001
Application of Nanopore Sequencing Technology in the Clinical Diagnosis of Infectious Diseases	Zhang, LL; Zhang, C; Peng, JP	BIOMEDICAL AND ENVIRONMENTAL SCIENCES	English	Review	Nanopore sequencing; Infectious diseases; Pathogen; Oxford Nanopore Technologies	MULTIPLEX PCR; REAL-TIME; ANTIMICROBIAL RESISTANCE; GENOME; EVOLUTION; MICROBIOME; SARS-COV-2; HEALTH; GENES; WORLD	Infectious diseases are an enormous public health burden and a growing threat to human health worldwide. Emerging or classic recurrent pathogens, or pathogens with resistant traits, challenge our ability to diagnose and control infectious diseases. Nanopore sequencing technology has the potential to enhance our ability to diagnose, interrogate, and track infectious diseases due to the unrestricte…	Chinese Academy of Medical Sciences - Peking Union Medical College; Peking Union Medical College; Institute of Pathogen Biology - CAMS; Chinese Academy of Medical Sciences - Peking Union Medical College	122	CHINESE CENTER DISEASE CONTROL & PREVENTION	BEIJING	BIOMED ENVIRON SCI	2022	16	3	10.3967/bes2022.054	12	Environmental Sciences & Ecology; Public, Environmental & Occupational Health	35676809	WOS:000810356900001
Comparison of Third-Generation Sequencing Technology and Traditional Microbiological Detection in Pathogen Diagnosis of Lower Respiratory Tract Infection	Luo, W; He, YB; Xu, JH; Zhang, SH; Li, CX; Lv, JF; Shen, YF; Ou, Z; Dong, HM	DISCOVERY MEDICINE	English	Article	nanopore sequencing technology; lower respiratory tract infection; pathogen diagnosis; clinical application		Background: It is common to obtain a low detection rate and unsatisfactory detection results in complex infection or rare pathogen detection. This retrospective study aimed to illustrate the application value and prospect of the third-generation se-quencing technology in lower respiratory tract infection disease. Methods: This study recruited 70 patients with lower respiratory tract infection (LR…	Southern Medical University - China; Southern Medical University - China	24	DISCOVERY MEDICINE	TIMONIUM	DISCOV MED	2023	16	2	10.24976/Discov.Med.202335176.34	11	Research & Experimental Medicine	37272100	WOS:001013311500004
Genomic Sequencing and Analysis of a Novel Human Cowpox Virus With Mosaic Sequences From North America and Old World Orthopoxvirus	Diaz-Canova, D; Moens, UL; Brinkmann, A; Nitsche, A; Okeke, MI	FRONTIERS IN MICROBIOLOGY	English	Article	poxvirus; phylogenetics; Fennoscandian; Norway; recombination	A-TYPE INCLUSION; ECTROMELIA VIRUS; INFECTION; PROTEIN; GENE; RECOMBINATION; EVOLUTION; OUTBREAK; IDENTIFICATION; EMERGENCE	Orthopoxviruses (OPXVs) not only infect their natural hosts, but some OPXVs can also cause disease in humans. Previously, we partially characterized an OPXV isolated from an 18-year-old male living in Northern Norway. Restriction enzyme analysis and partial genome sequencing characterized this virus as an atypical cowpox virus (CPXV), which we named CPXV-No-H2. In this study, we determined the co…	UiT The Arctic University of Tromso; Robert Koch Institute; American University of Nigeria; Robert Koch Institute	87	FRONTIERS MEDIA SA	LAUSANNE	FRONT MICROBIOL	2022	16	4	10.3389/fmicb.2022.868887	14	Microbiology	35592007	WOS:000797005100001
Coexistence of Two blaNDM-5 Genes Carried on IncX3 and IncFII Plasmids in an Escherichia coli Isolate Revealed by Illumina and Nanopore Sequencing	Yang, L; Lin, YF; Lu, LF; Xue, M; Ma, H; Guo, XG; Wang, KY; Li, PH; Du, XY; Qi, KZ; Li, P; Song, HB	FRONTIERS IN MICROBIOLOGY	English	Article	coexistence of two bla(NDM-)(5) genes; Escherichia coli; transferability; Illumina short-read sequencing; MinION long-read sequencing	METALLO-BETA-LACTAMASE; KLEBSIELLA-PNEUMONIAE; CARRYING BLA(NDM-5); VARIANT; COPIES	The emergence of carbapenem-resistant Enterobacteriaceae poses a significant threat to public health worldwide. Here, we reported a multidrug-resistant Escherichia coli strain with two different bla(NDM-)(5)-carrying plasmids from China. Illumina short-read and MinION long-read whole genome sequencing were performed. Genomic analysis found that one bla(NDM-)(5) gene together with mphA was located…	Academy of Military Medical Sciences - China; Chinese Center for Disease Control & Prevention; Sun Yat Sen University; Anhui Agricultural University; Chinese People's Liberation Army General Hospital; Guangzhou Medical University	31	FRONTIERS MEDIA SA	LAUSANNE	FRONT MICROBIOL	2020	16	4	10.3389/fmicb.2020.00195	7	Microbiology	32117184	WOS:000517507300001
Microbial diagnosis of endophthalmitis using nanopore amplicon sequencing	Jun, KI; Oh, BL; Kim, N; Shin, JY; Moon, J	INTERNATIONAL JOURNAL OF MEDICAL MICROBIOLOGY	English	Article	Endophthalmitis; Nanopore sequencing; Amplicon sequencing; 16S rDNA; ITS1 rDNA	AQUEOUS-HUMOR; IDENTIFICATION; METAGENOMICS; MINION	Objectives: We investigated whether nanopore amplicon sequencing of aqueous humor was capable of rapid pathogen identification in infectious endophthalmitis. Methods: 5 cases of culture-positive bacterial endophthalmitis and 3 cases of fungal endophthalmitis (1 culture-positive and 2 presumed) were included. DNA was extracted from the aqueous humor and vitreous specimen, and PCR of bacterial rDNA…	Ewha Womans University; Seoul National University (SNU); Seoul National University Hospital; Seoul National University (SNU); Seoul National University Hospital; Seoul National University (SNU); Seoul National University Hospital; Seoul National University (SNU); Seoul National University Hospital	41	ELSEVIER GMBH	MUNICH	INT J MED MICROBIOL	2021	16	4.5	10.1016/j.ijmm.2021.151505	7	Microbiology; Virology	33930723	WOS:000656123700006
Accessory genome of the multi-drug resistant ocular isolate of Pseudomonas aeruginosa PA34	Subedi, D; Kohli, GS; Vijay, AK; Willcox, M; Rice, SA	PLOS ONE	English	Article	/	SITE-SPECIFIC RECOMBINATION; HEAVY-METAL RESISTANCE; ANTIMICROBIAL RESISTANCE; VIRULENCE; SEQUENCE; GENES; CYTOTOXICITY; EXPRESSION; PROTEIN; ACQUISITION	Bacteria can acquire an accessory genome through the horizontal transfer of genetic elements from non-parental lineages. This leads to rapid genetic evolution allowing traits such as antibiotic resistance and virulence to spread through bacterial communities. The study of complete genomes of bacterial strains helps to understand the genomic traits associated with virulence and antibiotic resistan…	University of New South Wales Sydney; Nanyang Technological University; Nanyang Technological University; University of Technology Sydney	78	PUBLIC LIBRARY SCIENCE	SAN FRANCISCO	PLOS ONE	2019	16	2.9	10.1371/journal.pone.0215038	20	Science & Technology - Other Topics	30986237	WOS:000464503800015
DNA extraction of microbial DNA directly from infected tissue: an optimized protocol for use in nanopore sequencing	Helmersen, K; Aamot, HV	SCIENTIFIC REPORTS	English	Article	/	/	Identification of bacteria causing tissue infections can be comprehensive and, in the cases of non- or slow-growing bacteria, near impossible with conventional methods. Performing shotgun metagenomic sequencing on bacterial DNA extracted directly from the infected tissue may improve time to diagnosis and targeted treatment considerably. However, infected tissue consists mainly of human DNA (hDNA)…	University of Oslo; University of Oslo; University of Oslo	20	NATURE PORTFOLIO	BERLIN	SCI REP-UK	2020	16	3.8	10.1038/s41598-020-59957-6	7	Science & Technology - Other Topics	32076089	WOS:000560381100006
Multiple Early Introductions of SARS-CoV-2 to Cape Town, South Africa	Engelbrecht, S; Delaney, K; Kleinhans, B; Wilkinson, E; Tegally, H; Stander, T; van Zyl, G; Preiser, W; de Oliveira, T	VIRUSES-BASEL	English	Article	betacoronavirus; SARS-CoV-2; COVID-19; genome sequencing; mutation; phylogenetics; Cape Town; Western Cape Province; South Africa; molecular epidemiology	EMERGENCE; IDENTIFICATION; CORONAVIRUS; GENOMICS; VIRUS	Cape Town was the first city in South Africa to experience the full impact of the coronavirus disease 2019 (COVID-19) pandemic. We acquired samples from all suspected cases and their contacts during the first month of the pandemic from Tygerberg Hospital. Nanopore sequencing generated SARS-CoV-2 whole genomes. Phylogenetic inference with maximum likelihood and Bayesian methods were used to determ…	Stellenbosch University; University of Kwazulu Natal; University of Washington; University of Washington Seattle	34	MDPI	BASEL	VIRUSES-BASEL	2021	16	3.8	10.3390/v13030526	11	Virology	33810168	WOS:000634211800001
Deep Metagenomic Sequencing for Endophthalmitis Pathogen Detection Using a Platform	Low, L; Nakamichi, K; Akileswaran, L; Lee, CS; Lee, AY; Moussa, G; Murray, PI; Wallace, GR; Van Gelder, RN; Rauz, S	AMERICAN JOURNAL OF OPHTHALMOLOGY	English	Article	/	CATARACT-SURGERY; IDENTIFICATION; DIAGNOSIS; BACTERIA; CULTURE; GENOME; VIRUS	PURPOSE: To evaluate the utility of nanopore sequencing for identifying potential causative pathogens in endophthalmitis, comparing culture results against full-length 16S rRNA nanopore sequencing (16S Nanopore), whole genome nanopore sequencing (Nanopore WGS), and Illumina (Illumina WGS). DESIGN: Cross-sectional diagnostic comparison. METHODS: Patients with clinically suspected endophthalmitis u…	University of Birmingham; University of Washington; University of Washington Seattle; University of Washington; University of Washington Seattle	49	ELSEVIER SCIENCE INC	NEW YORK	AM J OPHTHALMOL	2022	15	4.1	10.1016/j.ajo.2022.05.022	9	Ophthalmology	35660421	WOS:000849631800001
Oxford Nanopore MinION Sequencing Enables Rapid Whole Genome Assembly of Rickettsia typhi in a Resource-Limited Setting	Elliott, I; Batty, EM; Ming, DM; Robinson, MT; Nawtaisong, P; de Cesare, M; Newton, PN; Bowden, R	AMERICAN JOURNAL OF TROPICAL MEDICINE AND HYGIENE	English	Article	/	MURINE TYPHUS; REAL-TIME; EPIDEMIOLOGY; INFECTIONS; PATHOGENS; ORIENTIA; FEVER	The infrastructure challenges and costs of next-generation sequencing have been largely overcome, for many sequencing applications, by Oxford Nanopore Technologies' portable MinION sequencer. However, the question remains open whether MinION-based bacterial whole genome sequencing is by itself sufficient for the accurate assessment of phylogenetic and epidemiological relationships between isolate…	University of Oxford; University of Oxford; Wellcome Centre for Human Genetics; Mahidol Oxford Tropical Medicine Research Unit (MORU); Mahidol University	49	AMER SOC TROP MED & HYGIENE	MCLEAN	AM J TROP MED HYG	2020	15	1.9	10.4269/ajtmh.19-0383	7	Public, Environmental & Occupational Health; Tropical Medicine	31820709	WOS:000512881500033
Genomic Analysis of a Strain Collection Containing Multidrug-, Extensively Drug-, Pandrug-, and Carbapenem-Resistant Modern Clinical Isolates of Acinetobacter baumannii	Valcek, A; Nesporova, K; Whiteway, C; De Pooter, T; De Coster, W; Strazisar, M; Van der Henst, C	ANTIMICROBIAL AGENTS AND CHEMOTHERAPY	English	Article	Acinetobacter baumannii; bacteriology; microbiology; plasmids; wholegenome sequencing; antibiotic resistances	EMERGENCE; IDENTIFICATION; OUTBREAK; SPREAD	In this study, we characterize a new collection that comprises multidrug-resistant (MDR), extensively drug-resistant (XDR), pandrug-resistant (PDR), and carbapenem-resistant modern clinical isolates of Acinetobacter baumannii collected from hospitals through national microbiological surveillance in Belgium. Bacterial isolates (n = 43) were subjected to whole-genome sequencing (WGS), combining Ill…	Flanders Institute for Biotechnology (VIB); Vrije Universiteit Brussel; Flanders Institute for Biotechnology (VIB); University of Antwerp; Flanders Institute for Biotechnology (VIB); University of Antwerp	44	AMER SOC MICROBIOLOGY	WASHINGTON	ANTIMICROB AGENTS CH	2022	15	4.1	10.1128/aac.00892-22	13	Microbiology; Pharmacology & Pharmacy	35969073	WOS:000840639600001
Characterization of Two Multidrug-Resistant IncA/C Plasmids from the 1960s by Using the MinION Sequencer Device	Szabó, M; Nagy, T; Wilk, T; Farkas, T; Hegyi, A; Olasz, F; Kiss, J	ANTIMICROBIAL AGENTS AND CHEMOTHERAPY	English	Article	/	COMPLETE NUCLEOTIDE-SEQUENCE; ANTIMICROBIAL RESISTANCE; NANOPORE SEQUENCER; BACTERIAL; ELEMENT; GENOME; GENES; IDENTIFICATION; STREPTOMYCIN; SALMONELLA	Two A/C incompatibility group (IncA/C family) plasmids from the 1960s have been sequenced and classified into the A/C2 type 1 group. R16a and IP40a contain novel antibiotic resistance islands and a complete GIsul2 genomic island not previously found in the family. In the 173.1-kb R16a, the 29.9-kb antibiotic resistance island (ARI) is located in a unique backbone position not utilized by ARIs. AR…	/	43	AMER SOC MICROBIOLOGY	WASHINGTON	ANTIMICROB AGENTS CH	2016	15	4.1	10.1128/AAC.01121-16	7	Microbiology; Pharmacology & Pharmacy	27600047	WOS:000389063500039
Metagenomic diagnosis of severe psittacosis using multiple sequencing platforms	Wang, KY; Liu, X; Liu, HY; Li, PH; Lin, YF; Yin, DD; Yang, L; Li, JH; Li, SL; Jia, LL; Bai, CQ; Jiang, YQ; Li, P; Song, HB	BMC GENOMICS	English	Article	Metagenomic Sequencing; Chlamydia psittaci; Severe Pneumonia; Pathogen Identification	CHLAMYDOPHILA-PSITTACI; INFECTIONS; ALIGNMENT; GENOME	BackgroundChlamydia psittaci is an avian pathogen that can cause lethal human infections. Diagnosis of C. psittaci pneumonia is often delayed due to nonspecific clinical presentations and limited laboratory diagnostic techniques.ResultsThe MinION platform established the diagnosis in the shortest time, while BGISEQ-500 generated additional in-depth sequence data that included the rapid characteri…	Academy of Military Medical Sciences - China; Chinese People's Liberation Army General Hospital; Anhui Agricultural University	25	BMC	LONDON	BMC GENOMICS	2021	15	3.5	10.1186/s12864-021-07725-9	6	Biotechnology & Applied Microbiology; Genetics & Heredity	34078288	WOS:000660858100001
Genomic surveillance of antimicrobial resistant bacterial colonisation and infection in intensive care patients	Wyres, KL; Hawkey, J; Mirceta, M; Judd, LM; Wick, RR; Gorrie, CL; Pratt, NF; Garlick, JS; Watson, KM; Pilcher, DV; McGloughlin, SA; Abbott, IJ; Macesic, N; Spelman, DW; Jenney, AWJ; Holt, KE	BMC INFECTIOUS DISEASES	English	Article	Antimicrobial resistance (AMR); Colonisation; Transmission; Genomic surveillance; Intensive care	KLEBSIELLA-PNEUMONIAE; ENTEROBACTERIACEAE	Background Third-generation cephalosporin-resistant Gram-negatives (3GCR-GN) and vancomycin-resistant enterococci (VRE) are common causes of multi-drug resistant healthcare-associated infections, for which gut colonisation is considered a prerequisite. However, there remains a key knowledge gap about colonisation and infection dynamics in high-risk settings such as the intensive care unit (ICU), …	Monash University; Alfred Health; University of Melbourne; Florey Institute of Neuroscience & Mental Health; Howard Florey Institute Affiliates; Florey Institute of Neuroscience & Mental Health; Howard Florey Institute Affiliates; Monash University; Florey Institute of Neuroscience & Mental Health; Howard Florey Institute Affiliates; University of London; London School of Hygiene & Tropical Medic…	46	BMC	LONDON	BMC INFECT DIS	2021	15	3.4	10.1186/s12879-021-06386-z	11	Infectious Diseases	34261450	WOS:000675299400002
Rapid and Accurate Species Identification of Mitis Group Streptococci Using the MinION Nanopore Sequencer	Imai, K; Nemoto, R; Kodana, M; Tarumoto, N; Sakai, J; Kawamura, T; Ikebuchi, K; Mitsutake, K; Murakami, T; Maesaki, S; Fujiwara, T; Hayakawa, S; Hoshino, T; Seki, M; Maeda, T	FRONTIERS IN CELLULAR AND INFECTION MICROBIOLOGY	English	Article	mitis group streptococci; MinION; WIMP; Kraken; whole genome sequencing	ALPHA-HEMOLYTIC STREPTOCOCCI; DESORPTION IONIZATION-TIME; MALDI BIOTYPER; GENE; PNEUMONIAE; LYTA; DIAGNOSIS; NOV.	Differentiation between mitis group streptococci (MGS) bacteria in routine laboratory tests has become important for obtaining accurate epidemiological information on the characteristics of MGS and understanding their clinical significance. The most reliable method of MGS species identification is multilocus sequence analysis (MLSA) with seven house-keeping genes; however, because this method is …	Saitama Medical University; Saitama Medical University; Saitama Medical University; Saitama Medical University; Saitama Medical University; Nagasaki University; Nihon University; Meikai University	36	FRONTIERS MEDIA SA	LAUSANNE	FRONT CELL INFECT MI	2020	15	4.6	10.3389/fcimb.2020.00011	11	Immunology; Microbiology	32083020	WOS:000514626600001
Long-Reads-Based Metagenomics in Clinical Diagnosis With a Special Focus on Fungal Infections	Hoang, MTV; Irinyi, L; Hu, YH; Schwessinger, B; Meyer, W	FRONTIERS IN MICROBIOLOGY	English	Review	pathogenic fungi; long-read sequencing; metagenomics; identification; diagnosis; mycoses	DESORPTION IONIZATION-TIME; FLIGHT MASS-SPECTROMETRY; RAPID IDENTIFICATION; MOLECULAR-IDENTIFICATION; GENOME SEQUENCE; PCR ASSAY; DNA; VIRUS; CANDIDA; COMMUNITIES	Identification of the causative infectious agent is essential in the management of infectious diseases, with the ideal diagnostic method being rapid, accurate, and informative, while remaining cost-effective. Traditional diagnostic techniques rely on culturing and cell propagation to isolate and identify the causative pathogen. These techniques are limited by the ability and the time required to …	University of Sydney; University of Sydney; Westmead Institute for Medical Research; University of Sydney; Australian National University; University of Sydney; NSW Health; Westmead Hospital	204	FRONTIERS MEDIA SA	LAUSANNE	FRONT MICROBIOL	2022	15	4	10.3389/fmicb.2021.708550	20	Microbiology	35069461	WOS:000745842700001
Characterising Foot-and-Mouth Disease Virus in Clinical Samples Using Nanopore Sequencing	Brown, E; Freimanis, G; Shaw, AE; Horton, DL; Gubbins, S; King, D	FRONTIERS IN VETERINARY SCIENCE	English	Article	foot-and-mouth disease; MinION; nanopore sequencing; characterisation; consensus accuracy	CAPSID-CODING REGION; REAL-TIME; MOLECULAR EPIDEMIOLOGY; RT-PCR; MINION; ZIKA	The sequencing of viral genomes provides important data for the prevention and control of foot-and-mouth disease (FMD) outbreaks. Sequence data can be used for strain identification, outbreak tracing, and aiding the selection of the most appropriate vaccine for the circulating strains. At present, sequencing of FMD virus (FMDV) relies upon the time-consuming transport of samples to well-resourced…	UK Research & Innovation (UKRI); Biotechnology and Biological Sciences Research Council (BBSRC); Pirbright Institute; University of Surrey; UK Research & Innovation (UKRI); Biotechnology and Biological Sciences Research Council (BBSRC); Pirbright Institute; UK Research & Innovation (UKRI); Biotechnology and Biological Sciences Research Council (BBSRC); Pirbright Institute; University of Surrey	43	FRONTIERS MEDIA SA	LAUSANNE	FRONT VET SCI	2021	15	2.6	10.3389/fvets.2021.656256	10	Veterinary Sciences	34079833	WOS:000656048300001
Characterization of a small plasmid carrying the carbapenem resistance gene blaOXA-72 from community-acquired Acinetobacter baumannii sequence type 880 in China	Jia, HQ; Sun, QY; Ruan, Z; Xie, XY	INFECTION AND DRUG RESISTANCE	English	Article	Acinetobacter baumannii; community-acquired pneumonia; bla(OXA-72); carbapenem resistance; plasmid	OXA-72 CARBAPENEMASE; PNEUMONIA; IDENTIFICATION; EMERGENCE; SPREAD	Background: Acinetobacter baumannii has emerged as an important pathogen associated with hospital- and community-acquired infections. Community-acquired A. baumannii pneumonia is characterized by a fulminant course and high mortality rates. In this study, we report the identification of a community-acquired carbapenem-resistant A. baumannii strain carrying the bla(OXA-72) gene. Methods: This A. b…	Zhejiang University	27	DOVE MEDICAL PRESS LTD	ALBANY	INFECT DRUG RESIST	2019	15	2.9	10.2147/IDR.S202803	9	Infectious Diseases; Pharmacology & Pharmacy	31239730	WOS:000472751300001
Characterization of Fecal Microbiota with Clinical Specimen Using Long-Read and Short-Read Sequencing Platform	Wei, PL; Hung, CS; Kao, YW; Lin, YC; Lee, CY; Chang, TH; Shia, B; Lin, JC	INTERNATIONAL JOURNAL OF MOLECULAR SCIENCES	English	Article	16S rRNA; gut microbiota; MinION; MiSeq	/	Accurate and rapid identification of microbiotic communities using 16S ribosomal (r)RNA sequencing is a critical task for expanding medical and clinical applications. Next-generation sequencing (NGS) is widely considered a practical approach for direct application to communities without the need for in vitro culturing. In this report, a comparative evaluation of short-read (Illumina) and long-rea…	Taipei Medical University; Taipei Medical University Hospital; Taipei Medical University Hospital; Taipei Medical University; Taipei Medical University Hospital; Taipei Medical University; Taipei Medical University; Taipei Medical University; Taipei Medical University; Taipei Medical University; Taipei Municipal WanFang Hospital; Fu Jen Catholic University; Taipei Medical University; Taipei Munic…	24	MDPI	BASEL	INT J MOL SCI	2020	15	4.9	10.3390/ijms21197110	12	Biochemistry & Molecular Biology; Chemistry	32993155	WOS:000587183300001
Genomic background of the Klebsiella pneumoniae NDM-1 outbreak in Poland, 2012-18	Izdebski, R; Sitkiewicz, M; Urbanowicz, P; Krawczyk, M; Brisse, S; Gniadkowski, M	JOURNAL OF ANTIMICROBIAL CHEMOTHERAPY	English	Article	/	ANTIMICROBIAL RESISTANCE; ENTEROBACTERIACEAE; PLASMIDS	Objectives: To characterize genomes of Klebsiella pneumoniae ST11 NDM-1 responsible for a countrywide outbreak in Poland and compare them phylogenetically with other Polish and international ST11 strains. Methods: Seventy-one carbapenemase-producing K. pneumoniae ST11 isolates from Poland, including 66 representatives of the NDM-1 epidemic from 2012-18, were sequenced using Illumina MiSeq. Additi…	National Medicines Institute Lekow (NIL); National Medicines Institute Lekow (NIL); Pasteur Network; Universite Paris Cite; Institut Pasteur Paris	25	OXFORD UNIV PRESS	OXFORD	J ANTIMICROB CHEMOTH	2020	15	3.9	10.1093/jac/dkaa339	7	Infectious Diseases; Microbiology; Pharmacology & Pharmacy	32790858	WOS:000593065400011
A hybrid plasmid formed by recombination of a virulence plasmid and a resistance plasmid in Klebsiella pneumoniae	Xie, MM; Dong, N; Chen, KC; Yang, XM; Ye, LW; Chan, EWC; Zhang, R; Chen, S	JOURNAL OF GLOBAL ANTIMICROBIAL RESISTANCE	English	Article	Klebsiella pneumoniae; multidrug resistance; plasmid; recombination	HYPERVIRULENT; STRAINS; INFECTIONS; EMERGENCE	Objective: The emergence of multidrug-resistant (MDR) and hypervirulent Klebsiella pneumoniae (hvKP) facilitates simultaneous dissemination of virulence and resistance in a single event, which poses serious threat to public health. Methods: This study characterized the multidrug-resistant and moderately virulent ST11 K64 K. pneumoniae strain HB25-1 from a clinical case with microbiological and ge…	City University of Hong Kong; Hong Kong Polytechnic University; Zhejiang University	32	ELSEVIER SCI LTD	OXFORD	J GLOB ANTIMICROB RE	2020	15	3.7	10.1016/j.jgar.2020.10.018	5	Infectious Diseases; Pharmacology & Pharmacy	33212284	WOS:000604953100030
Development and evaluation of a nanopore 16S rRNA gene sequencing service for same day targeted treatment of bacterial respiratory infection in the intensive care unit	Baldan, R; Cliff, PR; Burns, S; Medina, A; Smith, GC; Batra, R; Cerda, A; Wilson, R; Merrill, T; Lewis, SJ; Patel, A; Jeyaratnam, D; Wyncoll, DL; Barrett, N; Chand, MA; Edgeworth, JD	JOURNAL OF INFECTION	English	Article	16S rRNA; Nanopore flongle; LRTI; Bacterial infections; Rapid diagnostics	PCR	Objectives: Assess the feasibility and impact of nanopore-based 16S rRNA gene sequencing (Np16S) service on antibiotic treatment for acute severe pneumonia on the intensive care unit (ICU). Methods: Speciation and sequencing accuracy of Np16S on isolates with bioinformatics pipeline optimisation, followed by technical evaluation including quality checks and clinical-reporting criteria analysing s…	University of London; King's College London; Guy's & St Thomas' NHS Foundation Trust; Guy's & St Thomas' NHS Foundation Trust; Guy's & St Thomas' NHS Foundation Trust; King's College Hospital NHS Foundation Trust; Guy's & St Thomas' NHS Foundation Trust; Public Health England; Imperial College London	27	W B SAUNDERS CO LTD	LONDON	J INFECTION	2021	15	14.3	10.1016/j.jinf.2021.06.014	8	Infectious Diseases	34146598	WOS:000677591900013
Nanopore metagenomic sequencing to investigate nosocomial transmission of human metapneumovirus from a unique genetic group among haematology patients in the United Kingdom	Xu, YF; Lewandowski, K; Jeffery, K; Downs, LO; Foster, D; Sanderson, ND; Kavanagh, J; Vaughan, A; Salvagno, C; Vipond, R; Carroll, M; Danby, R; Peto, T; Crook, D; Walker, AS; Matthews, PC; Pullan, ST	JOURNAL OF INFECTION	English	Article	Human metapneumovirus; HMPV; Nanopore sequencing; Metagenomics; Haematology; Nosocomial transmission; Outbreak; Infection control; Epidemiology	INFECTION; EPIDEMIOLOGY; CHILDREN	Background: Human metapneumovirus (HMPV) infection causes a spectrum of respiratory tract disease, and may be a significant pathogen in the context of immunocompromise. Here, we report direct-from-sample metagenomic sequencing of HMPV using Oxford Nanopore Technology. Methods: We applied this sequencing approach to 25 respiratory samples that had been submitted to a clinical diagnostic laboratory…	University of Oxford; University of Oxford; Public Health England; Oxford University Hospitals NHS Foundation Trust; University of Oxford; University of Oxford; Oxford University Hospitals NHS Foundation Trust; University of Oxford	21	W B SAUNDERS CO LTD	LONDON	J INFECTION	2020	15	14.3	10.1016/j.jinf.2020.02.003	7	Infectious Diseases	32092386	WOS:000526407300017
Comparison of Illumina and Oxford Nanopore Sequencing Technologies for Pathogen Detection from Clinical Matrices Using Molecular Inversion Probes	Stefan, CP; Hall, AT; Graham, AS; Minogue, TD	JOURNAL OF MOLECULAR DIAGNOSTICS	English	Article	/	/	Next-generation sequencing is rapidly finding footholds in numerous microbiological fields, including infectious disease diagnostics. Here, we describe a molecular inversion probe panel for the identification of bacterial, viral, and parasitic pathogens. We describe the ability of Illumina and Oxford Nanopore Technologies (ONT) to sequence small amplicons originating from this panel for the ident…	United States Department of Defense; United States Army; United States Army Medical Research Institute of Infectious Diseases	29	ELSEVIER SCIENCE INC	NEW YORK	J MOL DIAGN	2022	15	3.4	10.1016/j.jmoldx.2021.12.005	11	Pathology	35085783	WOS:000804686600010
Analysis of complete Campylobacter concisus genomes identifies genomospecies features, secretion systems and novel plasmids and their association with severe ulcerative colitis	Liu, F; Chen, SY; Luu, LDW; Lee, SA; Tay, ACY; Wu, RC; Riordan, SM; Lan, RT; Liu, L; Zhang, L	MICROBIAL GENOMICS	English	Article	Campylobacter concisus; Campylobacters; inflammatory bowel disease; secretion system; ulcerative colitis	SEQUENCE; ALIGNMENT	Campylobacter concisus is an emerging enteric pathogen that is associated with several gastrointestinal diseases, such as inflammatory bowel disease (IBD), which includes Crohn's disease (CD) and ulcerative colitis (UC). Currently, only three complete C. concisus genomes are available and more complete C. concisus genomes are needed in order to better understand the genomic features and pathogeni…	University of New South Wales Sydney; University of Western Australia; University of New South Wales Sydney; Prince of Wales Hospital (POWH); University of New South Wales Sydney	59	MICROBIOLOGY SOC	LONDON	MICROB GENOMICS	2020	15	4	10.1099/mgen.0.000457	13	Genetics & Heredity; Microbiology	33111662	WOS:000596490900005
Amplicon and Metagenomic Analysis of Middle East Respiratory Syndrome (MERS) Coronavirus and the Microbiome in Patients with Severe MERS	Aljabr, W; Alruwaili, M; Penrice-Randal, R; Alrezaihi, A; Harrison, AJ; Ryan, Y; Bentley, E; Jones, B; Alhatlani, BY; AlShahrani, D; Mahmood, Z; Rickett, NY; Alosaimi, B; Naeem, A; Alamri, S; Alsran, H; Hamed, ME; Dong, XF; Assiri, AM; Alrasheed, AR; Hamza, M; Carroll, MW; Gemmell, M; Darby, A; Donovan-Banfield, I; Stewart, JP; Matthews, DA; Davidson, AD; Hiscox, JA	MSPHERE	English	Article	MERS-CoV; MinION; metagenomics; sequencing	RECOMBINATION; INFECTIONS; VACCINE; SARS	Middle East respiratory syndrome coronavirus (MERS-CoV) is a zoonotic infection that emerged in the Middle East in 2012. Symptoms range from mild to severe and include both respiratory and gastrointestinal illnesses. The virus is mainly present in camel populations with occasional zoonotic spill over into humans. The severity of infection in humans is influenced by numerous factors, and similar t…	King Fahad Medical City; University of Liverpool; Qassim University; King Saud University; Ministry of Health - Saudi Arabia; Public Health England; University of Bristol; Agency for Science Technology & Research (A*STAR)	55	AMER SOC MICROBIOLOGY	WASHINGTON	MSPHERE	2021	15	3.7	10.1128/msphere.00219-21	19	Microbiology	34287009	WOS:000709948400016
Short report: Introduction of chikungunya virus ECSA genotype into the Brazilian Midwest and its dispersion through the Americas	de Oliveira, EC; Fonseca, V; Xavier, J; Adelino, T; Claro, IM; Fabri, A; Macario, EM; Viniski, AE; Souza, CLC; da Costa, ESG; de Sousa, CS; Duarte, FGD; de Medeiros, AC; de Albuquerque, CFC; Cunha, RV; De Moura, NFO; de Filippis, AMB; de Oliveira, T; Lourenço, J; de Abreu, AL; Alcantara, LC; Giovanetti, M	PLOS NEGLECTED TROPICAL DISEASES	English	Article	/	ZIKA	Since introduction into Brazil in 2014, chikungunya virus (CHIKV) has presented sustained transmission, although much is unknown about its circulation in the midwestern states. Here, we analyze 24 novel partial and near complete CHIKV genomes from Cuiaba, an urban metropolis located in the Brazilian midwestern state of Mato Grosso (MT). Nanopore technology was used for sequencing CHIKV complete g…	Universidade Federal de Minas Gerais; University of Kwazulu Natal; Universidade de Sao Paulo; Universidade de Sao Paulo; Fundacao Oswaldo Cruz; Pan American Health Organization; Fundacao Oswaldo Cruz; University of Oxford	26	PUBLIC LIBRARY SCIENCE	SAN FRANCISCO	PLOS NEGLECT TROP D	2021	15	3.4	10.1371/journal.pntd.0009290	10	Infectious Diseases; Parasitology; Tropical Medicine	33861753	WOS:000641473600002
Culture-independent analysis of liver abscess using nanopore sequencing	Gong, L; Huang, YT; Wong, CH; Chao, WC; Wu, ZY; Wei, CL; Liu, PY	PLOS ONE	English	Article	/	KLEBSIELLA-PNEUMONIAE; IDENTIFICATION; PATHOGENS; BACTERIA; DISEASE; TAIWAN; TRENDS; MODEL; ABC	The identification of microbial species has depended predominantly upon culture-based techniques. However, the difficulty with which types of organisms are cultured implies that the grown species may be overrepresented by both cultivation and plate counts. In recent years, culture-independent analysis using high-throughput sequencing has been advocated for use as a point-of-care diagnostic tool. …	Jackson Laboratory; National Chung Cheng University; Taichung Veterans General Hospital; National Chung Hsing University; University of Connecticut; China Medical University Taiwan; Taichung Veterans General Hospital; National Chung Hsing University	28	PUBLIC LIBRARY SCIENCE	SAN FRANCISCO	PLOS ONE	2018	15	2.9	10.1371/journal.pone.0190853	11	Science & Technology - Other Topics	29315344	WOS:000419655900027
Long-read assays shed new light on the transcriptome complexity of a viral pathogen	Tombácz, D; Prazsák, I; Csabai, Z; Moldován, N; Dénes, B; Snyder, M; Boldogkoi, Z	SCIENTIFIC REPORTS	English	Article	/	VACCINIA VIRUS; GENE-EXPRESSION; NUCLEOTIDE-SEQUENCE; RNA-POLYMERASE; GENOME; TERMINATION; INITIATION; INTERMEDIATE; POLYPEPTIDE; HERPESVIRUS	Characterization of global transcriptomes using conventional short-read sequencing is challenging due to the insensitivity of these platforms to transcripts isoforms, multigenic RNA molecules, and transcriptional overlaps. Long-read sequencing (LRS) can overcome these limitations by reading full-length transcripts. Employment of these technologies has led to the redefinition of transcriptional co…	Szeged University; Stanford University	72	NATURE PORTFOLIO	BERLIN	SCI REP-UK	2020	15	3.8	10.1038/s41598-020-70794-5	13	Science & Technology - Other Topics	32796917	WOS:000573282100014
Rapid Amplicon Nanopore Sequencing (RANS) for the Differential Diagnosis of Monkeypox Virus and Other Vesicle-Forming Pathogens	Israeli, O; Guedj-Dana, Y; Shifman, O; Lazar, S; Cohen-Gihon, I; Amit, S; Ben-Ami, R; Paran, N; Schuster, O; Weiss, S; Zvi, A; Beth-Din, A	VIRUSES-BASEL	English	Article	Monkeypox virus; Oxford nanopore; Flongle; Orthopoxvirus; vesicle-forming pathogens; variola virus; smallpox	REAL-TIME PCR; ORTHOPOXVIRUS DNA; SMALLPOX; VARIOLA; DISCRIMINATION; IDENTIFICATION; LISTER; MODEL	As of July 2022, more than 16,000 laboratory-confirmed monkeypox (MPX) cases have been reported worldwide. Until recently, MPX was a rare viral disease seldom detected outside Africa. MPX virus (MPXV) belongs to the Orthopoxvirus (OPV) genus and is a genetically close relative of the Variola virus (the causative agent of smallpox). Following the eradication of smallpox, there was a significant de…	Chaim Sheba Medical Center; Tel Aviv University; Tel Aviv University; Sackler Faculty of Medicine	36	MDPI	BASEL	VIRUSES-BASEL	2022	15	3.8	10.3390/v14081817	10	Virology	36016439	WOS:000846589200001
Genome Profiling of SARS-CoV-2 in Indonesia, ASEAN and the Neighbouring East Asian Countries: Features, Challenges and Achievements	Cahyani, I; Putro, EW; Ridwanuloh, AM; Wibowo, S; Hariyatun, H; Syahputra, G; Akbariani, G; Utomo, AR; Ilyas, M; Loose, M; Kusharyoto, W; Susanti, S	VIRUSES-BASEL	English	Article	ASEAN; COVID-19; genomic surveillance; GISAID; nanopore; NICCRAT; SARS-CoV-2; variants of concern; whole-genome sequencing	/	Whole-genome sequencing (WGS) has played a significant role in understanding the epidemiology and biology of SARS-CoV-2 virus. Here, we investigate the use of SARS-CoV-2 WGS in Southeast and East Asian countries as a genomic surveillance during the COVID-19 pandemic. Nottingham-Indonesia Collaboration for Clinical Research and Training (NICCRAT) initiative has facilitated collaboration between th…	University of Nottingham; YARSI University; University of Nottingham; Universitas Muhammadiyah Purwokerto	43	MDPI	BASEL	VIRUSES-BASEL	2022	15	3.8	10.3390/v14040778	18	Virology	35458508	WOS:000785343300001
Assessment of Viral Targeted Sequence Capture Using Nanopore Sequencing Directly from Clinical Samples	Schuele, L; Cassidy, H; Lizarazo, E; Strutzberg-Minder, K; Schuetze, S; Loebert, S; Lambrecht, C; Harlizius, J; Friedrich, AW; Peter, S; Niesters, HGM; Rossen, JWA; Couto, N	VIRUSES-BASEL	English	Article	next-generation sequencing; one health; shotgun metagenomic sequencing; porcine viruses; targeted sequence capture; viral metagenomics; virome	IDENTIFICATION	Shotgun metagenomic sequencing (SMg) enables the simultaneous detection and characterization of viruses in human, animal and environmental samples. However, lack of sensitivity still poses a challenge and may lead to poor detection and data acquisition for detailed analysis. To improve sensitivity, we assessed a broad scope targeted sequence capture (TSC) panel (ViroCap) in both human and animal …	University of Groningen; Eberhard Karls University of Tubingen; Eberhard Karls University Hospital; Utah System of Higher Education; University of Utah; University of Bath	30	MDPI	BASEL	VIRUSES-BASEL	2020	15	3.8	10.3390/v12121358	14	Virology	33260903	WOS:000602299200001
Complete nontuberculous mycobacteria whole genomes using an optimized DNA extraction protocol for long-read sequencing	Bouso, JM; Planet, PJ	BMC GENOMICS	English	Article	Mycobacteria; Long-read sequencing; Whole genome sequencing; Nontuberculous mycobacteria; Mycobacterium avium complex; Mycobacterium abscessus complex; Genome assembly; Cystic fibrosis; Chronic obstructive pulmonary disease; Bronchiectasis	CYSTIC-FIBROSIS; ABSCESSUS; EPIDEMIOLOGY; INFECTION	Background: Nontuberculous mycobacteria (NTM) are a major cause of pulmonary and systemic disease in at-risk populations. Gaps in knowledge about transmission patterns, evolution, and pathogenicity during infection have prompted a recent surge in genomic NTM research. Increased availability and affordability of whole genome sequencing (WGS) techniques provide new opportunities to sequence and con…	University of Pennsylvania; Pennsylvania Medicine; Childrens Hospital of Philadelphia; University of Pennsylvania; Pennsylvania Medicine; Childrens Hospital of Philadelphia; University of Pennsylvania; American Museum of Natural History (AMNH)	57	BMC	LONDON	BMC GENOMICS	2019	14	3.5	10.1186/s12864-019-6134-y	12	Biotechnology & Applied Microbiology; Genetics & Heredity	31666009	WOS:000500573600002
Optimized bacterial community characterization through full-length 16S rRNA gene sequencing utilizing MinION nanopore technology	Bertolo, A; Valido, E; Stoyanov, J	BMC MICROBIOLOGY	English	Article	Bacterial DNA; 16S rRNA gene-based sequencing; V1-V9 region; Nanopore sequencing	MICROBIOME; DATABASE; DNA; AMPLIFICATION; JOURNEY; REFSEQ	BackgroundAccurate identification of bacterial communities is crucial for research applications, diagnostics, and clinical interventions. Although 16S ribosomal RNA (rRNA) gene sequencing is a widely employed technique for bacterial taxonomic classification, it often results in misclassified or unclassified bacterial taxa. This study sought to refine the full-length 16S rRNA gene sequencing proto…	Swiss Paraplegic Research; University of Bern; University Hospital of Bern; University of Bern	45	BMC	LONDON	BMC MICROBIOL	2024	14	4	10.1186/s12866-024-03208-5	12	Microbiology	38365589	WOS:001163622800001
Rapid Identification of Drug-Resistant Tuberculosis Genes Using Direct PCR Amplification and Oxford Nanopore Technology Sequencing	Zhao, KS; Tu, CL; Chen, W; Liang, HY; Zhang, WJ; Wang, YL; Jin, Y; Hu, JR; Sun, YM; Xu, J; Yu, YF	CANADIAN JOURNAL OF INFECTIOUS DISEASES & MEDICAL MICROBIOLOGY	English	Article	/	MYCOBACTERIUM-TUBERCULOSIS; ANTIBIOTIC-RESISTANCE; MUTATIONS; MINION; CAPREOMYCIN; AMIKACIN; RPOB	Mycobacterium tuberculosis antimicrobial resistance has been continually reported and is a major public health issue worldwide. Rapid prediction of drug resistance is important for selecting appropriate antibiotic treatments, which significantly increases cure rates. Gene sequencing technology has proven to be a powerful strategy for identifying relevant drug resistance information. This study es…	Shanghai University of Medicine & Health Sciences; Shanghai University of Medicine & Health Sciences	49	HINDAWI LTD	LONDON	CAN J INFECT DIS MED	2022	14	2.6	10.1155/2022/7588033	8	Infectious Diseases; Microbiology	35386470	WOS:000932792200001
Nanopore-based sensing devices and applications to genome sequencing: a brief history and the missing pieces	Huang, S	CHINESE SCIENCE BULLETIN	English	Review	Nanopore; Single molecule; Human genome sequencing; Membrane protein; Alpha haemolysin; Lipid bilayer; $1,000 Genome	STAPHYLOCOCCAL ALPHA-HEMOLYSIN; MOLECULE DNA DETECTION; SINGLE-STRANDED-DNA; SOLID-STATE; BIOLOGICAL NANOPORE; TRANSLOCATION; RECOGNITION; RESOLUTION; GRAPHENE; ORIGAMI	A nanopore on an impermeable membrane, which separates two chambers containing electrolytic solution, can be used as a nanometre-sized Coulter counter for single-molecule biological sensing. With an applied potential, charged molecules are electrically dragged through the pore, and the analytical information is sequentially read out from the current blockades. Nucleic acid, which is an electrical…	University of Oxford	91	SCIENCE PRESS	BEIJING	CHINESE SCI BULL	2014	14	/	10.1007/s11434-014-0641-7	11	Science & Technology - Other Topics	/	WOS:000344861500003
Altered subgenomic RNA abundance provides unique insight into SARS-CoV-2 B.1.1.7/Alpha variant infections	Parker, MD; Stewart, H; Shehata, OM; Lindsey, BB; Shah, DR; Hsu, S; Keeley, AJ; Partridge, DG; Leary, S; Cope, A; State, A; Johnson, K; Ali, N; Raghei, R; Heffer, J; Smith, N; Zhang, PJ; Gallis, M; Louka, SF; Hornsby, HR; Alamri, H; Whiteley, M; Foulkes, BH; Christou, S; Wolverson, P; Pohare, M; Hansford, SE; Green, LR; Evans, C; Raza, M; Wang, D; Firth, AE; Edgar, JR; Gaudieri, S; Mallal, S; Col…	COMMUNICATIONS BIOLOGY	English	Article	/	/	Matthew Parker et al. use the ARTIC network tiled amplicon PCR and Oxford Nanopore sequencing of thousands of SARS-CoV-2 samples to detect subgenomic RNA changes in the B.1.1.7 lineage endemic in the UK in late 2020/early 2021. They discovered higher subgenomic RNA in B.1.1.7 compared to previous lineages, and find a noncanonical subgenomic RNA that could encode ORF9b. B.1.1.7 lineage SARS-CoV-2 …	University of Sheffield; University of Sheffield; University of Cambridge; University of Sheffield; University of Sheffield; University of Sheffield; University of Sheffield; Murdoch University; University of Sheffield; University of Sheffield; Vanderbilt University; University of Western Australia	35	NATURE PORTFOLIO	BERLIN	COMMUN BIOL	2022	14	5.2	10.1038/s42003-022-03565-9	10	Life Sciences & Biomedicine - Other Topics; Science & Technology - Other Topics	35790808	WOS:000821045700005
Tiled-ClickSeq for targeted sequencing of complete coronavirus genomes with simultaneous capture of RNA recombination and minority variants	Jaworski, E; Langsjoen, RM; Mitchell, B; Judy, B; Newman, P; Plante, JA; Plante, KS; Miller, AL; Zhou, YY; Swetnam, D; Sotcheff, S; Morris, V; Saada, N; Machado, RRG; McConnell, A; Widen, SG; Thompson, J; Dong, JL; Ren, P; Pyles, RB; Ksiazek, TG; Menachery, VD; Weaver, SC; Routh, AL	ELIFE	English	Article	SARS-CoV-2; ClickSeq; Genomics; Nanopore Sequencing; Defective RNAs; Next-Generation Sequencing; Viruses	DEFECTIVE INTERFERING RNA; MURINE CORONAVIRUS; VIRAL POPULATIONS; READ ALIGNMENT; GENERATION; PARTICLES; FRAGMENTATION; LIGATION	High-throughput genomics of SARS-CoV-2 is essential to characterize virus evolution and to identify adaptations that affect pathogenicity or transmission. While single-nucleotide variations (SNVs) are commonly considered as driving virus adaption, RNA recombination events that delete or insert nucleic acid sequences are also critical. Whole genome targeting sequencing of SARS-CoV-2 is typically a…	University of Texas System; University of Texas Medical Branch Galveston; University of Texas System; University of Texas Medical Branch Galveston; University of Texas System; University of Texas Medical Branch Galveston; University of Texas System; University of Texas Medical Branch Galveston; University of Texas System; University of Texas Medical Branch Galveston; University of Texas System; U…	59	eLIFE SCIENCES PUBL LTD	CAMBRIDGE	ELIFE	2021	14	6.4	10.7554/eLife.68479; 10.7554/eLife.68479.sa1; 10.7554/eLife.68479.sa2	22	Life Sciences & Biomedicine - Other Topics	34581669	WOS:000703110600001
Nanopore-based metagenomic sequencing for the rapid and precise detection of pathogens among immunocompromised cancer patients with suspected infections	Deng, QM; Cao, YQ; Wan, XF; Wang, B; Sun, AM; Wang, HZ; Wang, YF; Wang, HZ; Gu, HC	FRONTIERS IN CELLULAR AND INFECTION MICROBIOLOGY	English	Article	cancer; pathogen detection; infections; metagenomic sequencing; nanopore amplicon sequencing	MICROBIAL SPECTRUM; CHEMOTHERAPY; TUBERCULOSIS; DIAGNOSIS; RESISTANT; MINION; RISK	Cancer patients are at high risk of infections and infection-related mortality; thereby, prompt diagnosis and precise anti-infectives treatment are critical. This study aimed to evaluate the performance of nanopore amplicon sequencing in identifying microbial agents among immunocompromised cancer patients with suspected infections. This prospective study enlisted 56 immunocompromised cancer patie…	Chinese Academy of Sciences; Hefei Institutes of Physical Science, CAS; Chinese Academy of Sciences; University of Science & Technology of China, CAS; Chinese Academy of Sciences; Hefei Institutes of Physical Science, CAS; Chinese Academy of Sciences; University of Chinese Academy of Sciences, CAS	61	FRONTIERS MEDIA SA	LAUSANNE	FRONT CELL INFECT MI	2022	14	4.6	10.3389/fcimb.2022.943859	12	Immunology; Microbiology	36204638	WOS:000872779700001
A Sample-to-Report Solution for Taxonomic Identification of Cultured Bacteria in the Clinical Setting Based on Nanopore Sequencing	Neuenschwander, SM; Miani, MAT; Amlang, H; Perroulaz, C; Bittel, P; Casanova, C; Droz, S; Flandrois, JP; Leib, SL; Suter-Riniker, F; Ramette, A	JOURNAL OF CLINICAL MICROBIOLOGY	English	Article	taxonomy; 16S RNA gene; bioinformatics; clinical methods; diagnostics; nanopore; sequencing	ALIGNMENT	Amplicon sequencing of the 165 rRNA gene is commonly used for the identification of bacterial isolates in diagnostic laboratories and mostly relies on the Sanger sequencing method. The latter, however, suffers from a number of limitations, with the most significant being the inability to resolve mixed amplicons when closely related species are coamplified from a mixed culture. This often leads to…	University of Bern; Centre National de la Recherche Scientifique (CNRS); CNRS - Institute of Ecology & Environment (INEE); VetAgro Sup	39	AMER SOC MICROBIOLOGY	WASHINGTON	J CLIN MICROBIOL	2020	14	6.1	10.1128/JCM.00060-20	12	Microbiology	32229603	WOS:000582368300004
New Insights of Corynebacterium kroppenstedtii in Granulomatous Lobular Mastitis based on Nanopore Sequencing	Li, XQ; Yuan, JP; Fu, AS; Wu, HL; Liu, R; Liu, TG; Sun, SR; Chen, C	JOURNAL OF INVESTIGATIVE SURGERY	English	Article	Granulomatous lobular mastitis; bacteria; Corynebacterium kroppenstedtii; early stage	ETIOLOGY	Background The etiology of granulomatous lobular mastitis (GLM) remains unknown. This study aimed to detect bacteria in GLM using Nanopore sequencing and identify the relationship between GLM and Corynebacterium kroppenstedtii. Methods and materials The bacterial detection on fresh samples (including breast pus and tissue) of 50 GLM patients using nanopore sequencing and culture methods. The bact…	Wuhan University; Wuhan University; Wuhan University; Ministry of Education - China; Wuhan University	43	TAYLOR & FRANCIS INC	PHILADELPHIA	J INVEST SURG	2022	14	2.1	10.1080/08941939.2021.1921082	8	Surgery	34036894	WOS:000655098900001
Optimizing Nanopore Sequencing for Rapid Detection of Microbial Species and Antimicrobial Resistance in Patients at Risk of Surgical Site Infections	Whittle, E; Yonkus, JA; Jeraldo, P; Alva-Ruiz, R; Nelson, H; Kendrick, ML; Grys, TE; Patel, R; Truty, MJ; Chia, N	MSPHERE	English	Article	antimicrobial resistance; microbial detection; nanopore sequencing; surgical site infection	ANTIBIOTIC EXPOSURE; POSTOPERATIVE COMPLICATIONS; ADJUVANT CHEMOTHERAPY; DNA-DAMAGE; BACTERIAL; CULTURE; AZITHROMYCIN; BACTEREMIA; STRATEGIES; ACID	Surgical site infections (SSI) are a significant burden to patients and health care systems. We evaluated the use of Nanopore sequencing (NS) to rapidly detect microbial species and antimicrobial resistance (AMR) genes present in intraoperative bile aspirates. Bile aspirates from 42 patients undergoing pancreatic head resection were included. Three methods of DNA extraction using mechanical cell …	Mayo Clinic; Mayo Clinic; American College of Surgeons; Mayo Clinic; Mayo Clinic Phoenix; Mayo Clinic	92	AMER SOC MICROBIOLOGY	WASHINGTON	MSPHERE	2022	14	3.7	10.1128/msphere.00964-21	20	Microbiology	35171692	WOS:000778088300019
Application of cell-free DNA sequencing in characterization of bloodborne microbes and the study of microbe-disease interactions	Chiu, KP; Yu, AL	PEERJ	English	Article	Cell-free DNA; Next-generation sequencing; Microbial species identification; cfDNA sequencing; Microbial cfDNA sequencing	URINARY-TRACT-INFECTION; RENAL-TRANSPLANTATION; IDENTIFICATION; BACTERIA	It is an important issue whether microorganisms can live harmoniously with normal ells in the cardiovascular system. The answer to the question will have enormous impact on medical microbiology. To address the issue, it is essential to identify and characterize the bloodborne microbes in an efficient and comprehensive manner. Due to microbial sequence complexity and the composition of significant…	Academia Sinica - Taiwan; National Taiwan University; University of California System; University of California San Diego; Chang Gung University	48	PEERJ INC	LONDON	PEERJ	2019	14	2.3	10.7717/peerj.7426	15	Science & Technology - Other Topics	31404440	WOS:000479053200009
Nanopore sequencing of SARS-CoV-2: Comparison of short and long PCR-tiling amplicon protocols	Brejová, B; Borsová, K; Hodorová, V; Cabanová, V; Gafurov, A; Fricová, D; Nebohácová, M; Vinar, T; Klempa, B; Nosek, J	PLOS ONE	English	Article	/	/	Surveillance of the SARS-CoV-2 variants including the quickly spreading mutants by rapid and near real-time sequencing of the viral genome provides an important tool for effective health policy decision making in the ongoing COVID-19 pandemic. Here we evaluated PCR-tiling of short (similar to 400-bp) and long (similar to 2 and similar to 2.5-kb) amplicons combined with nanopore sequencing on a Mi…	Comenius University Bratislava; Slovak Academy of Sciences; Institute of Virology, SAS; Biomedical Research Center, SAS; Comenius University Bratislava; Comenius University Bratislava; Slovak Academy of Sciences; Institute of Neuroimmunology, SAS; Comenius University Bratislava	44	PUBLIC LIBRARY SCIENCE	SAN FRANCISCO	PLOS ONE	2021	14	2.9	10.1371/journal.pone.0259277	17	Science & Technology - Other Topics	34714886	WOS:000755042500042
Phylogenomic Evidence of Reinfection and Persistence of SARS-CoV-2: First Report from Colombia	Ramírez, JD; Muñoz, M; Ballesteros, N; Patiño, LH; Castañeda, S; Rincón, CA; Mendez, C; Oliveros, C; Perez, J; Márquez, EK; Ortiz, FD; Correa-Cárdenas, CA; Duque, MC; Paniz-Mondolfi, A	VACCINES	English	Article	SARS-CoV-2; reinfections; genomic surveillance; Colombia	/	The continuing evolution of SARS-CoV-2 and the emergence of novel variants have raised concerns about possible reinfection events and potential changes in the coronavirus disease 2019 (COVID-19) transmission dynamics. Utilizing Oxford Nanopore technologies, we sequenced paired samples of three patients with positive RT-PCR results in a 1-2-month window period, and subsequent phylogenetics and gen…	Universidad del Rosario; Icahn School of Medicine at Mount Sinai	33	MDPI	BASEL	VACCINES-BASEL	2021	14	5.2	10.3390/vaccines9030282	10	Immunology; Research & Experimental Medicine	33808687	WOS:000634211100001
Whole-Genome Sequencing of Human Enteroviruses from Clinical Samples by Nanopore Direct RNA Sequencing	Grädel, C; Miani, MAT; Baumann, C; Barbani, MT; Neuenschwander, S; Leib, SL; Suter-Riniker, F; Ramette, A	VIRUSES-BASEL	English	Article	enterovirus; direct RNA sequencing; nanopore	RT-PCR; AMPLIFICATION; IDENTIFICATION; MINION; TOOL	Enteroviruses are small RNA viruses that affect millions of people each year by causing an important burden of disease with a broad spectrum of symptoms. In routine diagnostic laboratories, enteroviruses are identified by PCR-based methods, often combined with partial sequencing for genotyping. In this proof-of-principle study, we assessed direct RNA sequencing (DRS) using nanopore sequencing tec…	University of Bern; University of Bern	36	MDPI	BASEL	VIRUSES-BASEL	2020	14	3.8	10.3390/v12080841	13	Virology	32752120	WOS:000578897200001
Exploring the hepatitis C virus genome using single molecule real-time sequencing	Takeda, H; Yamashita, T; Ueda, Y; Sekine, A	WORLD JOURNAL OF GASTROENTEROLOGY	English	Review	Third generation sequencing; PacBio RSII; Single molecule real-time sequencing; Hepatitis C virus; Resistance-associated substitution; Nanopore sequencer	HCV GENOTYPE 1; DACLATASVIR PLUS ASUNAPREVIR; PROTEASE INHIBITOR; RESISTANCE ANALYSIS; LEDIPASVIR; INFECTION; SOFOSBUVIR; NS5A; VARIANTS; THERAPY	Single molecular real-time (SMRT) sequencing,also called third-generation sequencing, is a novel sequencing technique capable of generating extremely long contiguous sequence reads. While conventional short-read sequencing cannot evaluate the linkage of nucleotide substitutions distant from one another, SMRT sequencing can directly demonstrate linkage of nucleotide changes over a span of more tha…	Chiba University; Kyoto University	53	BAISHIDENG PUBLISHING GROUP INC	PLEASANTON	WORLD J GASTROENTERO	2019	14	4.3	10.3748/wjg.v25.i32.4661	12	Gastroenterology & Hepatology	31528092	WOS:000483929900006
Nanopore 16S sequencing enhances the detection of bacterial meningitis after neurosurgery	Jang, Y; Kim, S; Kim, N; Son, H; Ha, EJ; Koh, EJ; Phi, JH; Park, CK; Kim, JE; Kim, SK; Lee, SK; Cho, WS; Moon, J; Chu, K	ANNALS OF CLINICAL AND TRANSLATIONAL NEUROLOGY	English	Article	/	INTENSIVE-CARE-UNIT; RISK-FACTORS; CRANIOTOMY; INFECTION; FEVER; MANAGEMENT; ILLUMINA; GENOMICS	Objective: Nosocomial bacterial meningitis is one of the major complications after neurosurgery. We performed nanopore 16S amplicon sequencing from cerebrospinal fluid (CSF) to evaluate bacterial meningitis in patients who underwent neurosurgery. Methods: Among the patients who visited the neurosurgery department of Seoul National University Hospital between July 2017 and June 2020, those with cl…	Seoul National University (SNU); Seoul National University Hospital; Seoul National University (SNU); Seoul National University Hospital; Seoul National University (SNU); Seoul National University Hospital; Seoul National University (SNU); Seoul National University Hospital	41	WILEY	HOBOKEN	ANN CLIN TRANSL NEUR	2022	13	4.4	10.1002/acn3.51517	14	Neurosciences & Neurology	35124895	WOS:000751644100001
Rapid and Accurate Sequencing of Enterovirus Genomes Using MinION Nanopore Sequencer	Wang, J; Ke, YH; Zhang, Y; Huang, KQ; Wang, L; Shen, XX; Dong, XP; Xu, WB; Ma, XJ	BIOMEDICAL AND ENVIRONMENTAL SCIENCES	English	Article	Nanopore sequencing; MinION; Enterovirus; Single molecule sequencing; Viral genome sequencing	REAL-TIME; BACTERIAL; IDENTIFICATION	Objective Knowledge of an enterovirus genome sequence is very important in epidemiological investigation to identify transmission patterns and ascertain the extent of an outbreak. The MinION sequencer is increasingly used to sequence various viral pathogens in many clinical situations because of its long reads, portability, real-time accessibility of sequenced data, and very low initial costs. Ho…	Chinese Center for Disease Control & Prevention; National Institute for Viral Disease Control & Prevention, Chinese Center for Disease Control & Prevention	33	CHINESE CENTER DISEASE CONTROL & PREVENTION	BEIJING	BIOMED ENVIRON SCI	2017	13	3	10.3967/bes2017.097	10	Environmental Sciences & Ecology; Public, Environmental & Occupational Health	29122092	WOS:000415749300003
Rapid diagnosis of Capnocytophaga canimorsus septic shock in an immunocompetent individual using real-time Nanopore sequencing: a case report	Bialasiewicz, S; Duarte, TPS; Nguyen, SH; Sukumaran, V; Stewart, A; Appleton, S; Pitt, ME; Bainomugisa, A; Jennison, AV; Graham, R; Coin, LJM; Hajkowicz, K	BMC INFECTIOUS DISEASES	English	Article	Nanopore sequencing; Droplet digital PCR; Capnocytophaga canimorsus; Diagnosis; Sepsis	ACUTE CHOLECYSTITIS; IDENTIFICATION	BackgroundRapid diagnosis and appropriate treatment is imperative in bacterial sepsis due increasing risk of mortality with every hour without appropriate antibiotic therapy. Atypical infections with fastidious organisms may take more than 4days to diagnose leading to calls for improved methods for rapidly diagnosing sepsis. Capnocytophaga canimorsus is a slow-growing, fastidious gram-negative ba…	University of Queensland; University of Queensland; Royal Brisbane & Women's Hospital; University of Queensland; Queensland Health	15	BMC	LONDON	BMC INFECT DIS	2019	13	3.4	10.1186/s12879-019-4173-2	5	Infectious Diseases	31340776	WOS:000477032500003
Nanopore and Illumina Genome Sequencing of Fusarium oxysporum f. sp. lini Strains of Different Virulence	Dvorianinova, EM; Pushkova, EN; Novakovskiy, RO; Povkhova, LV; Bolsheva, NL; Kudryavtseva, LP; Rozhmina, TA; Melnikova, NV; Dmitriev, AA	FRONTIERS IN GENETICS	English	Article	Fusarium oxysporum; flax pathogen; different virulence; genome sequencing; nanopore sequencing; de novo genome assembly	FORMAE-SPECIALES; CHROMOSOMES; DIVERSITY; WILT	/	Russian Academy of Sciences; Engelhardt Institute of Molecular Biology, RAS; Moscow Institute of Physics & Technology	47	FRONTIERS MEDIA SA	LAUSANNE	FRONT GENET	2021	13	2.8	10.3389/fgene.2021.662928	7	Genetics & Heredity	34220940	WOS:000668670000001
Rapid Diagnosis of Mycobacterium marinum Infection by Next-Generation Sequencing: A Case Report	Xing, FF; Lo, SKF; Ma, YC; Ip, JD; Chan, WM; Zhou, MX; Gong, MZ; Lau, SKP; Woo, PCY	FRONTIERS IN MEDICINE	English	Article	Mycobacterium marinum; non-tuberculosis mycobacteria; next-generation sequencing; Oxford Nanopore; MinION	IDENTIFICATION	We present the first report of histology- and culture-proven Mycobacterium marinum infection diagnosed by next-generation sequencing (NGS). It took <2 days to make a microbiological diagnosis using the Oxford Nanopore Technologies' MinION device, compared to 20 days for the mycobacterium to be isolated from the tissue biopsy. NGS is particularly useful for culture-negative and slow-growing microo…	University of Hong Kong; University of Hong Kong; University of Hong Kong	20	FRONTIERS MEDIA SA	LAUSANNE	FRONT MED-LAUSANNE	2022	13	3.1	10.3389/fmed.2022.824122	5	General & Internal Medicine	35187006	WOS:000760656500001
Direct ITR-to-ITR Nanopore Sequencing of AAV Vector Genomes	Namkung, S; Tran, NT; Manokaran, S; He, R; Su, Q; Xie, J; Gao, GP; Tai, PWL	HUMAN GENE THERAPY	English	Article	adeno-associated virus; nanopore; vector heterogeneity; inverted terminal repeat	BINDING; REP68	Recombinant adeno-associated viruses (rAAVs) are currently the most prominently investigated vector platform for human gene therapy. The rAAV capsid serves as a potent and efficient vehicle for delivering genetic payloads into the host cell, while the vector genome determines the function and effectiveness of these biotherapies. However, current production schemes yield vectors that may consist o…	University of Massachusetts System; UMass Chan Medical School; University of Massachusetts Worcester; University of Massachusetts System; University of Massachusetts Worcester; UMass Chan Medical School; University of Massachusetts System; UMass Chan Medical School; University of Massachusetts Worcester; University of Massachusetts System; UMass Chan Medical School; University of Massachusetts Wo…	27	MARY ANN LIEBERT, INC	NEW ROCHELLE	HUM GENE THER	2022	13	4.1	10.1089/hum.2022.143	10	Biotechnology & Applied Microbiology; Genetics & Heredity; Research & Experimental Medicine	36178359	WOS:000885261000010
Resolution of dynamic MDR structures among the plasmidome of Salmonella using MinION single-molecule, long-read sequencing	Li, RC; Chen, KC; Chan, EWC; Chen, S	JOURNAL OF ANTIMICROBIAL CHEMOTHERAPY	English	Article	/	MEDIATED QUINOLONE RESISTANCE; ESCHERICHIA-COLI; ENVIRONMENT; FOOD	Background: ISCR1 is an important mobile genetic element mediating the transfer of antibiotic resistance genes. Genetic diversity regarding distribution and copy numbers of ISCR1 within a bacterial population derived from an ancestral strain, which may reflect the degree of genetic plasticity conferred by such an element, has not been studied. Objectives: To investigate the plasmid heterogeneity …	Hong Kong Polytechnic University; Hong Kong Polytechnic University; Yangzhou University	24	OXFORD UNIV PRESS	OXFORD	J ANTIMICROB CHEMOTH	2018	13	3.9	10.1093/jac/dky243	5	Infectious Diseases; Microbiology; Pharmacology & Pharmacy	29992309	WOS:000452914200013
Complete genome sequence of an extensively drug-resistant Pseudomonas aeruginosa ST773 clinical isolate from North India	Singh, S; Pulusu, CP; Pathak, A; Pradeep, BE; Prasad, KN	JOURNAL OF GLOBAL ANTIMICROBIAL RESISTANCE	English	Article	Extensively drug-resistant; Pseudomonas aeruginosa; ST773; High-risk clone; Whole-genome sequencing	/	Objectives: Pseudomonas aeruginosa is an opportunistic Gram-negative pathogen causing a wide range of community-and hospital-acquired infections. Here we report the complete genome sequence of an extensively drug-resistant (XDR) P. aeruginosa strain (PA790) in order to understand the antibiotic resistance genes (ARGs) harboured by such a strain. Methods: Whole-genome sequencing (WGS) was performe…	Sanjay Gandhi Postgraduate Institute of Medical Sciences; Sri Sathya Sai Institute of Higher Learning	4	ELSEVIER SCI LTD	OXFORD	J GLOB ANTIMICROB RE	2021	13	3.7	10.1016/j.jgar.2021.10.010BY	3	Infectious Diseases; Pharmacology & Pharmacy	34710632	WOS:000720826500002
Differential Alphavirus Defective RNA Diversity between Intracellular and Extracellular Compartments Is Driven by Subgenomic Recombination Events	Langsjoen, RM; Muruato, AE; Kunkel, SR; Jaworski, E; Routh, A	MBIO	English	Article	alphavirus; chikungunya; defective RNA; viral recombination	SEMLIKI-FOREST-VIRUS; EQUINE ENCEPHALITIS-VIRUS; INTERFERING PARTICLES; SINDBIS VIRUS; CHIKUNGUNYA VIRUS; ANTIVIRAL IMMUNITY; SEQUENCE-ANALYSIS; AURA-ALPHAVIRUS; BHK CELLS; GENOME	Alphaviruses are positive-sense RNA arboviruses that can cause either a chronic arthritis or a potentially lethal encephalitis. Like other RNA viruses, alphaviruses produce truncated, defective viral RNAs featuring large deletions during replication. These defective RNAs (D-RNAs) have primarily been isolated from virions after high-multiplicity-of-infection passaging. Here, we aimed to characteri…	University of Texas System; University of Texas Medical Branch Galveston; University of Texas System; University of Texas Medical Branch Galveston; University of Texas System; University of Texas Medical Branch Galveston	79	AMER SOC MICROBIOLOGY	WASHINGTON	MBIO	2020	13	5.1	10.1128/mBio.00731-20	20	Microbiology	32817101	WOS:000572063400004
High Genetic Diversity of Carbapenem-Resistant Acinetobacter baumannii Isolates Recovered in Nigerian Hospitals in 2016 to 2020	Odih, EE; Oaikhena, AO; Underwood, A; Hounmanou, YMG; Oduyebo, OO; Fadeyi, A; Aboderin, AO; Ogunleye, VO; Argimon, S; Akpunonu, VN; Oshun, PO; Egwuenu, A; Okwor, TJ; Ihekweazu, C; Aanensen, DM; Dalsgaard, A; Okeke, IN	MSPHERE	English	Article	Acinetobacter baumannii; antimicrobial resistance; bla(NDM-1); bla(OXA-23); carbapenem resistance; genomics; surveillance	MOLECULAR CHARACTERIZATION; EPIDEMIOLOGY; EMERGENCE; EVOLUTION; GERMANY	Acinetobacter baumannii causes difficult-to-treat infections mostly among immunocompromised patients. Clinically relevant A. baumannii lineages and their carbapenem resistance mechanisms are sparsely described in Nigeria. This study aimed to characterize the diversity and genetic mechanisms of carbapenem resistance among A. baumannii strains isolated from hospitals in southwestern Nigeria. We seq…	University of Ibadan; University of Copenhagen; University of Oxford; University of Lagos; University of Ilorin; Obafemi Awolowo University; University of Ibadan; University College Hospital, Ibadan	67	AMER SOC MICROBIOLOGY	WASHINGTON	MSPHERE	2023	13	3.7	10.1128/msphere.00098-23	14	Microbiology	37067411	WOS:000973169900001
Long-read sequencing reveals the structural complexity of genomic integration of HBV DNA in hepatocellular carcinoma	Zhuo, ZL; Rong, WQ; Li, HX; Li, Y; Luo, XM; Liu, Y; Tang, XK; Zhang, LL; Su, F; Cui, HY; Xiao, F	NPJ GENOMIC MEDICINE	English	Article	/	HEPATITIS-B-VIRUS; EXPRESSION; LIVER; GENE; HPV	The integration of HBV DNA into the human genome can disrupt its structure in hepatocellular carcinoma (HCC), but the complexity of HBV genomic integration remains elusive. Here we applied long-read sequencing to precisely elucidate the HBV integration pattern in the human hepatocellular genome. The DNA library was sequenced using the long-read sequencing on GridION and PacBio Sequel II, respecti…	Peking University; Beijing Hospital; Chinese Academy of Medical Sciences - Peking Union Medical College; Beijing Hospital; Chinese Academy of Medical Sciences - Peking Union Medical College; Chinese Academy of Medical Sciences - Peking Union Medical College; Peking Union Medical College; Cancer Institute & Hospital - CAMS; Chinese Academy of Medical Sciences - Peking Union Medical College; Beijin…	30	NATURE PORTFOLIO	BERLIN	NPJ GENOM MED	2021	13	4.7	10.1038/s41525-021-00245-1	8	Genetics & Heredity	34642322	WOS:000706761900002
Performance of Nanopore and Illumina Metagenomic Sequencing for Pathogen Detection and Transcriptome Analysis in Infantile Central Nervous System Infections	Horiba, K; Torii, Y; Aizawa, Y; Yamaguchi, M; Haruta, K; Okumura, T; Suzuki, T; Kawano, Y; Kawada, JI; Hara, S; Saitoh, A; Giske, CG; Ogi, T; Ito, Y	OPEN FORUM INFECTIOUS DISEASES	English	Article	central nervous system infections; metagenomics; Nanopore sequencing; next-generation sequencing; transcriptomics	MENINGITIS; DIAGNOSIS; ENCEPHALITIS; ENGLAND; EPIDEMIOLOGY	Background Infantile central nervous system infections (CNSIs) can be life-threatening and cause severe sequelae. However, the causative microorganism remains unknown in >40% of patients with aseptic infections. This study aimed to analyze the metagenome for detection of pathogens and the transcriptome for host immune responses during infection in a single cerebrospinal fluid (CSF) sample using 2…	Nagoya University; Nagoya University; Nagoya University; Niigata University; Karolinska Institutet; Karolinska Institutet; Karolinska University Hospital; Nihon University	54	OXFORD UNIV PRESS INC	CARY	OPEN FORUM INFECT DI	2022	13	3.8	10.1093/ofid/ofac504	11	Immunology; Infectious Diseases; Microbiology	36299531	WOS:000871211800002
Molecular and genomic investigation of an urban outbreak of dengue virus serotype 2 in Angola, 2017-2019	Neto, Z; Martinez, PA; Hill, SC; Jandondo, D; Thézé, J; Mirandela, M; Aguiar, RS; Xavier, J; Sebastiao, CD; Cândido, ALM; Vaz, F; Castro, GR; Paixao, JP; Loman, NJ; Lemey, P; Pybus, OG; Vasconcelos, J; Faria, NR; de Morais, J	PLOS NEGLECTED TROPICAL DISEASES	English	Article	/	YELLOW-FEVER; ZIKA VIRUS; EPIDEMIC; SPREAD; TRANSMISSION; EMERGENCE; ACCURACY; LUANDA; HIV-1	BackgroundThe transmission patterns and genetic diversity of dengue virus (DENV) circulating in Africa remain poorly understood. Circulation of the DENV serotype 1 (DENV1) in Angola was detected in 2013, while DENV serotype 2 (DENV2) was detected in 2018. Here, we report results from molecular and genomic investigations conducted at the Ministry of Health national reference laboratory (INIS) in A…	University of London; University of London Royal Veterinary College; University of Oxford; INRAE; Universite Clermont Auvergne (UCA); Universidade Federal de Minas Gerais; Universidade Federal de Minas Gerais; University of Birmingham; KU Leuven; Universidade de Sao Paulo; Imperial College London	61	PUBLIC LIBRARY SCIENCE	SAN FRANCISCO	PLOS NEGLECT TROP D	2022	13	3.4	10.1371/journal.pntd.0010255	17	Infectious Diseases; Parasitology; Tropical Medicine	35584153	WOS:000944355200002
Whole-genome based strain identification of fowlpox virus directly from cutaneous tissue and propagated virus	Asif, K; O'Rourke, D; Legione, AR; Shil, P; Marenda, MS; Noormohammadi, AH	PLOS ONE	English	Article	/	GENE; POXVIRUS; SEQUENCE; AVIPOXVIRUSES; ALIGNMENT	Fowlpox (FP) is an economically important viral disease of commercial poultry. The fowlpox virus (FPV) is primarily characterised by immunoblotting, restriction enzyme analysis in combination with PCR, and/or nucleotide sequencing of amplicons. Whole-genome sequencing (WGS) of FPV directly from clinical specimens prevents the risk of potential genome modifications associated with in vitro culturi…	University of Melbourne; University of Melbourne	40	PUBLIC LIBRARY SCIENCE	SAN FRANCISCO	PLOS ONE	2021	13	2.9	10.1371/journal.pone.0261122	14	Science & Technology - Other Topics	34914770	WOS:000755091500051
MinION Sequencing of colorectal cancer tumour microbiomes-A comparison with amplicon-based and RNA-Sequencing	Taylor, WS; Pearson, J; Miller, A; Schmeier, S; Frizelle, FA; Purcell, RV	PLOS ONE	English	Article	/	GUT MICROBIOME; METAGENOMICS; PLASMIDS	Background Recent evidence suggests a role for the gut microbiome in the development and progression of many diseases and many studies have been carried out to analyse the microbiome using a variety of methods. In this study, we compare MinION sequencing with meta-transcriptomics and amplicon-based sequencing for microbiome analysis of colorectal tumour tissue samples. Methods DNA and RNA were ex…	University of Otago; University of Otago; University of Otago; Massey University	56	PUBLIC LIBRARY SCIENCE	SAN FRANCISCO	PLOS ONE	2020	13	2.9	10.1371/journal.pone.0233170	16	Science & Technology - Other Topics	32433701	WOS:000537510100036
Comparison of third-generation sequencing approaches to identify viral pathogens under public health emergency conditions	Li, Y; He, XZ; Li, MH; Li, B; Yang, MJ; Xie, Y; Zhang, Y; Ma, XJ	VIRUS GENES	English	Article	Public health emergency; Virus identification; High throughput sequencing; Metagenomics; Norovirus GII	YELLOW-FEVER; REAL-TIME; VIRUS; GENOME; IDENTIFICATION; METAGENOMICS; PERFORMANCE	The capability of high-throughput sequencing (HTS) for detection of known and unknown viruses timely makes it a powerful tool for public health emergency response. Third-generation sequencing (TGS) offers advantages in speed and length of detection over second-generation sequencing (SGS). Here, we presented the end-to-end workflows for both Oxford Nanopore MinION and Pacbio Sequel on a viral dise…	Chinese Center for Disease Control & Prevention; National Institute for Viral Disease Control & Prevention, Chinese Center for Disease Control & Prevention; Capital Medical University; Chinese Academy of Sciences; Chinese Academy of Sciences; Institute of Genetics & Developmental Biology, CAS; Chinese Academy of Sciences	36	SPRINGER	DORDRECHT	VIRUS GENES	2020	13	1.9	10.1007/s11262-020-01746-4	10	Genetics & Heredity; Virology	32193781	WOS:000521038700001
Multiplex PCR-Based Nanopore Sequencing and Epidemiological Surveillance of Hantaan orthohantavirus in Apodemus agrarius, Republic of Korea	Park, K; Lee, SH; Kim, J; Lee, J; Lee, GY; Cho, S; Lee, SH; Park, K; No, JS; Budhathoki, S; Kim, YJ; Kim, YS; Kim, HC; Klein, TA; Kim, WK; Song, JW	VIRUSES-BASEL	English	Article	Hantaan virus (HTNV); hemorrhagic fever with renal syndrome (HFRS); next-generation sequencing (NGS); whole-genome sequencing; amplicon-based NGS; MinION sequencing; phylogenetic analysis; genetic diversity; viral genome surveillance	HEMORRHAGIC-FEVER; RENAL SYNDROME; HANTAVIRUS INFECTION; REAL-TIME; VIRUS; TRANSMISSION; MINION; GENOME; RODENTS; ORIGIN	Whole-genome sequencing of infectious agents enables the identification and characterization of emerging viruses. The MinION device is a portable sequencer that allows real-time sequencing in fields or hospitals. Hantaan orthohantavirus (Hantaan virus, HTNV), harbored by Apodemus agrarius, causes hemorrhagic fever with renal syndrome (HFRS) and poses a critical public health threat worldwide. In …	Korea University; Korea University Medicine (KU Medicine); Korea University; Korea University Medicine (KU Medicine); Korea Disease Control & Prevention Agency (KDCA); Hallym University; Hallym University	58	MDPI	BASEL	VIRUSES-BASEL	2021	13	3.8	10.3390/v13050847	16	Virology	34066592	WOS:000654615800001
A novel KPC-113 variant conferring carbapenem and ceftazidime- avibactam resistance in a multidrug-resistant Pseudomonas aeruginosa isolate	Yang, Q; Li, Y; Fang, L; Lei, TL; Cai, H; Hua, XT; Zheng, M; Yu, YS	CLINICAL MICROBIOLOGY AND INFECTION	English	Article	blaKPC-113; Carbapenem-resistant; Ceftazidime-avibactam-resistant; Klebsiella pneumoniae carbapenemase; Pseudomonas aeruginosa	PROTEIN	Objectives: This study aimed to characterize a novel KPC-113 variant from a clinical Pseudomonas aeru-ginosa isolate R20-14.Methods: Genomic DNA of R20-14 was subjected to Illumina and Oxford Nanopore sequencing. The horizontal transmission of plasmid was evaluated with conjugation experiments. Minimum inhibitory concentrations of bacterial strains were obtained using broth microdilution methods.…	Zhejiang University; Zhejiang University; Zhejiang University; Zhejiang University	29	ELSEVIER SCI LTD	London	CLIN MICROBIOL INFEC	2023	12	10.9	10.1016/j.cmi.2022.10.013	8	Infectious Diseases; Microbiology	36252790	WOS:000952219100001
Genomic characterization of conjugative plasmids carrying the mcr-1 gene in foodborne and clinical strains of Salmonella and Escherichia coli	Li, W; Yan, YF; Chen, J; Sun, RW; Wang, YX; Wang, TF; Feng, ZT; Peng, K; Wang, J; Chen, S; Luo, YP; Li, RC; Yang, BW	FOOD CONTROL	English	Article	mcr-1 gene; Escherichia coli; Salmonella; Plasmid conjugation	RETAIL RAW POULTRY; ENTERICA SEROVAR; ANTIMICROBIAL RESISTANCE; MCR-1-HARBORING PLASMIDS; THERAPEUTIC OPTIONS; PREVALENCE; ENTEROBACTERIACEAE; SUSCEPTIBILITY; IDENTIFICATION; TYPHIMURIUM	To date, the genomic characterization of foodborne bacteria carrying the mobile colistin resistance gene mcr-1 and transferability of mcr-1-carrying plasmids between wild-type bacteria have not been studied in detail. We retrospectively investigated the prevalence of mcr-1-positive Salmonella and Escherichia coli isolated from retail food products, food supply chain, and clinical samples across C…	Northwest A&F University - China; Shijiazhuang University; Yangzhou University; Hong Kong Polytechnic University	83	ELSEVIER SCI LTD	OXFORD	FOOD CONTROL	2021	12	5.6	10.1016/j.foodcont.2021.108032	13	Food Science & Technology	/	WOS:000636447400005
Improving the Diagnosis of Bacterial Infections: Evaluation of 16S rRNA Nanopore Metagenomics in Culture-Negative Samples	Bouchiat, C; Ginevra, C; Benito, Y; Gaillard, T; Salord, H; Dauwalder, O; Laurent, F; Vandenesch, F	FRONTIERS IN MICROBIOLOGY	English	Article	metagenomics; bacterial infections; molecular diagnosis; Nanopore sequencing; 16S rRNA	PCR AMPLIFICATION; MOLECULAR DIAGNOSIS; IDENTIFICATION; ENDOCARDITIS	While 16S rRNA PCR-Sanger sequencing has paved the way for the diagnosis of culture-negative bacterial infections, it does not provide the composition of polymicrobial infections. We aimed to evaluate the performance of the Nanopore-based 16S rRNA metagenomic approach, using both partial and full-length amplification of the gene, and to explore its feasibility and suitability as a routine diagnos…	CHU Lyon; Universite Claude Bernard Lyon 1; Centre National de la Recherche Scientifique (CNRS); CNRS - National Institute for Biology (INSB); Institut National de la Sante et de la Recherche Medicale (Inserm); CHU Lyon	30	FRONTIERS MEDIA SA	LAUSANNE	FRONT MICROBIOL	2022	12	4	10.3389/fmicb.2022.943441	13	Microbiology	35910644	WOS:000833901900001
Tropheryma whipplei Detection by Nanopore Sequencing in Patients With Interstitial Lung Disease	Guo, YF; Li, LJ; Li, ZZ; Sun, LX; Wang, H	FRONTIERS IN MICROBIOLOGY	English	Article	Tropheryma whipplei; Nanopore; metagenomic next-generation sequencing; pneumonia; infection	DIAGNOSIS; INVOLVEMENT; PNEUMONIA; SOCIETY; ADULTS	Tropheryma whipplei is a bacterium associated with Whipple's disease, which commonly manifests as weight loss, arthralgia, and diarrhea. The most frequently involved organs comprise the heart and eyes, in addition to the central nervous system. Few studies have explored the relationship between T. whipplei and pneumonia. Herein, we report three patients with interstitial lung disease (ILD) of unk…	Peking University	29	FRONTIERS MEDIA SA	LAUSANNE	FRONT MICROBIOL	2021	12	4	10.3389/fmicb.2021.760696	6	Microbiology	34912314	WOS:000741896200001
Whole Genome Sequencing of Hepatitis A Virus Using a PCR-Free Single-Molecule Nanopore Sequencing Approach	Batista, FM; Stapleton, T; Lowther, JA; Fonseca, VG; Shaw, R; Pond, C; Walker, DI; van Aerle, R; Martinez-Urtaza, J	FRONTIERS IN MICROBIOLOGY	English	Article	hepatitis A virus; Picornaviridae; genome; nanopore sequencing; metagenomics; SNV	/	Hepatitis A virus (HAV) is one of the most common causes of acute viral hepatitis in humans. Although HAV has a relatively small genome, there are several factors limiting whole genome sequencing such as PCR amplification artefacts and ambiguities in de novo assembly. The recently developed Oxford Nanopore technologies (ONT) allows single-molecule sequencing of long-size fragments of DNA or RNA u…	Centre for Environment Fisheries & Aquaculture Science; Autonomous University of Barcelona	35	FRONTIERS MEDIA SA	LAUSANNE	FRONT MICROBIOL	2020	12	4	10.3389/fmicb.2020.00874	9	Microbiology	32523561	WOS:000540625500001
Emergence of B.1.1.318 SARS-CoV-2 viral lineage and high incidence of alpha B.1.1.7 variant of concern in the Republic of Gabon	Manouana, GP; Maloum, MN; Bikangui, R; Bingono, SOO; Nguema, GO; Honkpehedji, JY; Rossatanga, EG; Zoa-Assoumou, S; Pallerla, SR; Rachakonda, S; Mintsa, AN; Lekana-Douki, JB; Siawaya, JFD; Borrmann, S; Kremsner, PG; Lell, B; Velavan, TP; Adegnika, AA	INTERNATIONAL JOURNAL OF INFECTIOUS DISEASES	English	Article	SARS-CoV-2; B.1.1.318; Variant of concern; B.1.1.7; Transmission; Gabon; Central Africa; Oxford Nanopore; MinION	/	Objective: Variants of concern (VOCs) associated with relatively high transmissibility appear to be rapidly spreading in Gabon. Therefore, it is imperative to understand the distribution of several VOCs in the population, which could have implications for transmissibility and vaccine efficacy. Methods: Between February and May 2021, SARS-CoV-2 genomes were sequenced using the Oxford nanopore MinI…	Eberhard Karls University of Tubingen; Eberhard Karls University Hospital; German Center for Infection Research; Medical University of Vienna	11	ELSEVIER SCI LTD	OXFORD	INT J INFECT DIS	2022	12	4.8	10.1016/j.ijid.2021.10.057	4	Infectious Diseases	34742926	WOS:000807520900027
Combination random isothermal amplification and nanopore sequencing for rapid identification of the causative agent of an outbreak	Hansen, S; Faye, O; Sanabani, SS; Faye, M; Böhlken-Fascher, S; Faye, O; Sall, AA; Bekaert, M; Weidmann, M; Czerny, CP; Abd El Wahed, A	JOURNAL OF CLINICAL VIROLOGY	English	Article	Nanopore sequencing; Random isothermal amplification; Point of need diagnostics; Zika virus	REAL-TIME; VIRUS; SURVEILLANCE; GENOMICS; ASSAY; ZIKA	Background: Outbreaks of fever of unknown origin start with nonspecific symptoms and case definition is only slowly developed and adapted, therefore, identifying the causative agent is crucial to ensure suitable treatment and control measures. As an alternative method for Polymerase Chain Reaction in molecular diagnostics diagnostic, metagenomics can be applied to identify the pathogen responsibl…	University of Gottingen; Pasteur Network; Institut Pasteur Dakar; Universidade de Sao Paulo; University of Stirling	21	ELSEVIER SCIENCE BV	AMSTERDAM	J CLIN VIROL	2018	12	4	10.1016/j.jcv.2018.07.001	5	Virology	30015285	WOS:000442361000006
Nanopore sequencing: flourishing in its teenage years	Zhang, TY; Li, HZ; Jiang, M; Hou, HY; Gao, YY; Li, YL; Wang, FH; Wang, J; Peng, K; Liu, YX	JOURNAL OF GENETICS AND GENOMICS	English	Article	Nanopore sequencing; Long-read sequencing; Application; Accuracy; Outlook; Direct RNA sequencing; Metagenomics	GENOME; IDENTIFICATION; RNA; MOLECULES	Over the past decade, nanopore sequencing has experienced significant advancements and changes, transitioning from an initially emerging technology to a significant instrument in the field of genomic sequencing. However, as advancements in next-generation sequencing technology persist, nanopore sequencing also improves. This paper reviews the developments, applications, and outlook on nanopore se…	Chinese Academy of Agricultural Sciences; Agriculture Genomes Institute at Shenzhen, CAAS; Ministry of Agriculture & Rural Affairs; Yangzhou University	186	SCIENCE PRESS	BEIJING	J GENET GENOMICS	2024	12	6.6	10.1016/j.jgg.2024.09.007	14	Biochemistry & Molecular Biology; Genetics & Heredity	39293510	WOS:001377346200001
Enhancing genomics- based outbreak detection of endemic Salmonella enterica serovar Typhimurium using dynamic thresholds	Payne, M; Octavia, S; Luu, LDW; Sotomayor-Castillo, C; Wang, QN; Tay, ACY; Sintchenko, V; Tanaka, MM; Lan, RT	MICROBIAL GENOMICS	English	Article	genomic epidemiology; outbreak detection; Salmonella Typhimurium; bacterial population genomics; genetic clustering	TANDEM-REPEAT ANALYSIS; PUBLIC-HEALTH SURVEILLANCE; AUSTRALIA; ENGLAND; VERSION; TOOL	Salmonella enterica serovar Typhimurium is the leading cause of salmonellosis in Australia, and the ability to identify outbreaks and their sources is vital to public health. Here, we examined the utility of whole- genome sequencing (WGS), including complete genome sequencing with Oxford Nanopore technologies, in examining 105 isolates from an endemic multi- locus variable number tandem repeat an…	University of New South Wales Sydney; NSW Health; Westmead Hospital; University of Sydney; University of Sydney; University of Western Australia	33	MICROBIOLOGY SOC	LONDON	MICROB GENOMICS	2021	12	4	10.1099/mgen.0.000310	9	Genetics & Heredity; Microbiology	31682222	WOS:000659228700009
Horizontal Plasmid Transfer among Klebsiella pneumoniae Isolates Is the Key Factor for Dissemination of Extended-Spectrum β-Lactamases among Children in Tanzania	Pedersen, T; Tellevik, MG; Kommedal, O; Lindemann, PC; Moyo, SJ; Janice, J; Blomberg, B; Samuelsen, O; Langeland, N	MSPHERE	English	Article	CTX-M-15; HGT; IncFIIK5 plasmid; Klebsiella pneumoniae; whole-genome sequencing	RESISTANCE	Increased knowledge about the role of horizontal gene transfer is key to improve our understanding of the spread of antimicrobial resistance (AMR) in human populations. We therefore studied the dissemination of the bla(CTX-M-15) extended-spectrum-beta-lactamase (ESBL) gene in Klebsiella pneumoniae isolates obtained from stool samples from hospitalized children and healthy controls below 2 years o…	UiT The Arctic University of Tromso; University Hospital of North Norway; University of Bergen; Haukeland University Hospital; University of Bergen; Haukeland University Hospital; University of Bergen; Muhimbili University of Health & Allied Sciences; UiT The Arctic University of Tromso; UiT The Arctic University of Tromso	31	AMER SOC MICROBIOLOGY	WASHINGTON	MSPHERE	2020	12	3.7	10.1128/mSphere.00428-20	13	Microbiology	32669470	WOS:000568743200005
Haemophilus influenzae Meningitis Direct Diagnosis by Metagenomic Next-Generation Sequencing: A Case Report	Morsli, M; Kerharo, Q; Delerce, J; Roche, PH; Troude, L; Drancourt, M	PATHOGENS	English	Article	bacterial meningitis; point-of-care diagnostic; Haemophilus influenzae; Oxford Nanopore Technologies; real-time sequencing; metagenomic next-generation sequencing	/	Current routine real-time PCR methods used for the point-of-care diagnosis of infectious meningitis do not allow for one-shot genotyping of the pathogen, as in the case of deadly Haemophilus influenzae meningitis. Real-time PCR diagnosed H. influenzae meningitis in a 22-year-old male patient, during his hospitalisation following a more than six-metre fall. Using an Oxford Nanopore Technologies re…	Aix-Marseille Universite; Institut de Recherche pour le Developpement (IRD); Aix-Marseille Universite; Aix-Marseille Universite; Assistance Publique-Hopitaux de Marseille	8	MDPI	BASEL	PATHOGENS	2021	12	3.3	10.3390/pathogens10040461	5	Microbiology	33921275	WOS:000643379900001
Answers in hours: A prospective clinical study using nanopore sequencing for bile duct cultures	Yonkus, JA; Whittle, E; Alva-Ruiz, R; Abdelrahman, AM; Horsman, SE; Suh, GA; Cunningham, SA; Nelson, H; Grotz, TE; Smoot, RL; Cleary, SP; Nagorney, DM; Kendrick, ML; Patel, R; Truty, MJ; Chia, N	SURGERY	English	Article	/	SURGICAL SITE INFECTION; PANCREATICODUODENECTOMY; BACTEROBILIA; BACTEREMIA; IMPACT	Background: Surgical site infection is a major source of morbidity in patients undergoing pancreatic head resection and is often from organisms in intraoperative bile duct cultures. As such, many institutions use prolonged prophylactic antibiotics and tailor based on bile duct cultures. However, standard cultures take days, leaving many patients unnecessarily on prolonged antibiotics. Nanopore se…	Mayo Clinic; Mayo Clinic; Mayo Clinic; Mayo Clinic; Mayo Clinic; American College of Surgeons	40	MOSBY-ELSEVIER	NEW YORK	SURGERY	2022	12	3.2	10.1016/j.surg.2021.09.037	10	Surgery	34973809	WOS:000763349500020
Whole Genome Sequencing Reveals Virulence Potentials ofHelicobacter pyloriStrain KE21 Isolated from a Kenyan Patient with Gastric Signet Ring Cell Carcinoma	Mwangi, C; Njoroge, S; Tshibangu-Kabamba, E; Moloo, Z; Rajula, A; Devani, S; Matsumoto, T; Nyerere, K; Kariuki, S; Revathi, G; Yamaoka, Y	TOXINS	English	Article	Helicobacter pylori; Kenya; whole genome sequencing; virulence; virulome; mobilome; Illumina Miseq; Oxford Nanopore MinION	OUTER-MEMBRANE PROTEINS; HELICOBACTER-PYLORI; CAGA ONCOPROTEIN; DNA METHYLATION; AFRICAN ENIGMA; HOPQ ALLELES; E-CADHERIN; CANCER; INFECTION; DIFFUSE	Helicobacter pylori(H.pylori) infection is etiologically associated with severe diseases including gastric cancer; but its pathogenicity is deeply shaped by the exceptional genomic diversification and geographic variation of the species. The clinical relevance of strains colonizing Africa is still debated. This study aimed to explore genomic features and virulence potentials ofH. pyloriKE21, a ty…	Jomo Kenyatta University of Agriculture & Technology; Kenyatta University; Technical University of Kenya; Oita University; Kenya Medical Research Institute	91	MDPI	BASEL	TOXINS	2020	12	3.9	10.3390/toxins12090556	19	Food Science & Technology; Toxicology	32872465	WOS:000580301500001
Global mpox lineage discovery and rapid outbreak tracking with nanopore sequencing	Bosmeny, MS; White, AA; Pater, AA; Crew, J; Geltz, J; Gagnon, KT	VIROLOGY JOURNAL	English	Article	/	/	Insufficient tracking of virus introduction, spread, and new lineage emergence for the human monkeypox (mpox) virus 1 (hMPXV1) outbreak of 2022 hindered epidemiological studies and public health response. hMPXV1 mutations accumulated unexpectedly faster than predicted. Thus, new variants with altered pathogenicity could emerge and spread without early detection. Whole genome sequencing addresses …	Southern Illinois University System; Southern Illinois University; Southern Illinois University System; Southern Illinois University	15	BMC	LONDON	VIROL J	2023	12	4	10.1186/s12985-023-02059-2	10	Virology	37149667	WOS:000982647300001
Diagnosis of pathogens causing bacterial meningitis using Nanopore sequencing in a resource-limited setting	Pallerla, SR; Dong, DV; Linh, LTK; Son, TV; Quyen, DT; Hoan, PQ; Trung, NT; The, NT; Rüter, J; Boutin, S; Nurjadi, D; Sy, BT; Kremsner, PG; Meyer, CG; Song, LH; Velavan, TP	ANNALS OF CLINICAL MICROBIOLOGY AND ANTIMICROBIALS	English	Article	Nanopore; Bacterial meningitis; Vietnam; 16S rRNA; Next-generation sequencing; Diagnosis and pathogen genome	STREPTOCOCCUS-SUIS; INFECTION; MORTALITY	Aim The aim of the present study is to compare the performance of 16S rRNA Nanopore sequencing and conventional culture in detecting infectious pathogens in patients with suspected meningitis in a resource-limited setting without extensive bioinformatics expertise. Methods DNA was isolated from the cerebrospinal fluid (CSF) of 30 patients with suspected bacterial meningitis. The isolated DNA was …	Eberhard Karls University of Tubingen; Eberhard Karls University Hospital; Ruprecht Karls University Heidelberg; University of Lubeck	46	BMC	LONDON	ANN CLIN MICROB ANTI	2022	11	4.6	10.1186/s12941-022-00530-6	8	Microbiology	36064402	WOS:000850056700001
A comparison of four epidemic waves of COVID-19 in Malawi; an observational cohort study	Anscombe, C; Lissauer, S; Thole, H; Rylance, J; Dula, D; Menyere, M; Kutambe, B; van der Veer, C; Phiri, T; Banda, NP; Mndolo, KS; Mponda, K; Phiri, C; Mallewa, J; Nyirenda, M; Katha, G; Mwandumba, H; Gordon, SB; Jambo, KC; Cornick, J; Feasey, N; Barnes, KG; Morton, B; Ashton, PM	BMC INFECTIOUS DISEASES	English	Article	COVID; SARS-CoV-2; ISARIC; Delta; Mortality; LMIC; Malawi; Africa	VARIANT	BackgroundCompared to the abundance of clinical and genomic information available on patients hospitalised with COVID-19 disease from high-income countries, there is a paucity of data from low-income countries. Our aim was to explore the relationship between viral lineage and patient outcome.MethodsWe enrolled a prospective observational cohort of adult patients hospitalised with PCR-confirmed CO…	Liverpool School of Tropical Medicine; University of Liverpool; Harvard University; Harvard T.H. Chan School of Public Health; Harvard University; Massachusetts Institute of Technology (MIT); Broad Institute; University of Glasgow; University of Malawi; QUEEN ELIZABETH CENTRAL HOSPITAL; University of Liverpool	34	BMC	LONDON	BMC INFECT DIS	2023	11	3.4	10.1186/s12879-022-07941-y	9	Infectious Diseases	36750921	WOS:000929062200004
COVID-19: first long-term care facility outbreak in the Netherlands following cross-border introduction from Germany, March 2020	van Hensbergen, M; den Heijer, CDJ; Wolffs, P; Hackert, V; ter Waarbeek, HLG; Munnink, BBO; Sikkema, RS; Heddema, ER; Hoebe, CJPA	BMC INFECTIOUS DISEASES	English	Article	Coronavirus; SARS-CoV-2; Whole genome sequencing; Cross-sectional; Observational; Nursing home; Infection control	/	BackgroundThe Dutch province of Limburg borders the German district of Heinsberg, which had a large cluster of COVID-19 cases linked to local carnival activities before any cases were reported in the Netherlands. However, Heinsberg was not included as an area reporting local or community transmission per the national case definition at the time. In early March, two residents from a long-term care…	Maastricht University; Maastricht University; Maastricht University Medical Centre (MUMC); Erasmus University Rotterdam; Erasmus MC	30	BMC	LONDON	BMC INFECT DIS	2021	11	3.4	10.1186/s12879-021-06093-9	11	Infectious Diseases	33947332	WOS:000651474800009
MinION, a portable long-read sequencer, enables rapid vaginal microbiota analysis in a clinical setting	Komiya, S; Matsuo, Y; Nakagawa, S; Morimoto, Y; Kryukov, K; Okada, H; Hirota, K	BMC MEDICAL GENOMICS	English	Article	16S rRNA; Bacterial vaginosis; Long-read sequencer; MinION; Nanopore	BACTERIAL VAGINOSIS; INFECTION; UNIFRAC	Background It has been suggested that the local microbiota in the reproductive organs is relevant to women's health and may also affect pregnancy outcomes. Analysis of partial 16S ribosomal RNA (rRNA) gene sequences generated by short-read sequencers has been used to identify vaginal and endometrial microbiota, but it requires a long time to obtain the results, making it unsuitable for rapid bact…	Kansai Medical University; Kansai Medical University; Tokai University; Research Organization of Information & Systems (ROIS); National Institute of Genetics (NIG) - Japan	35	BMC	LONDON	BMC MED GENOMICS	2022	11	2.1	10.1186/s12920-022-01218-8	10	Genetics & Heredity	35337329	WOS:000773255700002
Comparative genome analysis of multidrug-resistant Pseudomonas aeruginosa JNQH-PA57, a clinically isolated mucoid strain with comprehensive carbapenem resistance mechanisms	Hao, MJ; Ma, WS; Dong, XT; Li, XF; Cheng, F; Wang, YJ	BMC MICROBIOLOGY	English	Article	Complete genome sequencing; Pseudomosa aeruginosa; Mucoid strain; Alginates-overproducing; Carbapenem resistance mechanisms	PATHOGENICITY ISLAND PAPI-1; EFFLUX PUMPS; ANTIBIOTIC-RESISTANCE; ANALYSIS REVEALS; PORIN OPRD; SEQUENCE; IMIPENEM; VIRULENCE; IMPACT; OVERPRODUCTION	Background The prevalence of clinical multidrug-resistant (MDR) Pseudomonas aeruginosa has been increasing rapidly worldwide over the years and responsible for a wide range of acute and chronic infections with high mortalities. Although hundreds of complete genomes of clinical P. aeruginosa isolates have been sequenced, only a few complete genomes of mucoid strains are available, limiting a compr…	Shandong First Medical University & Shandong Academy of Medical Sciences; Shandong First Medical University & Shandong Academy of Medical Sciences	74	BMC	LONDON	BMC MICROBIOL	2021	11	4	10.1186/s12866-021-02203-4	16	Microbiology	33932986	WOS:000647640300001
A dual-process of targeted and unbiased Nanopore sequencing enables accurate and rapid diagnosis of lower respiratory infections	Guo, YF; Li, ZZ; Li, LJ; Li, S; Sun, LX; Yang, XF; Dai, Y; Gu, J; Yang, L; Liu, X; Lu, BH; Han, JJ; Chang, K; Gu, L; Yin, YY; Sun, SJ; Jing, CD; Chen, HB; Liu, MJ; Xu, H; Liu, RY; Ren, Y; Guo, H; Wang, H	EBIOMEDICINE	English	Article	Nanopore sequencing; Metagenomics; Target amplification; Lower respiratory infections; Machine learning	DISEASES SOCIETY; PNEUMONIA; ADULTS	Background Nanopore metagenomics has been used for infectious disease diagnosis for bacterial pathogens. How-ever, this technology currently lacks comprehensive performance studies in clinical settings for simultaneous detection of bacteria, fungi, and viruses.Methods We developed a dual-process of Nanopore sequencing for one sample, with unbiased metagenomics in Meta process and target enrichmen…	Peking University; Peking University; China-Japan Friendship Hospital; Capital Medical University; Capital Medical University; Peking University	20	ELSEVIER	AMSTERDAM	EBIOMEDICINE	2023	11	9.7	10.1016/j.ebiom.2023.104858	12	General & Internal Medicine; Research & Experimental Medicine	37925777	WOS:001110539800001
A comparison of five Illumina, Ion Torrent, and nanopore sequencing technology-based approaches for whole genome sequencing of SARS-CoV-2	Carbo, EC; Mourik, K; Boers, SA; Munnink, BO; Nieuwenhuijse, D; Jonges, M; Welkers, MRA; Matamoros, S; Slooten, JVT; Kraakman, MEM; Karelioti, E; van der Meer, D; Veldkamp, KE; Kroes, ACM; Sidorov, I; de Vries, JJC	EUROPEAN JOURNAL OF CLINICAL MICROBIOLOGY & INFECTIOUS DISEASES	English	Article	Whole genome sequencing; SARS-CoV-2; Benchmark	ASSOCIATION	Rapid identification of the rise and spread of severe acute respiratory syndrome coronavirus 2 (SARS-CoV-2) variants of concern remains critical for monitoring of the efficacy of diagnostics, therapeutics, vaccines, and control strategies. A wide range of SARS-CoV-2 next-generation sequencing (NGS) methods have been developed over the last years, but cross-sequence technology benchmarking studies…	Leiden University; Leiden University Medical Center (LUMC); Erasmus University Rotterdam; Erasmus MC; University of Amsterdam	59	SPRINGER	NEW YORK	EUR J CLIN MICROBIOL	2023	11	3.7	10.1007/s10096-023-04590-0	13	Infectious Diseases; Microbiology	37017810	WOS:000963626700001
Convergence of MCR-8.2 and Chromosome-Mediated Resistance to Colistin and Tigecycline in an NDM-5-Producing ST656 Klebsiella pneumoniae Isolate From a Lung Transplant Patient in China	Zhao, JK; Li, ZY; Zhang, YL; Liu, XM; Lu, BH; Bin, C	FRONTIERS IN CELLULAR AND INFECTION MICROBIOLOGY	English	Article	Klebsiella pneumoniae; blaNDM-5; mcr-8.2; colistin; tigecycline	ESCHERICHIA-COLI; BETA-LACTAMASE; MECHANISMS; SUSCEPTIBILITY; PLASMIDS; RAMA	We characterized the first NDM- 5 and MCR- 8.2 co- harboring ST656 Klebsiella pneumoniae clinical isolate, combining with chromosomal gene-mediated resistance to colistin and tigecycline. The K. pneumoniae KP32558 was isolated from the bronchoalveolar lavage fluid from a lung transplant patient. Complete genome sequences were obtained through Illumina HiSeq sequencing and nanopore sequencing. The…	China-Japan Friendship Hospital; Chinese Academy of Medical Sciences - Peking Union Medical College; Peking Union Medical College; Peking University; Tsinghua University; Capital Medical University	50	FRONTIERS MEDIA SA	LAUSANNE	FRONT CELL INFECT MI	2022	11	4.6	10.3389/fcimb.2022.922031	10	Immunology; Microbiology	35899054	WOS:000884319200001
Whole Genome Assembly of Human Papillomavirus by Nanopore Long-Read Sequencing	Yang, SB; Zhao, QQ; Tang, LH; Chen, ZJ; Wu, ZT; Li, KX; Lin, RR; Chen, Y; Ou, DL; Zhou, L; Xu, JZ; Qin, QS	FRONTIERS IN GENETICS	English	Article	HPV; nanopore sequencing; cervical cancer; integration; episomal genome	CERVICAL INTRAEPITHELIAL NEOPLASIA; VIRAL LOAD; INTEGRATION SITES; PHYSICAL STATUS; HPV INTEGRATION; VIRUS GENOMES; CANCER; DNA; EXPRESSION; CARCINOMA	Human papillomavirus (HPV) is a causal agent for most cervical cancers. The physical status of the HPV genome in these cancers could be episomal, integrated, or both. HPV integration could serve as a biomarker for clinical diagnosis, treatment, and prognosis. Although whole-genome sequencing by next-generation sequencing (NGS) technologies, such as the Illumina sequencing platform, have been used…	Shantou University; Shantou University; Shantou University; Shantou University	74	FRONTIERS MEDIA SA	LAUSANNE	FRONT GENET	2022	11	2.8	10.3389/fgene.2021.798608	11	Genetics & Heredity	35058971	WOS:000745206100001
QitanTech Nanopore Long-Read Sequencing Enables Rapid Resolution of Complete Genomes of Multi-Drug Resistant Pathogens	Peng, K; Yin, Y; Li, Y; Qin, SS; Liu, Y; Yang, XR; Wang, ZQ; Li, RC	FRONTIERS IN MICROBIOLOGY	English	Article	antimicrobial resistance; microbial genomics; long-read sequencing; multi-drug resistant (MDR) bacteria; QitanTech sequencing	DNA; TOOL	Advancement of novel sequencing technologies facilitates modern life science and medicine unprecedentedly. Exploring complete genome sequences of bacteria by long-read sequencing technology is significant for microbial genomics research. However, third-generation long-read sequencing technologies are available with limited choices, which generate technological barrier to scientific research. Rece…	Yangzhou University; Yangzhou University; Zhengzhou University	55	FRONTIERS MEDIA SA	LAUSANNE	FRONT MICROBIOL	2022	11	4	10.3389/fmicb.2022.778659	14	Microbiology	35401428	WOS:000788876700001
Emergence of IMP-8-Producing Comamonas thiooxydans Causing Urinary Tract Infection in China	Guo, XB; Wang, Q; Xu, H; He, XH; Guo, LH; Liu, SX; Wen, PP; Gou, JJ	FRONTIERS IN MICROBIOLOGY	English	Article	bla(IMP-8); antimicrobial resistance; complete genome sequence; comparative genomic analysis; Comamonas thiooxydans	/	The emergence of carbapenem resistance (CR) caused by hydrolytic enzymes called carbapenemases has become a major concern worldwide. So far, CR genes have been widely detected in various bacteria. However, there is no report of CR gene harboring Comamonas thiooxydans. We first isolated a strain of an IMP-8-producing C. thiooxydans from a patient with urinary tract infection in China. Species iden…	Zhengzhou University; Zhejiang University; Zhengzhou University	30	FRONTIERS MEDIA SA	LAUSANNE	FRONT MICROBIOL	2021	11	4	10.3389/fmicb.2021.585716	6	Microbiology	33790873	WOS:000634101800001
Genomic Sequencing from Sputum for Tuberculosis Disease Diagnosis, Lineage Determination, and Drug Susceptibility Prediction	Nilgiriwala, K; Rabodoarivelo, MS; Hall, MB; Patel, G; Mandal, A; Mishra, S; Andrianomanana, FR; Dingle, K; Rodger, G; George, S; Crook, DW; Hoosdally, S; Mistry, N; Rakotosamimanana, N; Iqbal, Z; Lapierre, SG; Walker, TM	JOURNAL OF CLINICAL MICROBIOLOGY	English	Article	antimicrobial resistance; methods development; molecular epidemiology; tuberculosis; whole-genome sequencing	RESISTANT TUBERCULOSIS	Universal access to drug susceptibility testing for newly diagnosed tuberculosis patients is recommended. Access to culture-based diagnostics remains limited, and targeted molecular assays are vulnerable to emerging resistance mutations. Universal access to drug susceptibility testing for newly diagnosed tuberculosis patients is recommended. Access to culture-based diagnostics remains limited, an…	Pasteur Network; Institut Pasteur Madagascar; European Molecular Biology Laboratory (EMBL); European Bioinformatics Institute; University of Melbourne; Peter Doherty Institute; University of Oxford; Universite de Montreal; Universite de Montreal; University of Oxford	21	AMER SOC MICROBIOLOGY	WASHINGTON	J CLIN MICROBIOL	2023	11	6.1	10.1128/jcm.01578-22	13	Microbiology	36815861	WOS:000937484700001
Comparative genomics of 26 complete circular genomes of 18 different serotypes of Actinobacillus pleuropneumoniae	Donà, V; Ramette, A; Perreten, V	MICROBIAL GENOMICS	English	Article	porcine pleuropneumonia; WGS; ONT; serotype; LPS; CPS	CAPSULAR POLYSACCHARIDE; SEQUENCE-ANALYSIS; VIRULENCE; SEROVARS; SURVEILLANCE; RESISTANCE; PLASMIDS; VACCINES; STRAINS; TOXINS	Actinobacillus pleuropneumoniae is a Gram-negative, rod-shaped bacterium of the family Pasteurellaceae causing pig pleuropneumonia associated with great economic losses worldwide. Nineteen serotypes with distinctive lipopolysaccharide (LPS) and capsular (CPS) compositions have been described so far, yet complete circular genomes are publicly available only for the reference strains of serotypes 1…	University of Bern; University of Bern	56	MICROBIOLOGY SOC	LONDON	MICROB GENOMICS	2022	11	4	10.1099/mgen.0.000776	12	Genetics & Heredity; Microbiology	35196217	WOS:000764885600003
Analysis of a small outbreak of Shiga toxin- producing Escherichia coli O157:H7 using long- read sequencing	Greig, DR; Jenkins, C; Gharbia, SE; Dallman, TJ	MICROBIAL GENOMICS	English	Article	*Correspondence; Jenkins; Claire; Jenkins1@phe; gov; uk Bacteriophage; Escherichia coli O157; H7; Illumina; Nanopore; Shiga toxin; Whole Genome sequencing	GENOME; ENGLAND; VERSION	Compared to short read sequencing data, long read sequencing facilitates single contiguous de novo assemblies and characterization of the prophage region of the genome. Here, we describe our methodological approach to using Oxford Nanopore Technology (ONT) sequencing data to quantify genetic relatedness and to look for microevolutionary events in the core and accessory genomes to assess the withi…	Public Health England; UK Research & Innovation (UKRI); Biotechnology and Biological Sciences Research Council (BBSRC); Roslin Institute; University of Edinburgh; University of Edinburgh	40	MICROBIOLOGY SOC	LONDON	MICROB GENOMICS	2021	11	4	10.1099/mgen.0.000545	10	Genetics & Heredity; Microbiology	33683192	WOS:000636433000007
Identifying Bacterial Airways Infection in Stable Severe Asthma Using Oxford Nanopore Sequencing Technologies	Jabeen, MF; Sanderson, ND; Foster, D; Crook, DW; Cane, JL; Borg, C; Connolly, C; Thulborn, S; Pavord, ID; Klenerman, P; Street, TL; Hinks, TSC	MICROBIOLOGY SPECTRUM	English	Article	asthma; bacteria; Haemophilus influenzae; Illumina; microbiome; Oxford Nanopore; sputum	HAEMOPHILUS-INFLUENZAE; MICROBIOME; INNATE	Previous metagenomic studies in asthma have been limited by inadequate sequencing depth for species-level bacterial identification and by heterogeneity in clinical phenotyping. We hypothesize that chronic bacterial airways infection is a key treatable trait whose prevalence, clinical phenotype and reliable biomarkers need definition. In this study, we have applied a method for Oxford Nanopore seq…	University of Oxford; University of Oxford; University of Oxford; University of Oxford; University of Oxford	41	AMER SOC MICROBIOLOGY	WASHINGTON	MICROBIOL SPECTR	2022	11	3.7	10.1128/spectrum.02279-21	14	Microbiology	35323032	WOS:000835142100174
Analysis of Lung Microbiome in COVID-19 Patients during Time of Hospitalization	Xie, LL; Chen, LJ; Li, XR; Zhou, JY; Tian, HP; Zhao, J; Li, ZQ; Li, YR	PATHOGENS	English	Article	COVID-19; SARS-CoV-2; lung microbiota; nanopore sequencing	ACINETOBACTER-BAUMANNII INFECTION; IMPACT	Background: Severe acute respiratory syndrome coronavirus 2 (SARS-CoV-2), which is the pathogenic agent of the rapidly spreading pneumonia called coronavirus disease 2019 (COVID-19), primarily infects the respiratory and digestive tract. Several studies have indicated the alterations of the bacterial microbiome in the lower respiratory tract during viral infection. However, both bacterial and fun…	Wuhan University; Wuhan University; Chinese Academy of Medical Sciences - Peking Union Medical College	48	MDPI	BASEL	PATHOGENS	2023	11	3.3	10.3390/pathogens12070944	16	Microbiology	37513791	WOS:001036469100001
Comparison of different sequencing techniques for identification of SARS-CoV-2 variants of concern with multiplex real-time PCR	Ranasinghe, D; Jayadas, TTP; Jayathilaka, D; Jeewandara, C; Dissanayake, O; Guruge, D; Ariyaratne, D; Gunasinghe, D; Gomes, L; Wijesinghe, A; Wijayamuni, R; Malavige, GN	PLOS ONE	English	Article	/	/	As different SARS-CoV-2 variants emerge and with the continuous evolvement of sub lineages of the delta variant, it is crucial that all countries carry out sequencing of at least >1% of their infections, in order to detect emergence of variants with higher transmissibility and with ability to evade immunity. However, due to limited resources as many resource poor countries are unable to sequence …	University Sri Jayewardenepura	25	PUBLIC LIBRARY SCIENCE	SAN FRANCISCO	PLOS ONE	2022	11	2.9	10.1371/journal.pone.0265220	12	Science & Technology - Other Topics	35377884	WOS:000860451200006
Real-time SARS-CoV-2 diagnostic and variants tracking over multiple candidates using nanopore DNA sequencing	Stüder, F; Petit, JL; Engelen, S; Mendoza-Parra, MA	SCIENTIFIC REPORTS	English	Article	/	/	Since December 2019, a novel coronavirus responsible for a severe acute respiratory syndrome (SARS-CoV-2) is accountable for a major pandemic situation. The emergence of the B.1.1.7 strain, as a highly transmissible variant has accelerated the world-wide interest in tracking SARS-CoV-2 variants' occurrence. Similarly, other extremely infectious variants, were described and further others are expe…	Universite Paris Saclay; CEA; Centre National de la Recherche Scientifique (CNRS); CEA; Universite Paris Saclay	14	NATURE PORTFOLIO	BERLIN	SCI REP-UK	2021	11	3.8	10.1038/s41598-021-95563-w	11	Science & Technology - Other Topics	34354202	WOS:000684433100009
Genomic Diversity of NDM-Producing Klebsiella Species from Brazil, 2013-2022	Camargo, CH; Yamada, AY; de Souza, AR; Reis, AD; Santos, MBN; de Assis, DB; de Carvalho, E; Takagi, EH; Cunha, MPV; Tiba-Casas, MR	ANTIBIOTICS-BASEL	English	Article	Klebsiella; whole genome sequencing; MLST; CG258; NDM-1; NDM-7; Illumina; MinIon; ONT; polymyxin B	ANTIMICROBIAL RESISTANCE; ENTEROBACTERIACEAE; SURVEILLANCE; PNEUMONIAE; EMERGENCE	Background: Since its first report in the country in 2013, NDM-producing Enterobacterales have been identified in all the Brazilian administrative regions. In this study, we characterized by antimicrobial susceptibility testing and by molecular typing a large collection of NDM-producing Klebsiella isolates from different hospitals in Brazil, mainly from the state of Sao Paulo, over the last decad…	Instituto Adolfo Lutz; Universidade de Sao Paulo; Instituto Adolfo Lutz; Instituto Butantan; Instituto Adolfo Lutz; Universidade de Sao Paulo	29	MDPI	BASEL	ANTIBIOTICS-BASEL	2022	10	4.3	10.3390/antibiotics11101395	9	Infectious Diseases; Pharmacology & Pharmacy	36290053	WOS:000872127200001
Impact of prophylactic and 'rescue pack' antibiotics on the airway microbiome in chronic lung disease	Rofael, SAD; Brown, J; Lipman, MC; Lowe, DM; Spratt, D; Quaderi, S; Hurst, JR; McHugh, TD	BMJ OPEN RESPIRATORY RESEARCH	English	Article	bacterial infection; bronchiectasis; COPD exacerbations; respiratory infection	CYSTIC FIBROSIS BRONCHIECTASIS; AZITHROMYCIN MAINTENANCE TREATMENT; LOW-DOSE ERYTHROMYCIN; LONG-TERM; DOUBLE-BLIND; MACROLIDE TREATMENT; FUNCTION DECLINE; EXACERBATIONS; RESISTANT; BACTERIA	The management of many chronic lung diseases involves multiple antibiotic prescriptions either to treat acute exacerbations or as prophylactic therapy to reduce the frequency of exacerbations and improve patients' quality of life.AimTo investigate the effects of antibiotics on the homeostasis of bacterial communities in the airways, and how this may contribute to antimicrobial resistance (AMR) am…	University of London; University College London; Egyptian Knowledge Bank (EKB); Alexandria University; University of London; University College London; University of London; University College London; University of London; University College London	46	BMJ PUBLISHING GROUP	LONDON	BMJ OPEN RESPIR RES	2023	10	3.7	10.1136/bmjresp-2022-001335	11	Respiratory System	37085283	WOS:000982748900001
Classification of salivary bacteriome in asymptomatic COVID-19 cases based on long-read nanopore sequencing	Jitvaropas, R; Mayuramart, O; Sawaswong, V; Kaewsapsak, P; Payungporn, S	EXPERIMENTAL BIOLOGY AND MEDICINE	English	Article	SARS-CoV-2; full-length; 16S rRNA; microbiota; oral bacteriome; MinION	DIALISTER-PNEUMOSINTES; ORAL MICROBIOME; GRANULICATELLA; DISEASE; HEALTH	The coronavirus (COVID-19) global pandemic has impacted the health of almost everyone, including changes in their salivary microbiota. Since 2019, there has been an increase in the number of new COVID-19 cases in Thailand. Therefore, COVID-19 active case finding is important for early detection and epidemic control. Moreover, the dynamic changes of salivary bacteriome in asymptomatic COVID-19 cas…	Thammasat University; Chulalongkorn University; Chulalongkorn University; Chulalongkorn University	57	FRONTIERS MEDIA SA	LAUSANNE	EXP BIOL MED	2022	10	2.8	10.1177/15353702221118091	10	Research & Experimental Medicine	36082397	WOS:000852329600001
Optimising Treatment Outcomes for Children and Adults Through Rapid Genome Sequencing of Sepsis Pathogens. A Study Protocol for a Prospective, Multi-Centre Trial (DIRECT)	Irwin, AD; Coin, LJM; Harris, PNA; Cotta, MO; Bauer, MJ; Buckley, C; Balch, R; Kruger, P; Meyer, J; Shekar, K; Brady, K; Fourie, C; Sharp, N; Vlad, L; Whiley, D; Beatson, SA; Forde, BM; Paterson, D; Clark, J; Hajkowicz, K; Raman, S; Bialasiewicz, S; Lipman, J; Schlapbach, LJ; Roberts, JA	FRONTIERS IN CELLULAR AND INFECTION MICROBIOLOGY	English	Article	antimicrobials; nanopore sequencing; antimicrobial resistance; sepsis diagnostics; personalised dosing; trial protocol	GLOBAL BURDEN; SEPTIC SHOCK; MORTALITY	Background Sepsis contributes significantly to morbidity and mortality globally. In Australia, 20,000 develop sepsis every year, resulting in 5,000 deaths, and more than AUD$846 million in expenditure. Prompt, appropriate antibiotic therapy is effective in improving outcomes in sepsis. Conventional culture-based methods to identify appropriate therapy have limited yield and take days to complete.…	University of Queensland; Childrens Health Queensland Hospital & Health Service; Queensland Childrens Hospital; University of Melbourne; Peter Doherty Institute; University of Queensland; Princess Alexandra Hospital; Prince Charles Hospital; Royal Brisbane & Women's Hospital; Childrens Health Queensland Hospital & Health Service; Queensland Childrens Hospital; University of Queensland; University…	21	FRONTIERS MEDIA SA	LAUSANNE	FRONT CELL INFECT MI	2021	10	4.6	10.3389/fcimb.2021.667680	8	Immunology; Microbiology	34249774	WOS:000670239100001
Gut microbiome profiling of neonates using Nanopore MinION and Illumina MiSeq sequencing	Cha, THY; Kim, HH; Keum, J; Kwak, MJ; Park, JY; Hoh, JK; Kim, CR; Jeon, BH; Park, HK	FRONTIERS IN MICROBIOLOGY	English	Article	gut microbiome; neonates; Illumina MiSeq (R); Nanopore MinION; preterm infants	INTESTINAL MICROBIOTA; ANTIBIOTIC EXPOSURE; PRETERM INFANTS; DELIVERY MODE; DIVERSITY; BACTERIA; PRIMERS; SEPSIS	This study aimed to evaluate the difference in gut microbiomes between preterm and term infants using third-generation long-read sequencing (Oxford Nanopore Technologies, ONT) compared with an established gold standard, Illumina (second-generation short-read sequencing). A total of 69 fecal samples from 51 term (T) and preterm (P) infants were collected at 7 and 28 days of life. Gut colonization …	Hanyang University; Hanyang University; Hanyang University; Seoul National University (SNU); Seoul National University (SNU)	79	FRONTIERS MEDIA SA	LAUSANNE	FRONT MICROBIOL	2023	10	4	10.3389/fmicb.2023.1148466	13	Microbiology	37256051	WOS:000996057900001
Rapid PCR-Based Nanopore Adaptive Sequencing Improves Sensitivity and Timeliness of Viral Clinical Detection and Genome Surveillance	Lin, YF; Dai, Y; Liu, YQ; Ren, ZL; Guo, H; Li, ZZ; Li, JH; Wang, KY; Yang, L; Zhang, S; Liu, HB; Jia, LL; Ni, M; Li, P; Song, HB	FRONTIERS IN MICROBIOLOGY	English	Article	nanopore sequencing; adaptive sequencing; human adenovirus; SARS-CoV-2; pathogen detection	REAL-TIME	Nanopore sequencing has been widely used for the real-time detection and surveillance of pathogens with portable MinION. Nanopore adaptive sequencing can enrich on-target sequences without additional pretreatment. In this study, the performance of adaptive sequencing was evaluated for viral genome enrichment of clinical respiratory samples. Ligation-based nanopore adaptive sequencing (LNAS) and r…	Academy of Military Medical Sciences - China; Chinese Academy of Agricultural Sciences	32	FRONTIERS MEDIA SA	LAUSANNE	FRONT MICROBIOL	2022	10	4	10.3389/fmicb.2022.929241	8	Microbiology	35783376	WOS:000886512600001
Viral oncogenes, viruses, and cancer: a third-generation sequencing perspective on viral integration into the human genome	Ye, RC; Wang, A; Bu, B; Luo, PX; Deng, WJ; Zhang, XY; Yin, SY	FRONTIERS IN ONCOLOGY	English	Review	viral integration; cancer sequencing; third generation sequencing; nanopore; PacBio	STRUCTURAL VARIATION; SINGLE-MOLECULE; HEPATITIS-B; HPV STATUS; IMMUNOBIOLOGY; TECHNOLOGIES; TRANSCRIPTS	The link between viruses and cancer has intrigued scientists for decades. Certain viruses have been shown to be vital in the development of various cancers by integrating viral DNA into the host genome and activating viral oncogenes. These viruses include the Human Papillomavirus (HPV), Hepatitis B and C Viruses (HBV and HCV), Epstein-Barr Virus (EBV), and Human T-Cell Leukemia Virus (HTLV-1), wh…	Yeshiva University; Montefiore Medical Center; Albert Einstein College of Medicine; State University of New York (SUNY) System; Stony Brook University; Huazhong University of Science & Technology; Harvard University; Harvard University Medical Affiliates; Massachusetts General Hospital; Harvard Medical School; Nanchang University	75	FRONTIERS MEDIA SA	LAUSANNE	FRONT ONCOL	2023	10	3.5	10.3389/fonc.2023.1333812	7	Oncology	38188304	WOS:001135642600001
National genomic epidemiology investigation revealed the spread of carbapenem-resistant Escherichia coli in healthy populations and the impact on public health	Li, Y; Zhang, YY; Sun, XR; Wu, YC; Yan, ZL; Ju, XY; Huang, YL; Zhou, HW; Wang, ZQ; Wang, SL; Zhang, R; Li, RC	GENOME MEDICINE	English	Article	Healthy populations; Carbapenem resistance; E. coli; Plasmids; Diverse clones	ENTEROBACTERIACEAE; EVOLUTION; STRAINS; NDM-5	Background Carbapenem-resistant Escherichia coli (CREC) has been considered as WHO priority pathogens, causing a great public health concern globally. While CREC from patients has been thoroughly investigated, the prevalence and underlying risks of CREC in healthy populations have been overlooked. Systematic research on the prevalence of CREC in healthy individuals was conducted here. We aimed to…	Yangzhou University; Zhejiang University; China Agricultural University; Yangzhou University; Yangzhou University	53	BMC	LONDON	GENOME MED	2024	10	10.4	10.1186/s13073-024-01310-x	11	Genetics & Heredity	38627827	WOS:001204514200002
Emergence of vanA-Type Vancomycin-Resistant Enterococcus faecium ST 78 Strain with a rep2-Type Plasmid Carrying a Tn 1546-Like Element Isolated from a Urinary Tract Infection in China	Sun, L; Xu, J; Wang, WZ; He, F	INFECTION AND DRUG RESISTANCE	English	Article	Enterococcus faecium; vancomycin-resistant enterococci; vanA; whole-genome sequencing; Tn 1546-like element	MOLECULAR CHARACTERIZATION; TRANSPOSON; VIRULENCE; TN1546	Purpose: The emergence of vancomycin-resistant enterococci (VRE) dramatically narrows therapeutic options. Although the prevalence of VRE in China has maintained a low level, VRE outbreaks have been reported in some tertiary hospitals in the developed areas of China. The clonal background of vanA-positive Enterococcus faecium strains has not been well characterized in China. Here, we report the w…	Zhejiang Academy of Medical Sciences; Hangzhou Medical College; Hangzhou Medical College; Zhejiang Provincial People's Hospital	31	DOVE MEDICAL PRESS LTD	ALBANY	INFECT DRUG RESIST	2020	10	2.9	10.2147/IDR.S247569	7	Infectious Diseases; Pharmacology & Pharmacy	32308438	WOS:000522983700001
First identification of blaNDM-5 producing Escherichia coli from neonates and a HIV infected adult in Tanzania	Manyahi, J; Moyo, SJ; Kibwana, U; Goodman, RN; Allman, E; Hubbard, ATM; Blomberg, B; Langeland, N; Roberts, AP	JOURNAL OF MEDICAL MICROBIOLOGY	English	Article	blaNDM-5; E. coli; neonates; HIV; Tanzania	METALLO-BETA-LACTAMASE; CARBAPENEMASE GENES; INCX3 PLASMID; DISSEMINATION; EMERGENCE; ISOLATE; NDM-5	Introduction. Carbapenem-resistant members of the family Enterobacteriaceae are emerging as a global public-health threat and cause substantial challenges in clinical practice. Gap Statement. There is a need for increased and continued genomic surveillance of antimicrobial resistance genes globally in order to detect outbreaks and dissemination of clinically important resistance genes and their a…	University of Bergen; Muhimbili University of Health & Allied Sciences; University of Bergen; Haukeland University Hospital; Liverpool School of Tropical Medicine; Nottingham Trent University	50	MICROBIOLOGY SOC	LONDON	J MED MICROBIOL	2022	10	2.4	10.1099/jmm.0.001513	11	Microbiology	35225760	WOS:000765551600009
Surveillance, isolation and genomic characterization of Pteropine orthoreovirus of probable bat origin among patients with acute respiratory infection in Malaysia	Tee, KK; Chan, PQ; Loh, AMK; Singh, S; Teo, CH; Iyadorai, T; Chook, JB; Ng, KT; Takebe, Y; Chan, KG; Sam, IC; Voon, K	JOURNAL OF MEDICAL VIROLOGY	English	Article	acute respiratory infection; fruit bats; Melaka virus; Nanopore sequencing; Pteropine orthoreovirus (PRV); Pulau virus; reassortment; zoonotic virus	SEROLOGICAL EVIDENCE; FRUIT BATS; DISEASE; VIRUS	Pteropine orthoreovirus (PRV), an emerging bat-borne virus, has been linked to cases of acute respiratory infections (ARI) in humans. The prevalence, epidemiology and genomic diversity of PRV among ARI of unknown origin were studied. Among 632 urban outpatients tested negative for all known respiratory viruses, 2.2% were PRV-positive. Patients mainly presented with moderate to severe forms of cou…	Universiti Malaya; Sunway University; Kementerian Kesihatan Malaysia; International Medical University Malaysia; Universiti Malaya; Agency for Science Technology & Research (A*STAR); A*STAR - Institute of Molecular & Cell Biology (IMCB); Japan Institute for Health Security (JIHS); National Institute of Infectious Diseases (NIID); Universiti Malaya; Jiangsu University; University of Nottingham Mal…	34	WILEY	HOBOKEN	J MED VIROL	2023	10	6.8	10.1002/jmv.28520	11	Virology	36691929	WOS:001034949300070
Carriage prevalence and genomic epidemiology of Staphylococcus aureus among Native American children and adults in the Southwestern USA	Cella, E; Sutcliffe, CG; Tso, C; Paul, E; Ritchie, N; Colelay, J; Denny, E; Grant, LR; Weatherholtz, RC; Hammitt, LL; Azarian, T	MICROBIAL GENOMICS	English	Article	carriage; genome epidemiology; Native American; phylogeny; Staphylococcus aureus	SOFT-TISSUE INFECTIONS; NASAL CARRIAGE; RISK-FACTORS; COLONIZATION; THROAT; SKIN; DISCORDANCE; NOSE; MRSA	Native American individuals in the Southwestern USA experience a higher burden of invasive Staphylococcus aureus disease than the general population. However, little is known about S. aureus carriage in these communities. A cross--sectional study was conducted to determine the carriage prevalence, risk factors and genomic epidemiology of S. aureus among Native American children (<5 years, n=121) …	State University System of Florida; University of Central Florida; Johns Hopkins University; Johns Hopkins Bloomberg School of Public Health; Pfizer; Pfizer USA	57	MICROBIOLOGY SOC	LONDON	MICROB GENOMICS	2022	10	4	10.1099/mgen.0.000806	14	Genetics & Heredity; Microbiology	35551692	WOS:000812938700002
Intraspecies plasmid and genomic variation of Mycobacterium kubicae revealed by the complete genome sequences of two clinical isolates	Hendrix, J; Epperson, LE; Durbin, D; Honda, JR; Strong, M	MICROBIAL GENOMICS	English	Article	hybrid genome assembly; MinION; whole-genome sequencing	NONTUBERCULOUS MYCOBACTERIA; ALGORITHM; ROLES	Mycobacterium kubicae is 1 of nearly 200 species of nontuberculous mycobacteria (NTM), environmental microorganisms that in some situations can infect humans and cause severe lung, skin and soft tissue infections. Although numerous studies have investigated the genetic variation among prevalent clinical NTM species, including Mycobacterium abscessus and Mycobacterium avium, many of the less commo…	University of Colorado System; University of Colorado Anschutz Medical Campus; National Jewish Health; National Jewish Health	37	MICROBIOLOGY SOC	LONDON	MICROB GENOMICS	2021	10	4	10.1099/mgen.0.000497	10	Genetics & Heredity; Microbiology	33355531	WOS:000617887500004
Rapid nanopore sequencing and predictive susceptibility testing of positive blood cultures from intensive care patients with sepsis	Harris, PNA; Bauer, MJ; Lueftinger, L; Beisken, S; Forde, BM; Balch, R; Cotta, M; Schlapbach, L; Raman, S; Shekar, K; Kruger, P; Lipman, J; Bialasiewicz, S; Coin, L; Roberts, JA; Paterson, DL; Irwin, AD	MICROBIOLOGY SPECTRUM	English	Article	long-read whole-genome sequencing; bloodstream infection; nanopore	TOOL	We aimed to evaluate the performance of Oxford Nanopore Technologies (ONT) sequencing from positive blood culture (BC) broths for bacterial identification and antimicrobial susceptibility prediction. Patients with suspected sepsis in four intensive care units were prospectively enrolled. Human-depleted DNA was extracted from positive BC broths and sequenced using ONT (MinION). Species abundance w…	University of Queensland; Royal Brisbane & Women's Hospital; Royal Brisbane & Women's Hospital; University Children's Hospital Zurich; University of Zurich; University of Queensland; Childrens Health Queensland Hospital & Health Service; Queensland Childrens Hospital; Prince Charles Hospital; University of Queensland; Princess Alexandra Hospital; University of Queensland; Royal Brisbane & Women's…	32	AMER SOC MICROBIOLOGY	WASHINGTON	MICROBIOL SPECTR	2024	10	3.7	10.1128/spectrum.03065-23	17	Microbiology	38193658	WOS:001138447200001
The COVID-19 Pandemic Sparked Off a Large-Scale Outbreak of Carbapenem-Resistant Acinetobacter baumannii from the Endemic Strains at an Italian Hospital	Petazzoni, G; Bellinzona, G; Merla, C; Corbella, M; Monzillo, V; Samuelsen, O; Corander, J; Sassera, D; Gaiarsa, S; Cambieri, P	MICROBIOLOGY SPECTRUM	English	Article	Acinetobacter baumannii; COVID-19; Illumina; Nanopore; outbreak; phylogeny; multidrug resistance; plasmids	BIOFILM FORMATION; ABIOTIC SURFACES; EVOLUTION; VIRULENCE; VERSION; GENE	Acinetobacter baumannii is a nosocomial pathogen that poses a serious threat due to the rise of incidence of multidrug-resistant (MDR) strains. During the COVID-19 pandemic, MDR A. baumannii clones have caused several outbreaks worldwide. Here, we describe a detailed investigation of an MDR A. baumannii outbreak that occurred at Policlinico San Matteo (Pavia, Italy). A total of 96 A. baumannii st…	IRCCS Fondazione San Matteo; University of Pavia; University of Pavia; UiT The Arctic University of Tromso; University Hospital of North Norway; UiT The Arctic University of Tromso; University of Oslo; University of Helsinki	43	AMER SOC MICROBIOLOGY	WASHINGTON	MICROBIOL SPECTR	2023	10	3.7	10.1128/spectrum.04505-22	9	Microbiology	36951563	WOS:000955278100001
Acute Vector-Borne Viral Infection:Zika and MinION Surveillance	De Jesus, JG; Giovanetti, M; Faria, NR; Alcantara, LC	MICROBIOLOGY SPECTRUM	English	Article	/	ZIKA VIRUS-INFECTIONS; YELLOW-FEVER; ARBOVIRUS INFECTIONS; NUCLEOTIDE-SEQUENCE; EPIDEMIC; OUTBREAK; TRANSMISSION; CHIKUNGUNYA; ANTIBODIES; MOSQUITOS	The MinION sequencer was launched by the Oxford Nanopore Technologies start-up as a disruptive technology for genome sequencing based on single-molecule synthesis. Its characteristics as a portable device, low cost, and simple library preparation have made it a good candidate for field researchers. MinION has been used to sequence a number of microorganisms, such as bacteria, viruses, and fungi. …	Fundacao Oswaldo Cruz; Fundacao Oswaldo Cruz; Universidade Federal de Minas Gerais; University of Oxford	80	AMER SOC MICROBIOLOGY	WASHINGTON	MICROBIOL SPECTR	2019	10	3.7	10.1128/microbiolspec.AME-0008-2019	11	Microbiology	31400093	WOS:000482711900003
Long-Read Sequencing and Hybrid Assembly for Genomic Analysis of Clinical Brucella melitensis Isolates	Craddock, HA; Motro, Y; Zilberman, B; Khalfin, B; Bardenstein, S; Moran-Gilad, J	MICROORGANISMS	English	Article	brucellosis; whole-genome sequencing; clinical genomics	TIME	Brucella melitensis is a key etiological agent of brucellosis and has been increasingly subject to characterization using sequencing methodologies. This study aimed to investigate and compare short-read, long-read, and hybrid assemblies of B. melitensis. Eighteen B. melitensis isolates from Southern Israel were sequenced using Illumina and the Oxford Nanopore (ONP) MinION, and hybrid assemblies w…	Ben-Gurion University of the Negev	62	MDPI	BASEL	MICROORGANISMS	2022	10	4.1	10.3390/microorganisms10030619	12	Microbiology	35336193	WOS:000778257600001
Phylodynamic Inference of Bacterial Outbreak Parameters Using Nanopore Sequencing	Steinig, E; Duchêne, S; Aglua, I; Greenhill, A; Ford, R; Yoannes, M; Jaworski, J; Drekore, J; Urakoko, B; Poka, H; Wurr, C; Ebos, E; Nangen, D; Manning, L; Laman, M; Firth, C; Smith, S; Pomat, W; Tong, SYC; Coin, L; McBryde, E; Horwood, P	MOLECULAR BIOLOGY AND EVOLUTION	English	Article	nanopore; phylodynamics; bacteria; outbreaks; reproduction number; BEAST	ZIKA VIRUS; REAL-TIME; ESTABLISHMENT; SURVEILLANCE	Nanopore sequencing and phylodynamic modeling have been used to reconstruct the transmission dynamics of viral epidemics, but their application to bacterial pathogens has remained challenging. Cost-effective bacterial genome sequencing and variant calling on nanopore platforms would greatly enhance surveillance and outbreak response in communities without access to sequencing infrastructure. Here…	University of Melbourne; Peter Doherty Institute; James Cook University; James Cook University; PNG Institute Of Medical Research; South Metropolitan Health Service; Fiona Stanley Fremantle Hospitals Group; Fiona Stanley Hospital; South Metropolitan Health Service; Fiona Stanley Fremantle Hospitals Group; Fiona Stanley Hospital; University of Western Australia; Harry Perkins Institute of Medical …	49	OXFORD UNIV PRESS	OXFORD	MOL BIOL EVOL	2022	10	11	10.1093/molbev/msac040	14	Biochemistry & Molecular Biology; Evolutionary Biology; Genetics & Heredity	35171290	WOS:000774213300001
Using Nanopore Sequencing to Obtain Complete Bacterial Genomes from Saliva Samples	Baker, JL	MSYSTEMS	English	Article	oral microbiome; genomics; metagenomics; pangenomics	MICROBIOTA; ALGORITHM; REVEAL; CARIES	Obtaining complete, high-quality reference genomes is essential to the study of any organism. Recent advances in nanopore sequencing, as well as genome assembly and analysis methods, have made it possible to obtain complete bacterial genomes from metagenomic (i.e., multispecies) samples, including those from the human microbiome. In this study, methods are presented to obtain complete bacterial g…	J. Craig Venter Institute; University of California System; University of California San Diego	61	AMER SOC MICROBIOLOGY	WASHINGTON	MSYSTEMS	2022	10	5	10.1128/msystems.00491-22	20	Microbiology	35993719	WOS:000843288600001
The dynamics of circulating SARS-CoV-2 lineages in Bogor and surrounding areas reflect variant shifting during the first and second waves of COVID-19 in Indonesia	Prasetyoputri, A; Dharmayanthi, AB; Iryanto, SB; Andriani, A; Nuryana, I; Wardiana, A; Ridwanuloh, AM; Swasthikawati, S; Hariyatun, H; Nugroho, HA; Idris, I; Indriawati, I; Noviana, Z; Oktavia, L; Yuliawati, Y; Masrukhin, M; Hasrianda, EF; Sukmarini, L; Fahrurrozi, F; Yanthi, ND; Fathurahman, AT; Wulandari, AS; Setiawan, R; Rizal, S; Fathoni, A; Kusharyoto, W; Lisdiyanti, P; Ningrum, RA; Saputra,…	PEERJ	English	Article	SARS-CoV-2; COVID-19; Indonesian lineages; Bogor; Variant shifting; Nanopore; Genomic surveillance; Delta variants	/	Background. Indonesia is one of the Southeast Asian countries with high case numbers of COVID-19 with up to 4.2 million confirmed cases by 29 October 2021. Understanding the genome of SARS-CoV-2 is crucial for delivering public health intervention as certain variants may have different attributes that can potentially affect their transmissibility, as well as the performance of diagnostics, vaccin…	National Research & Innovation Agency of Indonesia (BRIN); National Research & Innovation Agency of Indonesia (BRIN); National Research & Innovation Agency of Indonesia (BRIN); National Research & Innovation Agency of Indonesia (BRIN)	51	PEERJ INC	LONDON	PEERJ	2022	10	2.3	10.7717/peerj.13132	20	Science & Technology - Other Topics	35341058	WOS:000782657100001
Plasmid analysis of NDM metallo-β-lactamase-producing Enterobacterales isolated in Vietnam	Hirabayashi, A; Yahara, K; Mitsuhashi, S; Nakagawa, S; Imanishi, T; Ha, VTT; Nguyen, AV; Nguyen, ST; Shibayama, K; Suzuki, M	PLOS ONE	English	Article	/	COMPLETE NUCLEOTIDE-SEQUENCE; KLEBSIELLA-PNEUMONIAE; CARBAPENEM RESISTANCE; ESCHERICHIA-COLI; GENES; ACQUISITION; ENVIRONMENT	Carbapenem-resistant Enterobacterales (CRE) represent a serious threat to public health due to the lack of treatment and high mortality. The rate of antimicrobial resistance of Enterobacterales isolates to major antimicrobials, including carbapenems, is much higher in Vietnam than in Western countries, but the reasons remain unknown due to the lack of genomic epidemiology research. A previous stu…	Japan Institute for Health Security (JIHS); National Institute of Infectious Diseases (NIID); Tokai University; Japan Institute for Health Security (JIHS); National Institute of Infectious Diseases (NIID)	38	PUBLIC LIBRARY SCIENCE	SAN FRANCISCO	PLOS ONE	2021	10	2.9	10.1371/journal.pone.0231119	16	Science & Technology - Other Topics	34319973	WOS:000685247800048
Whole genome sequencing and phylogenetic classification of Tunisian SARS-CoV-2 strains from patients of the Military Hospital in Tunis	Handrick, S; Bestehorn-Willmann, M; Eckstein, S; Walter, MC; Antwerpen, MH; Naija, H; Stoecker, K; Wölfel, R; Ben Moussa, M	VIRUS GENES	English	Article	SARS-CoV-2; COVID-19; RT-qPCR; Sequencing; Tunisia; Morocco	/	In the present work, two complete genome sequences of SARS-CoV-2 were obtained from nasal swab samples of Tunisian SARS-CoV-2 PCR-positive patients using nanopore sequencing. The virus genomes of two of the patients examined, a Tunisian soldier returning from a mission in Morocco and a member of another Tunisian family, showed significant differences in analyses of the total genome and single nuc…	Bundeswehr Institute of Microbiology (IMB)	11	SPRINGER	DORDRECHT	VIRUS GENES	2020	10	1.9	10.1007/s11262-020-01795-9	5	Genetics & Heredity; Virology	33034798	WOS:000578404700001
Genomic Epidemiology of SARS-CoV-2 in Tocantins State and the Diffusion of P.1.7 and AY.99.2 Lineages in Brazil	de Souza, UJB; dos Santos, RN; de Melo, FL; Belmok, A; Galvao, JD; de Rezende, TCV; Cardoso, FDP; Carvalho, RF; Oliveira, MD; Ribeiro, JC Jr; Gabev, EE; Sabino, EC; Arns, CW; Ribeiro, BM; Spilki, FR; Campos, FS	VIRUSES-BASEL	English	Article	SARS-CoV-2; variants of concern; genome analysis; viral evolution; viral trajectory	VISUALIZATION; PERFORMANCE; COVID-19; MODEL	Tocantins is a state in the cross-section between the Central-West, North and Northeast regions of Brazilian territory; it is a gathering point for travelers and transportation from the whole country. In this study, 9493 genome sequences, including 241 local SARS-CoV-2 samples (collected from 21 December 2020, to 16 December 2021, and sequenced in the MinION platform) were analyzed with the follo…	Universidade Federal do Tocantins (UFT); Universidade de Brasilia; Universidade Federal de Goias; Medical University Sofia; Universidade de Sao Paulo; Universidade Estadual de Campinas; Universidade Feevale	53	MDPI	BASEL	VIRUSES-BASEL	2022	10	3.8	10.3390/v14040659	16	Virology	35458389	WOS:000785108500001
Determining the Suitability of MinION's Direct RNA and DNA Amplicon Sequencing for Viral Subtype Identification	Leigh, DM; Schefer, C; Cornejo, C	VIRUSES-BASEL	English	Article	MinION; RNA; cDNA; DNA amplicon; diagnostics; mycovirus	CHESTNUT BLIGHT; BIOLOGICAL-CONTROL; CRYPHONECTRIA-PARASITICA; SELECTION; EVOLUTION; PATTERN	The MinION sequencer is increasingly being used for the detection and outbreak surveillance of pathogens due to its rapid throughput. For RNA viruses, MinION's new direct RNA sequencing is the next significant development. Direct RNA sequencing studies are currently limited and comparisons of its diagnostic performance relative to different DNA sequencing approaches are lacking as a result. We so…	Swiss Federal Institutes of Technology Domain; Swiss Federal Institute for Forest, Snow & Landscape Research	39	MDPI	BASEL	VIRUSES-BASEL	2020	10	3.8	10.3390/v12080801	11	Virology	32722480	WOS:000578904200001
Characterization of Altered Oropharyngeal Microbiota in Hospitalized Patients With Mild SARS-CoV-2 Infection	Shi, YL; He, MZ; Han, MZ; Gui, HY; Wang, P; Yu, JL; Ge, YL; Sun, Y; Huang, SH	FRONTIERS IN CELLULAR AND INFECTION MICROBIOLOGY	English	Article	oral swab specimens; nanopore sequencing; full-length 16S rRNA; microbial analysis; SARS-CoV-2 patients; oral microbiota	/	Coronavirus disease 2019 (COVID-19) remains a serious emerging global health problem, and little is known about the role of oropharynx commensal microbes in infection susceptibility and severity. Here, we present the oropharyngeal microbiota characteristics identified by full-length 16S rRNA gene sequencing through the NANOPORE platform of oropharynx swab specimens from 10 mild COVID-19 patients …	Anhui Medical University; Anhui Medical University	35	FRONTIERS MEDIA SA	LAUSANNE	FRONT CELL INFECT MI	2022	9	4.6	10.3389/fcimb.2022.824578	9	Immunology; Microbiology	35372134	WOS:000778669600001
Comparative analysis of full-length 16s ribosomal RNA genome sequencing in human fecal samples using primer sets with different degrees of degeneracy	Waechter, C; Fehse, L; Welzel, M; Heider, D; Babalija, L; Cheko, J; Mueller, J; Pöling, J; Braun, T; Pankuweit, S; Weihe, E; Kinscherf, R; Schieffer, B; Luesebrink, U; Soufi, M; Ruppert, V	FRONTIERS IN GENETICS	English	Article	16S rRNA; gut microbiome; human fecal microbiome; next-generation sequencing (NGS); nanopore sequencing; oxford nanopore technologies (ONT); MinION Mk1C; primer degeneracy	MICROBIOME; DESIGN; GENES; MISEQ	Next-generation sequencing has revolutionized the field of microbiology research and greatly expanded our knowledge of complex bacterial communities. Nanopore sequencing provides distinct advantages, combining cost-effectiveness, ease of use, high throughput, and high taxonomic resolution through its ability to process long amplicons, such as the entire 16s rRNA genome. We examine the performance…	Philipps University Marburg; University Hospital of Giessen & Marburg; Max Planck Society; Philipps University Marburg; Philipps University Marburg; University Hospital of Giessen & Marburg; Philipps University Marburg	40	FRONTIERS MEDIA SA	LAUSANNE	FRONT GENET	2023	9	2.8	10.3389/fgene.2023.1213829	9	Genetics & Heredity	37564874	WOS:001044730000001
Evaluation of multiplex nanopore sequencing for Salmonella serotype prediction and antimicrobial resistance gene and virulence gene detection	Wu, XW; Luo, H; Ge, CT; Xu, F; Deng, XY; Wiedmann, M; Baker, RC; Stevenson, AE; Zhang, GT; Tang, SL	FRONTIERS IN MICROBIOLOGY	English	Article	whole genome sequencing; Oxford Nanopore Technologies; Salmonella; serotype prediction; foodborne pathogens; food safety; antimicrobial resistance genes; virulence genes	ENTERICA; SURVEILLANCE; NETWORK	In a previous study, Multiplex-nanopore-sequencing based whole genome sequencing (WGS) allowed for accurate in silico serotype prediction of Salmonella within one day for five multiplexed isolates, using both SISTR and SeqSero2. Since only ten serotypes were tested in our previous study, the conclusions above were yet to be evaluated in a larger scale test. In the current study we evaluated this …	Mars; University System of Georgia; University of Georgia; Cornell University	53	FRONTIERS MEDIA SA	LAUSANNE	FRONT MICROBIOL	2023	9	4	10.3389/fmicb.2022.1073057	14	Microbiology	36817104	WOS:000933270500001
Automated antimicrobial susceptibility testing and antimicrobial resistance genotyping using Illumina and Oxford Nanopore Technologies sequencing data among Enterobacteriaceae	Conzemius, R; Bergman, Y; Majek, P; Beisken, S; Lewis, S; Jacobs, EBB; Tamma, PDD; Simner, PJJ	FRONTIERS IN MICROBIOLOGY	English	Article	antimicrobial susceptibility testing; molecular diagnostics; carbapenem-resistant Enterobacteriaceae; whole-genome sequencing; nanopore sequencing; point-of-care testing; WGS-AST	KLEBSIELLA; OMPK35	Whole-genome sequencing (WGS) enables the molecular characterization of bacterial pathogens. We compared the accuracy of the Illumina and Oxford Nanopore Technologies (ONT) sequencing platforms for the determination of AMR classes and antimicrobial susceptibility testing (AST) among 181 clinical Enterobacteriaceae isolates. Sequencing reads for each isolate were uploaded to AREScloud (Ares Geneti…	Johns Hopkins University; Johns Hopkins University	48	FRONTIERS MEDIA SA	LAUSANNE	FRONT MICROBIOL	2022	9	4	10.3389/fmicb.2022.973605	10	Microbiology	36003946	WOS:000843323300001
Discovery of a Novel Hypervirulent Acinetobacter baumannii Strain in a Case of Community-Acquired Pneumonia	Zhou, H; Larkin, PMK; Huang, JW; Yao, YK; Zhu, BQ; Yang, Q; Hua, XT; Zhou, JY; Yang, SX; Yu, YS	INFECTION AND DRUG RESISTANCE	English	Article	Acinetobacter baumannii; hypervirulent; community-acquired pneumonia; novel strain; emerging pathogen	IDENTIFICATION; RESISTANCE	Purpose: Acinetobacter baumannii is associated with both hospital-acquired infections and community-acquired pneumonia (CAP). Here, we describe a novel strain of A. baumannii in a case of CAP in a previously healthy rural villager from Central Eastern China. Materials and Methods: A. baumannii isolated from the patient (LS01) was compared to well-characterized pathogenic strain (AB5075), nosocomi…	Zhejiang University; University of California System; University of California Los Angeles; Wenzhou Medical University; Zhejiang University; Zhejiang University; Zhejiang University; Zhejiang University	23	DOVE MEDICAL PRESS LTD	ALBANY	INFECT DRUG RESIST	2020	9	2.9	10.2147/IDR.S244044	7	Infectious Diseases; Pharmacology & Pharmacy	32368105	WOS:000527940400001
Rapid identification and metagenomics analysis of the adenovirus type 55 outbreak in Hubei using real-time and high-throughput sequencing platforms	Li, PH; Wang, KY; Qiu, SF; Lin, YF; Xie, J; Li, JH; Li, LZ; Jia, LL; Jiang, YQ; Li, P; Song, HB	INFECTION GENETICS AND EVOLUTION	English	Article	Human adenovirus type 55; Nanopore sequencing; BGI sequencing	ALIGNMENT	The rise in human adenovirus (HAdV) infections poses a serious challenge to public health in China. Real-time (RT) sequencing provides solutions for achieving rapid pathogen identification during outbreaks, whereas highthroughput sequencing yields higher sequence accuracy. In the present study, we report the outcomes of applying nanopore and BGI platforms in the identification and genomic analysi…	Academy of Military Medical Sciences - China	24	ELSEVIER	AMSTERDAM	INFECT GENET EVOL	2021	9	2.6	10.1016/j.meegid.2021.104939	7	Infectious Diseases	34029726	WOS:000688328300002
Genomic characterization of mumps viruses from a large-scale mumps outbreak in Arkansas, 2016	Alkam, D; Jenjaroenpun, P; Wongsurawat, T; Udaondo, Z; Patumcharoenpol, P; Robeson, M; Haselow, D; Mason, W; Nookaew, I; Ussery, D; Jun, SR	INFECTION GENETICS AND EVOLUTION	English	Article	Mumps outbreak; Vaccination; Virus resurgence; Epitope prediction	SEQUENCE ALIGNMENT; VACCINE; DIVERSITY; STRAIN; AMPLIFICATION; PREDICTIONS; STUDENTS; PROTEIN; FUSION	In 2016, a year-long large-scale mumps outbreak occurred in Arkansas among a highly-vaccinated population. A total of 2954 mumps cases were identified during this outbreak. The majority of cases (1676 (57%)) were schoolaged children (5-17 years), 1536 (92%) of these children had completed the mumps vaccination schedule. To weigh the possibility that the mumps virus evaded vaccine-induced immunity…	University of Arkansas System; University of Arkansas Medical Sciences; University of Arkansas System; University of Arkansas Medical Sciences	58	ELSEVIER	AMSTERDAM	INFECT GENET EVOL	2019	9	2.6	10.1016/j.meegid.2019.103965	11	Infectious Diseases	31319177	WOS:000495408600030
Nanopore 16S amplicon sequencing enables rapid detection of pathogen in knee periprosthetic joint infection	Han, HS; Ro, D; Chung, JHY; Kim, N; Moon, J	INTERNATIONAL JOURNAL OF MEDICAL MICROBIOLOGY	English	Article	Prosthetic joint infection; 16S rDNA PCR; 16S rDNA sequencing; Nanopore sequencing; Pathogen identification	RNA GENE PCR; UNITED-STATES; DIAGNOSIS; ARTHROPLASTY; MANAGEMENT; HIP; SENSITIVITY; RISK	Objectives: We investigated whether nanopore 16S amplicon sequencing is capable of bacterial identification in patients with knee prosthetic joint infection (PJI), and we compared its efficacy with conventional culture studies.Methods: In total, 36 patients who had clinical manifestation suspected of PJI were enrolled in this study. To begin, synovial fluids were aspirated from the affected knee …	Seoul National University (SNU); Seoul National University (SNU); Seoul National University Hospital; Seoul National University (SNU); Seoul National University Hospital; Seoul National University (SNU); Seoul National University Hospital	39	ELSEVIER GMBH	MUNICH	INT J MED MICROBIOL	2022	9	4.5	10.1016/j.ijmm.2022.151570	8	Microbiology; Virology	36288682	WOS:000880362900001
A simplified, amplicon-based method for whole genome sequencing of human respiratory syncytial viruses	Dong, XM; Deng, YM; Aziz, A; Whitney, P; Clark, J; Harris, P; Bautista, C; Costa, AM; Waller, G; Daley, AJ; Wieringa, M; Korman, T; Barr, IG	JOURNAL OF CLINICAL VIROLOGY	English	Article	Respiratory syncytial virus; Whole genome sequencing; One-step multiplex RT-PCR	MULTIPLEX PCR; PREVENTION	Background: Human Respiratory Syncytial Virus (RSV) infections pose a significant risk to human health worldwide, especially for young children. Whole genome sequencing (WGS) provides a useful tool for global surveillance to better understand the evolution and epidemiology of RSV and provide essential information that may impact on antibody treatments, antiviral drug sensitivity and vaccine effec…	University of Melbourne; Peter Doherty Institute; Melbourne Health; Royal Melbourne Hospital; World Health Organization; University of Melbourne; Peter Doherty Institute; Childrens Health Queensland Hospital & Health Service; Queensland Childrens Hospital; Childrens Health Queensland Hospital & Health Service; University of Queensland; Royal Brisbane & Women's Hospital; Royal Children's Hospital …	28	ELSEVIER	AMSTERDAM	J CLIN VIROL	2023	9	4	10.1016/j.jcv.2023.105423	6	Virology	36934591	WOS:000957295400001
Molecular rapid diagnostic testing for bloodstream infections: Nanopore targeted sequencing with pathogen-specific primers	Han, DS; Yu, F; Zhang, D; Hu, J; Zhang, X; Xiang, DR; Lou, B; Chen, Y; Zheng, SF	JOURNAL OF INFECTION	English	Article	Bloodstream infections; Targeted nanopore sequencing; Metagenomic next -generation sequencing; Blood culture; Antibiotic susceptibility testing	SEPSIS	Background: Nanopore sequencing, known for real-time analysis, shows promise for rapid clinical infection diagnosis but lacks effective assays for bloodstream infections (BSIs). Methods: We prospectively assessed the performance of a novel nanopore targeted sequencing (NTS) assay in identifying pathogens and predicting antibiotic resistance in BSIs, analyzing 387 blood samples from December 2021 …	Zhejiang University; Zhejiang University; Zhejiang University; Collaborative Innovation Center for Diagnosis & Treatment of Infectious Diseases; Zhejiang University; Zhejiang University	38	W B SAUNDERS CO LTD	LONDON	J INFECTION	2024	9	14.3	10.1016/j.jinf.2024.106166	9	Infectious Diseases	38670268	WOS:001237209900001
Improved hepatitis delta virus genome characterization by single molecule full-length genome sequencing combined with VIRiONT pipeline	Charre, C; Regue, H; Dény, P; Josset, L; Chemin, I; Zoulim, F; Scholtes, C	JOURNAL OF MEDICAL VIROLOGY	English	Article	genotyping; HDV editing; hepatitis delta virus (HDV); local pipeline; long-read sequencing; whole-genome sequencing	REPLICATION; COINFECTION; PHYLOGENIES; GENUS	Hepatitis B virus (HBV) and hepatitis D virus (HDV) coinfection confers a greater risk for accelerated liver disease progression. Full-length characterization of HDV genome is necessary to understand pathogenesis and treatment response. However, owing to its high variability and tight structure, sequencing approaches remain challenging. Herein, we present a workflow to amplify, sequence, and anal…	Assistance Publique Hopitaux Paris (APHP); Universite Paris Cite; Hopital Universitaire Cochin - APHP; Centre National de la Recherche Scientifique (CNRS); CNRS - National Institute for Biology (INSB); Institut National de la Sante et de la Recherche Medicale (Inserm); Universite Paris Cite; CHU Lyon; Universite Claude Bernard Lyon 1; Institut National de la Sante et de la Recherche Medicale (Ins…	52	WILEY	HOBOKEN	J MED VIROL	2023	9	6.8	10.1002/jmv.28634	14	Virology	36879535	WOS:000960340500041
Clinical evaluation of metagenomic next-generation sequencing in unbiased pathogen diagnosis of urinary tract infection	Wang, Y; Chen, T; Zhang, SW; Zhang, L; Li, Q; Lv, QY; Kong, DC; Jiang, H; Ren, YH; Jiang, YQ; Li, Y; Huang, WH; Liu, P	JOURNAL OF TRANSLATIONAL MEDICINE	English	Article	Metagenomic next-generation sequencing (mNGS); Pathogen diagnosis; Urinary tract infections (UTIs); MinION; Automatic bioinformatics	LACTOBACILLUS-CRISPATUS; CULTURE	BackgroundEarly availability of pathogen identification in urinary tract infections (UTIs) has critical importance in disease management. Metagenomic next-generation sequencing (mNGS) has the potential to transform how acute and serious infections are diagnosed by offering unbiased and culture-free pathogen detection. However, clinical experience with application of the mNGS test is relatively li…	Beijing Institute of Microbiology & Epidemiology; Academy of Military Medical Sciences - China	30	BMC	LONDON	J TRANSL MED	2023	9	6.1	10.1186/s12967-023-04562-0	13	Research & Experimental Medicine	37891586	WOS:001088321800003
Culture-Independent Workflow for Nanopore MinION-Based Sequencing of Influenza A Virus	Miah, M; Hossain, ME; Hasan, R; Alam, MS; Puspo, JA; Hasan, MM; Chowdhury, S; Rahman, MZ	MICROBIOLOGY SPECTRUM	English	Article	influenza; clinical specimen; whole genome; MinION; high throughput	GENOME; AMPLIFICATION; SWINE; SUBTYPES; H1N1	Whole-genome sequencing (WGS) of influenza A virus (IAV) is crucial for identifying diverse subtypes and newly evolved variants and for selecting vaccine strains. In developing countries, where facilities are often inadequate, WGS is challenging to perform using conventional next-generation sequencers. In this study, we established a culture-independent, high-throughput native barcode amplicon se…	International Centre for Diarrhoeal Disease Research (ICDDR)	43	AMER SOC MICROBIOLOGY	WASHINGTON	MICROBIOL SPECTR	2023	9	3.7	10.1128/spectrum.04946-22	9	Microbiology	37212605	WOS:000992137200001
Retrospective Genomic Surveillance of Chikungunya Transmission in Minas Gerais State, Southeast Brazil	Fritsch, H; Giovanetti, M; Xavier, J; Adelino, TER; Fonseca, V; de Jesus, JG; de Jesus, R; Freitas, C; Peterka, CRL; de Albuquerque, CFC; de Filippis, AMB; da Cunha, RV; Silva, EC; Alcantara, LC Jr; Iani, FCD	MICROBIOLOGY SPECTRUM	English	Article	CHIKV; genomic monitoring; southeast Brazil; Nanopore sequencing	VIRUS; ALIGNMENT; ZIKA	Arbovirus infections in Brazil, including chikungunya, dengue, yellow fever, and Zika, result in considerable morbidity and mortality and are pressing public health concerns. However, our understanding of these outbreaks is hampered by the limited availability of genomic data. Brazil accounted for a total number of 1,276,194 reported cases of chikungunya fever between 2014 and 2022. Additionally,…	Fundacao Oswaldo Cruz; University Campus Bio-Medico - Rome Italy; Pan American Health Organization; Fundacao Oswaldo Cruz; Fundacao Oswaldo Cruz	38	AMER SOC MICROBIOLOGY	WASHINGTON	MICROBIOL SPECTR	2022	9	3.7	10.1128/spectrum.01285-22	8	Microbiology	36005767	WOS:000846763200001
An Evaluation of Avian Influenza Virus Whole-Genome Sequencing Approaches Using Nanopore Technology	Ip, HS; Uhm, S; Killian, ML; Torchetti, MK	MICROORGANISMS	English	Article	avian influenza; whole-genome sequencing; next-generation sequencing; nanopore sequencing		As exemplified by the global response to the SARS-CoV-2 pandemic, whole-genome sequencing played an important role in monitoring the evolution of novel viral variants and provided guidance on potential antiviral treatments. The recent rapid and extensive introduction and spread of highly pathogenic avian influenza virus in Europe, North America, and elsewhere raises the need for similarly rapid s…	United States Department of the Interior; United States Geological Survey; University of Wisconsin System; University of Wisconsin Madison; United States Department of Agriculture (USDA); USDA Agricultural Research Service	32	MDPI	BASEL	MICROORGANISMS	2023	9	4.1	10.3390/microorganisms11020529	10	Microbiology	36838494	WOS:000940072400001
Rapid identification of pathogens associated with ventilator-associated pneumonia by Nanopore sequencing	Wu, N; Ranjan, P; Tao, CY; Liu, C; Yang, EC; He, B; Erb-Downward, JR; Bo, SN; Zheng, JJ; Guo, CX; Liu, BB; Sun, LN; Yan, W; Wang, M; Wang, WT; Wen, JN; Yang, P; Yang, L; Tian, QS; Dickson, RP; Shen, N	RESPIRATORY RESEARCH	English	Article	Ventilator-associated pneumonia; Endotracheal aspirate; Pathogen identification; Nanopore sequencing; Clinical identification method	ACQUIRED PNEUMONIA; REAL-TIME; GUIDELINES; CHINA	Background Aetiology detection is crucial in the diagnosis and treatment of ventilator-associated pneumonia (VAP). However, the detection method needs improvement. In this study, we used Nanopore sequencing to build a quick detection protocol and compared the efficiency of different methods for detecting 7 VAP pathogens. Methods The endotracheal aspirate (ETA) of 83 patients with suspected VAP fr…	University of Michigan System; University of Michigan; Peking University; Peking University	28	BMC	LONDON	RESP RES	2021	9	/	10.1186/s12931-021-01909-3	14	Respiratory System	34893078	WOS:000729077800001
Phylogenomics reveals viral sources, transmission, and potential superinfection in early-stage COVID-19 patients in Ontario, Canada	Sjaarda, CP; Rustom, N; Evans, GA; Huang, D; Perez-Patrigeon, S; Hudson, ML; Wong, H; Sun, ZX; Guan, TH; Ayub, M; Soares, CN; Colautti, RI; Sheth, PM	SCIENTIFIC REPORTS	English	Article	/	CORONAVIRUS	The emergence and rapid global spread of SARS-CoV-2 demonstrates the importance of infectious disease surveillance, particularly during the early stages. Viral genomes can provide key insights into transmission chains and pathogenicity. Nasopharyngeal swabs were obtained from thirty-two of the first SARS-CoV-2 positive cases (March 18-30) in Kingston Ontario, Canada. Viral genomes were sequenced …	Queens University - Canada; Queens University - Canada; Queens University - Canada; McMaster University; Queens University - Canada; Queens University - Canada; Queens University - Canada; Queens University - Canada	38	NATURE PORTFOLIO	BERLIN	SCI REP-UK	2021	9	3.8	10.1038/s41598-021-83355-1	9	Science & Technology - Other Topics	33580132	WOS:000620249300006
Genomic analysis of human noroviruses using combined Illumina-Nanopore data	Flint, A; Reaume, S; Harlow, J; Hoover, E; Weedmark, K; Nasheri, N	VIRUS EVOLUTION	English	Article	norovirus; full-length amplicons; Illumina MiSeq; Oxford Nanopore; single-nucleotide variation; recombination	DEPENDENT RNA-POLYMERASE; UNITED-STATES; EMERGENCE	Whole-genome sequence analysis of noroviruses is routinely performed by employing a metagenomic approach. While this methodology has several advantages, such as allowing for the examination of co-infection, it has some limitations, such as the requirement of high viral load to achieve full-length or near full-length genomic sequences. In this study, we used a pre-amplification step to obtain full…	Health Canada; Health Canada; University of Ottawa	48	OXFORD UNIV PRESS	OXFORD	VIRUS EVOL	2021	9	5.5	10.1093/ve/veab079	11	Virology	35186325	WOS:000757131800028
Multiple Occurrences of a 168-Nucleotide Deletion in SARS-CoV-2 ORF8, Unnoticed by Standard Amplicon Sequencing and Variant Calling Pipelines	Brandt, D; Simunovic, M; Busche, T; Haak, M; Belmann, P; Jünemann, S; Schulz, T; Klages, LJ; Vinke, S; Beckstette, M; Pohl, E; Scherer, C; Sczyrba, A; Kalinowski, J	VIRUSES-BASEL	English	Article	genomic surveillance; SARS-CoV-2; nanopore sequencing; ORF8 deletion; viral genomics	LIBRARY; GENOME	Genomic surveillance of the SARS-CoV-2 pandemic is crucial and mainly achieved by amplicon sequencing protocols. Overlapping tiled-amplicons are generated to establish contiguous SARS-CoV-2 genome sequences, which enable the precise resolution of infection chains and outbreaks. We investigated a SARS-CoV-2 outbreak in a local hospital and used nanopore sequencing with a modified ARTIC protocol em…	University of Bielefeld; University of Bielefeld; Durham University; Evangelical Hospital Bethel (EvKB) - House Gilead I; University of Bielefeld	32	MDPI	BASEL	VIRUSES-BASEL	2021	9	3.8	10.3390/v13091870	12	Virology	34578452	WOS:000702146200001
Feasibility of MinION Nanopore Rapid Sequencing in the Detection of Common Diarrhea Pathogens in Fecal Specimen	Khan, MAA; Ghosh, P; Chowdhury, R; Hossain, F; Mahmud, A; Faruque, AG; Ahmed, T; Abd El Wahed, A; Mondal, D	ANALYTICAL CHEMISTRY	English	Article	/	/	The need for fast detection of etiological agents outside the narrow target range of pathogens that may cause an event of an infectious disease epidemic necessitates rapid sequencing technologies to be implemented in routine diagnostic procedures. We tested the performance of a PCR-free rapid nanopore barcoding assay to detect microbial species by analyzing genomic contents extracted from acute d…	International Centre for Diarrhoeal Disease Research (ICDDR); Leipzig University; International Centre for Diarrhoeal Disease Research (ICDDR)	27	AMER CHEMICAL SOC	WASHINGTON	ANAL CHEM	2022	8	/	10.1021/acs.analchem.2c02771	9	Chemistry	36413486	WOS:000890502200001
Phylogenetic pattern of SARS-CoV-2 from COVID-19 patients from Bosnia and Herzegovina: Lessons learned to optimize future molecular and epidemiological approaches	Goletic, T; Konjhodzic, R; Fejzic, N; Goletic, S; Eterovic, T; Softic, A; Kustura, A; Salihefendic, L; Ostojic, M; Travar, M; Mrdjen, V; Tihic, N; Jazic, S; Musa, S; Marjanovic, D; Hukic, M	BOSNIAN JOURNAL OF BASIC MEDICAL SCIENCES	English	Article	Viral infections; COVID-19; SARS-CoV-2; whole genome sequencing; nanopore sequencing; phylogeny; Bosnia and Herzegovina	/	This is the first report of molecular and epidemiology findings from Bosnia and Herzegovina related to ongoing severe acute respiratory syndrome coronavirus 2 epidemic. Whole genome sequence of four samples from coronavirus disease 2019 (COVID-19) outbreaks was done in two laboratories in Bosnia and Herzegovina (Veterinary Faculty Sarajevo and Alea Genetic Center). All four BiH sequences cluster …	University of Sarajevo; University of Mostar; University of Banja Luka (UNIBL); University of Tuzla; Institute for Anthropological Research Zagreb	14	ASSOC BASIC MEDICAL SCI FEDERATION BOSNIA & HERZEGOVINA SARAJEVO	CEKALUSA	BOSNIAN J BASIC MED	2021	8	3.1	10.17305/bjbms.2020.5381	4	Research & Experimental Medicine	33577445	WOS:000674672700012
Nanopore Electrochemistry for Pathogen Detection	Ju, Y; Pu, MJ; Sun, K; Song, GQ; Geng, J	CHEMISTRY-AN ASIAN JOURNAL	English	Review	nanopore sensing; bacteria; virus; nanopore sequencing	MICROBIAL GENOMES; RESISTANCE; BACTERIAL; IDENTIFICATION; DIAGNOSIS; DNA; MINION; INFECTIONS; SEQUENCE; TIME	Pathogen infections seriously threaten human health, and there is an urgent demand for rapid and efficient pathogen identification to provide instructions in clinical diagnosis and therapeutic intervention. Recently, nanopore technology, a rapidly maturing technology which delivers ultrasensitive sensing and high throughput in real-time and at low cost, has achieved success in pathogen detection.…	Sichuan University; Sichuan University; Sichuan University; North Sichuan Medical University	151	WILEY-V C H VERLAG GMBH	WEINHEIM	CHEM-ASIAN J	2022	8	3.5	10.1002/asia.202200774	14	Chemistry	36069587	WOS:000859252100001
A Confirmed Case of SARS-CoV-2 Pneumonia With Negative Routine Reverse Transcriptase-Polymerase Chain Reaction and Virus Variation in Guangzhou, China	Li, ZT; Li, YH; Chen, LD; Li, SQ; Yu, L; Zhu, AR; Yang, F; Jiang, Q; Chen, LY; Zhao, JC; Lu, WJ; Zhong, NS; Ye, F	CLINICAL INFECTIOUS DISEASES	English	Article	SARS-CoV-2; pneumonia; routine RT-PCR; virus variation; nanopore sequencing	ADULTS; H1N1	Background. Severe acute respiratory syndrome coronavirus 2 (SARS-CoV-2) pneumonia is a newly recognized disease, and its diagnosis is primarily confirmed by routine reverse transcriptase -polymerase chain reaction (RT-PCR) detection of SARS-CoV-2. Methods. However, we report a confirmed case of SARS-CoV-2 pneumonia with a negative routine RT-PCR. Results. This case was finally diagnosed by nanop…	State Key Laboratory of Respiratory Disease; Guangzhou Medical University	23	OXFORD UNIV PRESS INC	CARY	CLIN INFECT DIS	2021	8	8.2	10.1093/cid/ciaa941	8	Immunology; Infectious Diseases; Microbiology	32642757	WOS:000697378800025
Evidence of structural rearrangements in ESBL-positive pESI(like) megaplasmids of S.Infantis	Alba, P; Carfora, V; Feltrin, F; Diaconu, EL; Sorbara, L; Dell'Aira, E; Cerci, T; Ianzano, A; Donati, V; Franco, A; Battisti, A	FEMS MICROBIOLOGY LETTERS	English	Article	Salmonella Infantis; megaplasmid; long read sequencing; rearrangements; antibiotic resistance; ESBL-producing Salmonella	INFANTIS; BROILER	The increasing prevalence of pESI(like)-positive, multidrug-resistant (MDR) S. Infantis in Europe is a cause of major concern. As previously demonstrated, the pESI(like) megaplasmid is not only a carrier of antimicrobial resistant (AMR) genes (at least tet, dfr, and sul genes), but also harbours several virulence and fitness genes, and toxin/antitoxin systems that enhance its persistence in the S…	/	35	OXFORD UNIV PRESS	OXFORD	FEMS MICROBIOL LETT	2023	8	2.2	10.1093/femsle/fnad014	8	Microbiology	36806934	WOS:000945682700003
Outbreak of carbapenem-resistant enterobacteria in a thoracic-oncology unit through clonal and plasmid-mediated transmission of the blaOXA-48 gene in Southern France	Hadjadj, L; Cassir, N; Saïdani, N; Hoffman, C; Brouqui, P; Astoul, P; Rolain, JM; Baron, SA	FRONTIERS IN CELLULAR AND INFECTION MICROBIOLOGY	English	Article	whole genome sequencing; carbapenemase; bla(OXA-48) gene; IncL; M plasmid; fecal microbiota transplantation	KLEBSIELLA-PNEUMONIAE; EPIDEMIOLOGY; CARRIAGE; BACTERIA	BackgroundCarbapenemase-producing Enterobacteriaceae (CPE) represent an increasing threat to public health, especially in hospitals. ObjectivesTo investigate an outbreak of CPE in a thoracic-oncology unit by using whole genome sequencing (WGS) and to describe the control measures taken to limit the epidemic, including fecal microbiota transplantation (FMT). MethodsA retrospective study between De…	Aix-Marseille Universite; Assistance Publique-Hopitaux de Marseille; Institut de Recherche pour le Developpement (IRD); Aix-Marseille Universite; Aix-Marseille Universite	35	FRONTIERS MEDIA SA	LAUSANNE	FRONT CELL INFECT MI	2022	8	4.6	10.3389/fcimb.2022.1048516	11	Immunology; Microbiology	36569199	WOS:000899294300001
A framework for real-time monitoring, analysis and adaptive sampling of viral amplicon nanopore sequencing	Munro, R; Holmes, N; Moore, C; Carlile, M; Payne, A; Tyson, JR; Williams, T; Alder, C; Snell, LB; Nebbia, G; Santos, R; Loose, M	FRONTIERS IN GENETICS	English	Article	bioinformactics; software; pipeline; viral sequence analysis; genomics; nanopore sequencing; oxford nanopore minION; oxford nanopore technologies (ONT)	/	The ongoing SARS-CoV-2 pandemic demonstrates the utility of real-time sequence analysis in monitoring and surveillance of pathogens. However, cost-effective sequencing requires that samples be PCR amplified and multiplexed via barcoding onto a single flow cell, resulting in challenges with maximising and balancing coverage for each sample. To address this, we developed a real-time analysis pipeli…	University of Nottingham; University of Nottingham; Guy's & St Thomas' NHS Foundation Trust	20	FRONTIERS MEDIA SA	LAUSANNE	FRONT GENET	2023	8	2.8	10.3389/fgene.2023.1138582	11	Genetics & Heredity	37051600	WOS:000967374600001
Long-Read RNA Sequencing Identifies Polyadenylation Elongation and Differential Transcript Usage of Host Transcripts During SARS-CoV-2 In Vitro Infection	Chang, JJY; Gleeson, J; Rawlinson, D; De Paoli-Iseppi, R; Zhou, CX; Mordant, FL; Londrigan, SL; Clark, MB; Subbarao, K; Stinear, TP; Coin, LJM; Pitt, ME	FRONTIERS IN IMMUNOLOGY	English	Article	Nanopore RNA sequencing; SARS-CoV-2 infection; host response; COVID-19; polyadenylation	GENE SIGNATURES; MESSENGER-RNA; POLY(A) TAIL; HUMAN LUNG; INTERFERON; REVEALS; CELLS	Better methods to interrogate host-pathogen interactions during Severe Acute Respiratory Syndrome Coronavirus 2 (SARS-CoV-2) infections are imperative to help understand and prevent this disease. Here we implemented RNA-sequencing (RNA-seq) using Oxford Nanopore Technologies (ONT) long-reads to measure differential host gene expression, transcript polyadenylation and isoform usage within various …	University of Melbourne; Peter Doherty Institute; University of Melbourne; University of Melbourne; World Health Organization; World Health Organization (WHO) Australia; University of Melbourne; Peter Doherty Institute; Imperial College London; University of Queensland	66	FRONTIERS MEDIA SA	LAUSANNE	FRONT IMMUNOL	2022	8	5.7	10.3389/fimmu.2022.832223	17	Immunology	35464437	WOS:000792028500001
The application of targeted nanopore sequencing for the identification of pathogens and resistance genes in lower respiratory tract infections	Zhang, HY; Wang, M; Han, XM; Wang, T; Lei, YJ; Rao, Y; Xu, PS; Wang, YF; Gu, HC	FRONTIERS IN MICROBIOLOGY	English	Article	pathogen detection; nanopore sequencing; respiratory system; species; resistance genes	BACTERIAL-MENINGITIS	ObjectivesLower respiratory tract infections (LRTIs) are one of the causes of mortality among infectious diseases. Microbial cultures commonly used in clinical practice are time-consuming, have poor sensitivity to unculturable and polymicrobial patterns, and are inadequate to guide timely and accurate antibiotic therapy. We investigated the feasibility of targeted nanopore sequencing (TNPseq) for…	Chinese Academy of Sciences; Hefei Institutes of Physical Science, CAS; Chinese Academy of Sciences; University of Science & Technology of China, CAS	45	FRONTIERS MEDIA SA	LAUSANNE	FRONT MICROBIOL	2022	8	4	10.3389/fmicb.2022.1065159	10	Microbiology	36620015	WOS:000908070200001
On-Site Genomic Epidemiological Analysis of Antimicrobial-Resistant Bacteria in Cambodia With Portable Laboratory Equipment	Hirabayashi, A; Yanagisawa, H; Takahashi, H; Yahara, K; Boeing, P; Wolfenden, B; Nov, V; Lorn, V; Veng, M; Ann, V; Darapheak, C; Shibayama, K; Suzuki, M	FRONTIERS IN MICROBIOLOGY	English	Article	AMR; carbapenemase; CPE; Acinetobacter; Cambodia	ENTEROBACTER-CLOACAE; MULTIPLEX PCR; CARBAPENEMASE; EXPRESSION; PLASMID; GENES	The rapid emergence of carbapenemase-producing gram-negative bacteria (CPGNB) is a global threat due to the high mortality of infection and limited treatment options. Although there have been many reports of CPGNB isolated from Southeast Asian countries, to date there has been no genetic analysis of CPGNB isolated from Cambodia. Sequence-based molecular epidemiological analysis enables a better u…	Japan Institute for Health Security (JIHS); National Institute of Infectious Diseases (NIID); Juntendo University; Japan Institute for Health Security (JIHS); National Institute of Infectious Diseases (NIID)	36	FRONTIERS MEDIA SA	LAUSANNE	FRONT MICROBIOL	2021	8	4	10.3389/fmicb.2021.675463	11	Microbiology	34054783	WOS:000654992300001
Microbial Characteristics and Genomic Analysis of an ST11 Carbapenem-Resistant Klebsiella pneumoniae Strain Carrying blaKPC-2 Conjugative Drug-Resistant Plasmid	Zeng, LY; Zhang, JS; Hu, KW; Li, J; Wang, JM; Yang, CR; Huang, W; Yin, LN; Zhang, XL	FRONTIERS IN PUBLIC HEALTH	English	Article	carbapenem-resistant Klebsiella pneumoniae; ST11; whole-genome sequencing; nanopore; KPC-2	DNA STRANDS	BackgroundThe sequence type 11 (ST11) carbapenem-resistant Klebsiella pneumoniae (CRKP) carrying bla(KPC-2) has been widespread all over the world, and it has been reported frequently in China. The bla(KPC-2) located on the mobile genetic element brings tremendous pressure to control the spread and outbreak of resistant bacteria. Whole-genome sequencing (WGS) technology can comprehensively and in…	Chongqing Medical University; Zhejiang University; Jiamusi University	44	FRONTIERS MEDIA SA	LAUSANNE	FRONT PUBLIC HEALTH	2022	8	3	10.3389/fpubh.2021.809753	9	Public, Environmental & Occupational Health	35155355	WOS:000753627100001
A multicenter study on accuracy and reproducibility of nanopore sequencing-based genotyping of bacterial pathogens	Dabernig-Heinz, J; Lohde, M; Hölzer, M; Cabal, A; Conzemius, R; Brandt, C; Kohl, M; Halbedel, S; Hyden, P; Fischer, MA; Pietzka, A; Daza, B; Idelevich, EA; Stöger, A; Becker, K; Fuchs, S; Ruppitsch, W; Steinmetz, I; Kohler, C; Wagner, GE	JOURNAL OF CLINICAL MICROBIOLOGY	English	Article	nanopore sequencing; multicenter performance study; bacterial typing; genomic surveillance; cgMLST; molecular surveillance	TYPING SCHEME; GENOMICS	Nanopore sequencing has shown the potential to democratize genomic pathogen surveillance due to its ease of use and low entry cost. However, recent genotyping studies showed discrepant results compared to gold-standard short-read sequencing. Furthermore, although essential for widespread application, the reproducibility of nanopore-only genotyping remains largely unresolved. In our multicenter pe…	Medical University of Graz; Friedrich Schiller University of Jena; Robert Koch Institute; Robert Koch Institute; Otto von Guericke University; Robert Koch Institute; Friedrich Loeffler Institute	45	AMER SOC MICROBIOLOGY	WASHINGTON	J CLIN MICROBIOL	2024	8	6.1	10.1128/jcm.00628-24	17	Microbiology	39158309	WOS:001293667200002
Nanopore sequencing from extraction-free direct PCR of dried serum spots for portable hepatitis B virus drug-resistance typing	Astbury, S; Soares, MMCN; Peprah, E; King, B; Jardim, ACG; Shimizu, JF; Jalal, P; Saeed, CH; Sabeer, FT; Irving, WL; Tarr, AW; McClure, CP	JOURNAL OF CLINICAL VIROLOGY	English	Article	Dried blood spot; Nanopore sequencing; Portable diagnostic test; Hepatitis B virus; Resistance-associated substitutions; Genotyping	PERINATAL TRANSMISSION; MUTATIONS; AFRICA; LAMIVUDINE; HBV; INFECTION; PREGNANCY; DATABASE; HIV	Background: Effective drug regimens for the treatment of hepatitis B virus (HBV) infections are essential to achieve the World Health Organisation commitment to eliminate viral hepatitis by 2030. Lamivudine (3TC) is widely used in countries with high levels of chronic HBV, however resistance has been shown to occur in up to 50 % of individuals receiving continuous monotherapy for 4 years. Telbivu…	University of Nottingham; Nottingham University Hospital NHS Trust; University of Nottingham; UK Research & Innovation (UKRI); Engineering & Physical Sciences Research Council (EPSRC); University of Nottingham; Instituto Adolfo Lutz; University of Nottingham; Universidade Federal de Uberlandia; University of Sulimanyah; Hawler Medical University; Universidade Estadual Paulista	33	ELSEVIER	AMSTERDAM	J CLIN VIROL	2020	8	4	10.1016/j.jcv.2020.104483	7	Virology	32544862	WOS:000552972500012
Repeated transmission of SARS-CoV-2 in an overcrowded Irish emergency department elucidated by whole-genome sequencing	Hare, D; Meaney, C; Powell, J; Slevin, B; O' Brien, B; Power, L; O' Connell, NH; De Gascun, CF; Dunne, CP; Stapleton, PJ	JOURNAL OF HOSPITAL INFECTION	English	Article	SARS-CoV-2; Whole-genome sequencing; COVID-19; Outbreak investigation; Genomic epidemiology; Hospital overcrowding	NOSOCOMIAL OUTBREAK	Aim: To provide a detailed genomic-epidemiological description of a complex multi-ward SARS-CoV-2 outbreak, which originated in the crowded emergency department (ED) in our hospital during the third wave of the COVID-19 pandemic, and was elucidated promptly by local whole-genome sequencing (WGS). Methods: SARS-CoV-2 was detected by reverse transcriptase real-time polymerase chain reaction on vira…	University of Limerick; University of Limerick; University College Dublin; University of Limerick; University of Limerick	45	W B SAUNDERS CO LTD	LONDON	J HOSP INFECT	2022	8	3.9	10.1016/j.jhin.2022.04.015	9	Public, Environmental & Occupational Health; Infectious Diseases	35562074	WOS:000821412300001
Rapid and sensitive single-sample viral metagenomics using Nanopore Flongle sequencing	Pichler, I; Schmutz, S; Ziltener, G; Zaheri, M; Kufner, V; Trkola, A; Huber, M	JOURNAL OF VIROLOGICAL METHODS	English	Article	Viral metagenomics; Nanopore sequencing; Flongle flow cells; Clinical diagnostics	VIRUS-INFECTION; DIAGNOSIS; ENCEPHALITIS; MENINGITIS	The ability of viral metagenomic Next-Generation Sequencing (mNGS) to unbiasedly detect nucleic acids in a clinical sample is a powerful tool for advanced diagnosis of viral infections. When clinical symptoms do not provide a clear differential diagnosis, extensive laboratory testing with virus-specific PCR and serology can be replaced by a single viral mNGS analysis. However, widespread diagnost…	University of Zurich	48	ELSEVIER	AMSTERDAM	J VIROL METHODS	2023	8	2.2	10.1016/j.jviromet.2023.114784	9	Biochemistry & Molecular Biology; Biotechnology & Applied Microbiology; Virology	37516367	WOS:001088212200001
MinION nanopore sequencing and assembly of a complete human papillomavirus genome	Brancaccio, RN; Robitaille, A; Dutta, S; Rollison, DE; Tommasino, M; Gheit, T	JOURNAL OF VIROLOGICAL METHODS	English	Article	MinION sequencer; Oxford Nanopore Technologies; Whole-genome sequencing; Papillomavirus	VIRUS GENOMES; GENERATION; CLASSIFICATION; IDENTIFICATION; DIVERSITY	Background: The MinION sequencer belongs to the third generation of sequencing technology that allows for the generation of ultra-long reads, representing a potentially more effective approach to characterize entire viral genome sequences than other time-consuming and low-throughput methodologies. Methods: We report the use of the MinION nanopore sequencer to sequence the full-length genome of hu…	World Health Organization; International Agency for Research on Cancer (IARC); H Lee Moffitt Cancer Center & Research Institute	64	ELSEVIER	AMSTERDAM	J VIROL METHODS	2021	8	2.2	10.1016/j.jviromet.2021.114180	11	Biochemistry & Molecular Biology; Biotechnology & Applied Microbiology; Virology	33965458	WOS:000661415300002
Hybrid De Novo Genome Assembly for the Generation of Complete Genomes of Urinary Bacteria using Short- and Long-read Sequencing Technologies	Sharon, BM; Hulyalkar, NV; Nguyen, VH; Zimmern, PE; Palmer, KL; De Nisco, NJ	JOVE-JOURNAL OF VISUALIZED EXPERIMENTS	English	Article	/	IDENTIFICATION; PLASMIDFINDER; PCR	Complete genome sequences provide valuable data for the understanding of genetic diversity and unique colonization factors of urinary microbes. These data may include mobile genetic elements, such as plasmids and extrachromosomal phage, that contribute to the dissemination of antimicrobial resistance and further complicate treatment of urinary tract infection (UTI). In addition to providing fine …	University of Texas System; University of Texas Dallas; University of Texas System; University of Texas Southwestern Medical Center Dallas	47	JOURNAL OF VISUALIZED EXPERIMENTS	CAMBRIDGE	JOVE-J VIS EXP	2021	8	1.2	10.3791/62872	24	Science & Technology - Other Topics	34487123	WOS:000705022900029
[truncated: 375 more rows]
